# Supplementary material for: The p38/HOG stress-activated protein kinase network couples growth to division in Candida albicans
Source: PLoS Genet. 2019 Mar 28;15(3):e1008052. doi: 10.1371/journal.pgen.1008052 (PMC6456229; doi:10.1371/journal.pgen.1008052)
Supplement: S1 Table — Mean, median and mode size of each strain are indicated. (XLSX) [file pgen.1008052.s007.xlsx]

## Sheet: Description
Table S1
Description
Excel spreadsheet containing experimental size data of individual mutant from different C. albicans genetic resources. Mean, median and mode size of each strain are shown.

## Sheet: Kinase collection
Strain.ID	orf19 ID	Name	S.cerevisiae homolog	Mean	Median	Mode
jjh103	orf19.896	CHK1		76.2	69	56.7
jmr114	orf19.895	HOG1	YLR113W	52	50.2	40.3
SF045A	orf19.846		YKL171W	83.6	76.5	60.8
SF041	orf19.844	STE11	YLR362W	75.2	66.2	44.4
jjh130	orf19.835		YFL013C	84.9	78.5	54.6
vic109 (K.O.)	orf19.7652	CKA1	YIL035C	80.5	73.1	46.4
vic1176	orf19.7523	MKC1	YHR030C	83.3	76.5	68.3
SF014A	orf19.7510	KIN2	YLR096W	73.2	63.5	45.7
SF028	orf19.7451	FUN31	YAL017W	79.7	71	51.9
jjh31	orf19.7388	PBS2	YJL128C	59.5	49.2	34.1
SF046	orf19.7355	SSN8	YNL025C	82.9	76.5	18.4
jjh176	orf19.7281	PDK2	YIL042C	82.6	75.1	59.4
jrb86-2	orf19.7164		YPL236C	78.8	70.3	49.2
SF024A	orf19.7044	RIM15	YFL033C	83.4	75.1	53.3
jjh34	orf19.7001	YCK2	YNL154C	81.2	74.4	60.1
SF006	orf19.6913	GCN2	YDR283C	72.8	64.2	50.5
vic1157	orf19.6889	MKK2	YOR231W	82.3	75.1	58
jjh87	orf19.663	GIN4	YDR507C	82.8	75.8	58
jjh243	orf19.6369	RIO2	YNL207W	88.7	82.6	69
jrb103	orf19.5911	CMK1	YMR291W	74.1	66.2	46.4
jjh71	orf19.5408	HRK1	YOR267C	80.8	73.7	51.9
SF011	orf19.5357	AKL1	YBR059C	88.8	82.6	63.5
jjh47	orf19.5350	ScCtk3	YML112W	41.5	31.4	18.4
jrb100	orf19.5325	KIN3	YAR018C	91.5	87.4	77.8
SF025	orf19.5253			81.2	73.1	49.2
jjh128	orf19.5224	PKH2	YOL100W	72.8	64.9	38.9
jjh37	orf19.5181	NIK1		74.1	66.9	18.4
SF004A	orf19.5162	BCK1	YJL095W	79.8	72.4	53.3
SF008	orf19.5068	IRE1	YHR079C	81.3	75.8	66.2
jjh113	orf19.4909	CBK1	YNL161W	62.1	53.9	18.4
jjh67	orf19.4892	TPK1		76.7	71.7	68.3
jjh116	orf19.4890	CLA4	YNL298W	86.4	79.9	60.1
jjh96	orf19.4867	SWE1	YJL187C	49.5	44	28.1
jjh120	orf19.4866	CPP1	YNL053W	81.4	73.1	67.6
jjh44	orf19.469	HST7	YDL159W	72.2	62.8	46.4
SA0148 (KO)	orf19.460	CEK2		74.4	65.6	47.8
SF035A	orf19.4518		YPL150W	90.1	83.3	58.7
jjh54	orf19.451	SOK1	YDR006C	67.2	57.3	49.8
SF001A	orf19.4432	KSP1	YHR082C	75.6	66.9	44.4
SF013A	orf19.4347		YKL116C	92.4	87.4	59.4
jjh119	orf19.4308	HSL1	YKL101W	61.1	30	18.4
SF030	orf19.4297	CKB2	YOR039W	48.7	34.8	18.4
SF054A	orf19.428		YJL057C	84.2	77.2	55.3
jjh245	orf19.4269			83.8	76.5	64.9
jjh39	orf19.4252		YGR262C	80.8	73.1	62.8
jjh59	orf19.4242	CST20	YHL007C	75.3	66.9	53.9
jjh244	orf19.4144		YLR253W	89.1	84.7	66.2
jjh85	orf19.4084	KIS1	YER027C	80.9	74.4	53.3
SF051	orf19.4002	DUN1	YDL101C	89.4	84.7	66.9
jjh94	orf19.4001		YDL107W	69.9	62.8	50.5
SF009	orf19.3854	SAT4	YCR008W	27.6	19.8	19.1
SF042	orf19.3841		YGL180W	78.1	70.3	53.9
SF021	orf19.3751		YPL141C	84.6	79.2	67.6
jjh179	orf19.3744		YOR112W	85	78.5	56.7
SF049A	orf19.3720			86	79.2	68.3
SF002	orf19.3545	CDC15	YAR019C	76.5	69	44.4
SF029A	orf19.3530	CKA2	YOR061W	81	73.7	56
jjh92	orf19.35			61.2	54.6	18.4
NJ77-4	orf19.3415	PTK2	YJR059W	74.8	68.3	18.4
jjh111	orf19.3256	SLN1	YIL147C	90	88	40
SF043	orf19.3049		YDR523C	80.5	73.1	53.3
jjh108	orf19.3047		YNL257C	78.8	71.7	69
SF050	orf19.2910	PGA43		86.2	79.9	66.2
SF005	orf19.2678	BUB1	YGR188C	81.5	76.5	56.7
jjh48	orf19.2605	PRK1	YNL020C	83.2	75.1	64.2
SF044	orf19.2436		YMR216C	86.8	81.3	60.8
jjh61	orf19.2395	IME2	YJL106W	84.4	78.5	60.8
jjh90	orf19.2341	HNT1	YDL125C	79.6	71.7	59.4
SF026	orf19.2277	TPK2	YPL203W	85	78.5	64.2
SF037	orf19.2268	RCK2	YLR248W	84.1	77.2	64.9
jjh74	orf19.223		YNR047W	90.2	86.7	86
H957-8	orf19.2222		YER123W	84.6	77.8	60.8
jjh55	orf19.1874		YOR351C	80.1	73.1	51.2
OA02-7	orf19.1341	PRR2		82.3	75.8	63.5
BM39-3	orf19.130	VPS15	YBR097W	79.7	71.7	53.9
BG44-1	orf19.1283	MEC1	YBR136W	91.6	89.4	82.6
jjh79	orf19.1196	PKH3	YDR466W	84	77.2	62.8

## Sheet: Homann collection
Strain.ID	orf19 ID	Name	S.cerevisiae homolog	Mean	Median	Mode
153	orf19.3012	ARO81		34	28	15
156	orf19.610	EFG1		34	28	15
132	orf19.7381	AHR1		34	34	28
138	orf19.1187	CPH2	YOR032C	48.3	34.1	18.4
80	orf19.681	HAP43	YHL009C	40	38	19
87	orf19.1228	HAP2	YGL237C	42	38	28
152	orf19.2054	FGR15		48	42	15
125	orf19.7150	NRG1	YBR066C	47	42	39
144	orf19.3182	GIS2	YNL255C	51	45	28
121	orf19.6798	SSN6	YBR112C	53	46	30
85	orf19.1035	WAR1	YML076C	53	47	28
86	orf19.1168	ZCF3		54	47	30
89	orf19.1496			53	47	32
74	orf19.166	ASG1	YIL130W	53	47	28
44	orf19.5326	MIG2		53	47	30
56	orf19.5992	WOR2		54	47	30
81	orf19.837.1	INO4	YOL108C	54	47	29
83	orf19.971	SKN7	YHR206W	55	48	28
148	orf19.1227	ZCF4		55	50	32
151	orf19.1577		YMR136W	55	50	34
97	orf19.2476		YMR176W	55	50	33
141	orf19.1718	ZCF8		57	51	44
75	orf19.217			58	51	29
99	orf19.2753	ZCF15		54	51	33
22	orf19.4056	BRG1		57	51	32
24	orf19.4166	ZCF21		57	51	28
111	orf19.5249			55	51	35
47	orf19.5498	EFH1		56	51	31
114	orf19.5729	FGR17		55	51	33
124	orf19.6985	TEA1	YOR337W	57	51	34
67	orf19.7319	SUC1	YGR288W	57	51	30
70	orf19.7374	CTA4	YAL051W	57	51	30
71	orf19.7518	ZCF38		57	51	29
58	orf19.6102	RCA1	YIL036W	66.5	51.9	18.4
160	orf19.2743	RPH1	YER169W	57	52	30
129	orf19.3193	FCR3	YHL009C	58	52	33
106	orf19.3794	CSR1	YJL056C	57	52	35
147	orf19.4869	SFU1	YER040W	58	52	15
38	orf19.4972			58	52	32
53	orf19.5924	ZCF31		58	52	30
60	orf19.6182	MRR2		57	52	30
62	orf19.6824	TRY6		58	52	31
126	orf19.7247	RIM101	YHL027W	58	52	33
73	orf19.7583	ZCF39		59	52	30
4	orf19.1253	PHO4	YFR034C	59	53	32
15	orf19.3753	SEF1	YBL066C	59	53	31
77	orf19.391	UPC2	YDR213W	60	53	31
20	orf19.3969	SFL2		59	53	34
49	orf19.5651	JHD2	YJR119C	58	53	33
51	orf19.5855	MBP1	YDL056W	58	53	30
63	orf19.6874			60	53	33
65	orf19.7068	MAC1	YMR021C	60	53	33
69	orf19.7372	MRR1		60	53	33
3	orf19.1069	RPN4	YDL020C	62	54	40
145	orf19.3736	KAR4	YCL055W	58	54	15
26	orf19.4251	ZCF22		61	54	30
32	orf19.4662	RLM1	YPL089C	61	54	31
11	orf19.3190	HAL9		61	55	32
128	orf19.7436	AAF1		60	55	36
79	orf19.517	HAP31	YBL021C	62	56	30
102	orf19.2961			60	57	40
104	orf19.3127	CZF1		62	57	36
61	orf19.6514	CUP9	YGL096W	65	58	31
162	orf19.4961	STP2	YHR006W	64	59	45
90	orf19.1543	OPI1	YHL020C	66	59	40
140	orf19.1623	CAP1	YML007W	64	59	47
91	orf19.1685	ZCF7		65	59	41
142	orf19.2315	RTG3	YBL103C	66	59	47
107	orf19.4318	MIG1	YGL035C	65	59	25
113	orf19.5558	RBF1		64	59	43
116	orf19.5910			63	59	31
117	orf19.6109	TUP1	YCR084C	64	59	44
123	orf19.6888	NTO1		64	59	43
68	orf19.7359	CRZ1	YNL027W	65	59	43
157	orf19.1150	GLN3		66	60	42
143	orf19.2612			67	60	41
100	orf19.2808	ZCF16		64	60	42
133	orf19.3187	ZNC1		65	60	42
163	orf19.3865	RFX1		65	60	26
27	orf19.4288	CTA7	YMR019W	67	60	37
29	orf19.4450	ZCF23		67	60	41
118	orf19.6121	MNL1	YER130C	64	60	46
119	orf19.6680	FGR27		65	60	43
120	orf19.6781	ZFU2		65	60	44
122	orf19.6817	FCR1		65	60	44
1	orf19.454	SFL1	YOR140W	68	61	33
164	orf19.2747	RGT1	YKL038W	66	61	45
105	orf19.3625			66	61	43
28	orf19.4438	RME1	YGR044C	67	61	41
30	orf19.4524	ZCF24		68	61	43
34	orf19.4722	RTG1	YOL067C	67	61	41
39	orf19.5001	CUP2	YPR008W	67	61	40
40	orf19.5026			67	61	40
43	orf19.5251	ZCF30		67	61	39
54	orf19.5940	ZCF32		66	61	41
55	orf19.5975			66	61	40
33	orf19.4670	CAS5		73	62	32
37	orf19.4941	TYE7	YOR344C	72.8	62.8	46.4
19	orf19.3928			75.2	66.9	53.9
41	orf19.5097	CAT8	YMR280C	75.2	66.9	51.2
48	orf19.5548	LYS14		74.9	66.9	56.7
6	orf19.2646	ZCF13		75.7	66.9	49.8
93	orf19.1973	HAP5	YOR358W	73.2	66.9	18.4
10	orf19.3188	TAC1	YOL089C	76.1	67.6	55.3
18	orf19.3912	GLN3	YER040W	75.3	67.6	49.8
42	orf19.5133	ZCF29		76.1	67.6	47.8
45	orf19.5338	GAL4	YPL248C	75.1	67.6	55.3
46	orf19.5380	LYS144		76.3	67.6	47.1
7	orf19.2647	ZCF14		76.5	67.6	49.8
17	orf19.3876	ZCF19		76.6	68.3	51.2
21	orf19.4000	GRF10	YDL106C	76.4	68.3	56.7
23	orf19.4145	ZCF20	YLR256W	75.3	68.3	58
31	orf19.4568	ZCF25		76.9	68.3	49.8
8	orf19.2730			76.6	68.3	51.2
12	orf19.3305	ZCF17		76.3	69	60.8
36	orf19.4853	HCM1	YCR065W	78.7	70.3	49.2
35	orf19.4778	LYS142		80.1	71.7	47.1
9	orf19.2748	ARG83		78.7	71.7	49.8
50	orf19.5849	CWT1	YPL133C	80.8	71.7	51.2
2	orf19.921	HMS1		82.5	74.4	53.9
13	orf19.3308	STB5	YHR178W	82.9	75.1	55.3
78	orf19.431	ZCF2		82.5	75.1	59.4
150	orf19.1497	ZCF6		82.3	75.1	41.7
146	orf19.4767	ZCF28		82.8	75.8	43
153	orf19.3012	ARO80	YDR421W	83.5	75.8	47.8
115	orf19.5908	TEC1	YBR083W	83.2	76.5	52.6
135	orf19.4573	ZCF26		82.8	76.5	53.9
14	orf19.3434	TRY5	YGR067C	85.3	78.5	51.9
84	orf19.1032	SKO1	YNL167C	85.2	78.5	60.8
130	orf19.4766	ARG81	YML099C	75.5	68.5	59
159	orf19.1757		YDR253C	76.1	69.2	59.6
165	orf19.3986	PPR1	YLR014C	75.9	69.2	52.8
103	orf19.3063	HFL1	YBR278W	77.4	70.6	63.1
109	orf19.4752	MSN4	YMR037C	77	70.6	60.3
127	orf19.7401	ISW2	YOR304W	76.5	70.6	54.9
131	orf19.7371	ZCF35		77	70.6	60.3
136	orf19.173		YOR113W	77.4	70.6	59
149	orf19.1255	ZCF5		77.7	70.6	58.3
64	orf19.7017	YOX1	YML027W	78.8	72.6	64.4
72	orf19.7570	UGA3	YDL170W	78.7	72.6	60.3
98	orf19.2745	UME7	YDR207C	79	72.6	61.7
108	orf19.4647	HAP3		79.6	73.3	54.2
57	orf19.6038	UGA32		79.7	73.3	54.9
66	orf19.7317	UGA33		79.9	73.3	61.7
92	orf19.1926	SEF2		79.6	73.3	57.6
101	orf19.2842	GZF3	YJL110C	79.8	74	69.9
112	orf19.5343	ASH1	YKL185W	79.4	74	60.3
52	orf19.5917	STP1		79.7	74	64.4
76	orf19.255	ZCF1		79.7	74	59
88	orf19.1274			79.8	74	64.4
155	orf19.3252	DAL81	YIR023W	90	84	75.1
63	orf19.6874			91.1	84.7	67.6
82	orf19.909	STP4	YLR375W	89.2	84.7	78.5
139	orf19.1275	GAT1	YFL021W	91.7	85.4	65.6
5	orf19.1499	CTF1		90.5	86.7	69
110	orf19.4998	ROB1		91.3	86.7	70.3
16	orf19.3809	BAS1	YKR099W	89	88	50
25	orf19.4225	LEU3	YLR451W	89	88	40
59	orf19.6124	ACE2		90	88	29
154	orf19.4649	ZCF27		92.1	88.8	97.6
137	orf19.723	BCR1	YPL230W	93.4	90.1	62.1
158	orf19.1773	RAP1	YNL216W	93.7	90.1	73.1
134	orf19.4545	SWI4	YER111C	92	91	15
161	orf19.4776	LYS143	YDR034C	93.9	92.9	69.6
95	orf19.2119	NDT80	YHR124W	94.1	94.9	18.4

## Sheet: Sanglard
Strain.ID	orf19 ID	Name	S.cerevisiae homolog	Mean	Median	Mode
HZY2-2	orf19.1032	SKO1	YNL167C	71.6	68.6	47.8
DSY4165-B	orf19.1150			81.4	76.3	59.9
DSY4165-A	orf19.1150			79.9	73.9	48.4
DSY4181	orf19.1168	ZCF3		85.9	82.3	70.2
SFY45	orf19.1187	CPH2	YOR032C	77.9	70.9	57.5
SFY5	orf19.1253	PHO4	YFR034C	74.5	66.6	38.2
SFY11	orf19.1275	GAT1	YFL021W	76.1	69.6	56.3
SFY19	orf19.1314			76	70.2	44.8
SFY19-2	orf19.1314			75	67.8	50.9
DSY3297	orf19.1499	CTF1		78.5	73.3	52.7
SFY4-2	orf19.1577		YMR136W	78.6	73.3	58.1
SFY4	orf19.1577		YMR136W	78.7	72.7	58.1
CMY8-1	orf19.1697		YOR091W	81.2	74.5	60.6
CMY8-2	orf19.1698		YNL094W	80.8	75.7	59.3
SFY46-2	orf19.1759	PHO23	YNL097C	88.2	85.4	61.8
SFY42	orf19.1971	TRY3		79.3	73.3	54.5
HL11-1	orf19.2012	NOT3	YIL038C	79.5	74.5	58.1
HL11-3	orf19.2012	NOT3	YIL038C	79.6	74.5	62.4
SFY44	orf19.2097		YLR032W	77.1	70.2	54.5
SFY44-2	orf19.2097		YLR032W	77.1	69.6	50.3
CJN863	orf19.2331	ADA2	YDR448W	72.9	66.6	56.9
DSY4169-B	orf19.2545	DOT6	YER088C	67.3	56.9	31.5
DSY4169-A	orf19.2545	DOT6	YER088C	54	49	35
GKO341	orf19.2646	ZCF13		79.5	73.9	59.3
GKO342	orf19.2646	ZCF13		79.6	73.9	59.9
CJN911	orf19.2674			79.3	73.3	53.3
SFY47	orf19.2695	UBR1	YGR184C	80.9	75.7	58.7
SFY47-2	orf19.2695	UBR1	YGR184C	80.2	75.1	60.6
DSY4180	orf19.2747	RGT1	YKL038W	79.3	73.3	66.6
GKO613	orf19.2808	ZCF16	YJL089W	81.5	76.9	52.1
GKO612	orf19.2808	ZCF16	YJL089W	79.9	74.5	56.9
SFY43	orf19.2842	GZF3	YJL110C	80	74.5	52.7
SFY43-2	orf19.2842	GZF3	YJL110C	79.4	73.9	51.5
JA54-3	orf19.3012	ARO80	YDR421W	81.3	76.9	54.5
GKO843	orf19.3012	ARO80	YDR421W	81.8	76.3	60.6
GKO317	orf19.3012	ARO80	YDR421W	80.5	75.7	62.4
JA54-5	orf19.3012	ARO80	YDR421W	80.1	75.7	59.3
GKO316	orf19.3012	ARO80	YDR421W	80	74.5	54.5
GKO844	orf19.3012	ARO80	YDR421W	79.9	74.5	66
GKO663	orf19.3190	HAL9		83	78.7	42.4
GKO664	orf19.3190	HAL9		78.6	72.7	50.9
DSY4175-A	orf19.3201	MTLA1	YCR097W	96.6	101.7	116.3
SFY33	orf19.3281		YER051W	77.5	70.9	52.1
SFY33-2	orf19.3281		YER051W	76.3	69	53.3
SFY36	orf19.3407	RAD18	YCR066W	76.5	69	52.1
SFY36-2	orf19.3407	RAD18	YCR066W	75.2	67.2	56.9
SFY9	orf19.3969	SFL2	YGR249W	92.5	95.7	96.9
CMY12-1	orf19.4000	GRF10	YDL106C	74.9	67.8	49.1
CMY12-2	orf19.4000	GRF10	YDL106C	74.9	67.8	54.5
SFY7-2	orf19.4062	TRY2		80.1	74.5	58.1
SFY7	orf19.4062	TRY2		75.5	67.8	49.6
RLS18	orf19.4225	LEU3	YLR451W	81.9	77.5	59.3
RLS19	orf19.4225	LEU3	YLR451W	80.8	75.7	49.1
CJN805	orf19.4776	LYS143	YDR034C	78.8	72.7	59.9
CJN807	orf19.4778	LYS142		79.8	74.5	55.1
DSY4203-c	orf19.4869	SFU1		77.2	70.2	59.3
DSY4203-e	orf19.4869	SFU1		75.8	68.4	53.3
DSY3422-8	orf19.4961	STP2	YHR006W	73.9	66.6	55.1
DSY4179-A	orf19.5097	CAT8	YMR280C	80.3	74.5	49.6
DSY4179-B	orf19.5097	CAT8	YMR280C	69	61.8	44.8
SFY3	orf19.5175		YIL030C	76.1	69.6	55.1
SFY3-2	orf19.5175		YIL030C	75.8	69.6	51.5
DSY4178-B	orf19.5251	ZCF30		84	80.5	53.3
DSY4178-A	orf19.5251	ZCF30		83.4	78.7	63
GKO278	orf19.5251	ZCF30		81	76.3	58.7
GKO279	orf19.5251	ZCF30		81.5	76.3	58.7
SFY39	orf19.5312	MET4	YNL103W	77.6	70.2	51.5
SFY39-2	orf19.5312	MET4	YNL103W	76.8	69	55.1
SFY14-2	orf19.5389	FKH2	YIL131C	79.2	74.5	50.3
SFY18-2	orf19.5498	EFH1		79.1	74.5	60.6
SFY18	orf19.5498	EFH1		74.1	67.2	52.7
CJN528	orf19.5548	LYS14		79.1	73.3	56.3
DSY4171	orf19.5617		YPL181W	86.3	85.4	55.7
SFY6	orf19.5651		YJR119C	76.5	70.2	54.5
SFY6-2	orf19.5651		YJR119C	74.8	66.6	54.5
SFY2	orf19.5660		YDR265W	78	71.5	53.3
SFY2-2	orf19.5660		YDR265W	77.9	71.5	52.7
CMY10-1	orf19.5676		YLR427W	79.4	72.7	56.3
CMY10-2	orf19.5676		YLR427W	78.8	72.7	63.6
SFY37	orf19.5722		YDR026C	79.6	74.5	56.9
SFY37-2	orf19.5722		YDR026C	72.7	64.8	52.1
SFY16	orf19.59	REI1	YBR267W	79	73.3	60.6
DSY3452-17	orf19.5953	SFP1	YLR403W	66	49	30
CMY6-1	orf19.5992	WOR2		80.3	74.5	53.3
CMY6-2	orf19.5992	WOR2		80.5	74.5	52.1
RLS49	orf19.6203	PUT3	YKL015W	82.1	77.5	53.9
RLS48	orf19.6203	PUT3	YKL015W	78.9	73.3	54.5
DSY4176-A	orf19.6514	CUP9	YGL096W	76.5	70.2	52.7
DSY4176-B	orf19.6514	CUP9	YGL096W	75	67.8	53.9
DSY4173-B	orf19.6645	HMO1	YDR174W	61	53	38
DSY4173-A	orf19.6645	HMO1	YDR174W	59	51	30
DSY4163-B	orf19.6753		YBR062C	84.2	81.1	57.5
DSY4163-A	orf19.6753		YBR062C	80.1	74.5	54.5
DSY4163-C	orf19.6753		YBR062C	79.3	73.9	56.9
RLS105	orf19.6801	RPD31	YNL330C	81.7	76.9	57.5
RLS106	orf19.6801	RPD31	YNL330C	81.8	76.9	61.2
SFY10	orf19.6824	TRY6		79	72.1	55.1
SFY10-2	orf19.6824	TRY6		77	70.2	48.4
GKO570	orf19.6850		YDR255C	80.5	75.1	57.5
CMY2	orf19.6874			79.7	73.9	55.1
GR08-2	orf19.6904	GCN3	YKR026C	81	75.7	55.1
CJN1007	orf19.7025	MCM1	YMR043W	78.8	73.3	56.9
GKO631	orf19.7381	AHR1		60.1	57.1	30.6
GKO282	orf19.7381	AHR1		61.2	55	37.1
GKO630	orf19.7381	AHR1		59	54	34
DSY4160	orf19.7381	AHR1		60	52.3	40.1
GKO691	orf19.7381	AHR1		53	49	36
SFY15	orf19.7385		YPL054W	77	70.9	57.5
SFY15-2	orf19.7385		YPL054W	76.5	70.2	54.5
DSY4183-A	orf19.7397		YPR022C	82.5	76.9	56.9
DSY4183-B	orf19.7397		YPR022C	79.9	73.9	51.5
DSY3332	orf19.7523	MKC1	YHR030C	74.1	66.6	54.5
SFY1-2	orf19.7547		YDR313C	79	73.9	53.3
SFY1	orf19.7547		YDR313C	78.8	73.3	57.5
GKO832	orf19.7583	ZCF39		81.5	75.7	58.1
GKO830	orf19.7583	ZCF39		79	73.3	54.5
GG91-1	orf19.7612	CTM1	YHR109W	87	84.2	70.2
DSY4182	orf19.7849			77.1	70.9	48.4
SFY8	orf19.8085			75	68.4	44.8
SFY8-2	orf19.8085			74.1	67.8	53.3
CJN817	orf19.909	STP4	YLR375W	78.5	72.7	55.1

## Sheet: Others
orf19 ID	Systematic ORF	S.cerevisiae homolog	Mean	Median	Mode
orf19.5101	CCR4	YAL021C	91	87	66
orf19.5734	POP2	YNR052C	87	81	67
orf19.705	GCN5	YGR252W	79	70	44
orf19.799	STE4	YOR212W	67	59	39
orf19.3023	NGG1	YDR176W	67	55	10
orf19.3683	AGE3	YDL226C	64	55	34
orf19.4312	SPT20	YOL148C	58	51	42
orf19.4222	SST2	YLR452C	58	51	29
orf19.5148	CYR1	YJL005W	60	51	9.3
orf19.736	SRB8	YCR081W	56	48	33
orf19.6022	NRM1		40	35	20
orf19.829	SCH9	YHR205W	41	34	25
orf19.2876	CBF1	YJR060W	57	32	10.8
