# Supplementary material for: The p38/HOG stress-activated protein kinase network couples growth to division in Candida albicans
Source: PLoS Genet. 2019 Mar 28;15(3):e1008052. doi: 10.1371/journal.pgen.1008052 (PMC6456229; doi:10.1371/journal.pgen.1008052)
Supplement: S2 Table — (XLSX) [file pgen.1008052.s008.xlsx]

## Sheet: Description
Table S2
Description
Excel spreadsheet listing C. albicans size mutants. In each collection, mutants for whom median size was increased or decreased by 20% as compared to their parental WT strains are indicated.

## Sheet: Kinase
Kinase and kinase-like mutant collection (Blankenship et al. 2010 PLoS Pathogens)
	Strain.ID	orf19 ID	Name	S.cerevisiae homolog	Mean	Median	Mode
	DAY286	N/A	wild type	N/A	76.8	71.7	18.4
Small mutants	SF009	orf19.3854	SAT4	YCR008W	27.6	19.8	19.1
	jjh119	orf19.4308	HSL1	YKL101W	61.1	30	18.4	HF1
	jjh47	orf19.5350	ScCtk3	YML112W	41.5	31.4	18.4
	SF030	orf19.4297	CKB2	YOR039W	48.7	34.8	18.4
	jjh31	orf19.7388	PBS2	YJL128C	59.5	49.2	34.1
	jmr114	orf19.895	HOG1	YLR113W	52	50.2	40.3
	jjh113	orf19.4909	CBK1	YNL161W	62.1	53.9	18.4	C2
	jjh92	orf19.35	SKY2	YMR216C	61.2	54.6	18.4
	jjh96	orf19.4867	SWE1	YJL187C	49.5	44	28.1
	jjh54	orf19.451	SOK1	YDR006C	67.2	57.3	49.8
Large mutants	BG44-1	orf19.1283	MEC1	YBR136W	91.6	89.4	82.6
	jjh111	orf19.3256	SLN1	YIL147C	90	88	40
	jrb100	orf19.5325	KIN3	YAR018C	91.5	87.4	77.8
	SF013A	orf19.4347		YKL116C	92.4	87.4	59.4
	SF014A	orf19.7510	KIN2	YLR096W	91.1	87.4	78.5
	jjh74	orf19.223	FPK1	YNR047W	90.2	86.7	86
1	Hyperfilamentous mutant
2	Clumpy mutant

## Sheet: TF Homann
TF mutant collection (Homann et al. 2009 PLoS Genetics)
	Strain.ID	orf19 ID	Name	S.cerevisiae homolog	Mean	Median	Mode
Small mutants	SN250	N/A	wild type	N/A	66.6	64.1	56
	153	orf19.3012	ARO81		34	28	15
	156	orf19.610	EFG1		34	28	15	HF
	132	orf19.7381	AHR1		34	34	28
	138	orf19.1187	CPH2	YOR032C	48.3	34.1	18.4
	80	orf19.681	HAP43	YHL009C	40	38	19
	87	orf19.1228	HAP2	YGL237C	42	38	28
	125	orf19.7150	NRG1	YBR066C	47	42	39	HF
	152	orf19.2054	FGR15		48	42	15	HF
	144	orf19.3182	GIS2	YNL255C	51	45	28
	121	orf19.6798	SSN6	YBR112C	53	46	30	HF
	44	orf19.5326	MIG2		53	47	30
	56	orf19.5992	WOR2		54	47	30
	74	orf19.166	ASG1	YIL130W	53	47	28
	81	orf19.837.1	INO4	YOL108C	54	47	29
	85	orf19.1035	WAR1	YML076C	53	47	28
	86	orf19.1168	ZCF3		54	47	30
	89	orf19.1496			53	47	32
Large mutants	95	orf19.2119	NDT80	YHR124W	94.1	94.9	18.4
	161	orf19.4776	LYS143	YDR034C	93.9	92.9	69.6
	134	orf19.4545	SWI4	YER111C	92	91	15
	137	orf19.723	BCR1	YPL230W	93.4	90.1	62.1	HF
	158	orf19.1773	RAP1	YNL216W	93.7	90.1	73.1
	154	orf19.4649	ZCF27		92.1	88.8	97.6
	16	orf19.3809	BAS1	YKR099W	89	88	50
	25	orf19.4225	LEU3	YLR451W	89	88	40
	59	orf19.6124	ACE2		90	88	29
	5	orf19.1499	CTF1		90.5	86.7	69
	110	orf19.4998	ROB1		91.3	86.7	70.3
	139	orf19.1275	GAT1	YFL021W	91.7	85.4	65.6
	63	orf19.6874			91.1	84.7	67.6
	82	orf19.909	STP4	YLR375W	89.2	84.7	78.5
	101	orf19.2842	GZF3	YJL110C	89.8	84	79.9
	112	orf19.5343	ASH1	YKL185W	89.4	84	70.3
	52	orf19.5917	STP1		89.7	84	74.4
	76	orf19.255	ZCF1		89.7	84	69
	88	orf19.1274			89.8	84	74.4
	155	orf19.3252	DAL81	YIR023W	90	84	75.1

## Sheet: Sanglard
Transcriptional regulator mutant collection (Vandeputte et al. 2012 Nature Genetics)
	Strain.ID	orf19 ID	Name	S.cerevisiae homolog	Mean	Median	Mode
	SFY87	N/A	wild type	N/A	78	72.1	53.3
	DAY286	N/A	wild type	N/A	79.3	73.3	57.5
Small mutants	GKO691	orf19.7381	AHR1		53	49	36
	DSY4169-A	orf19.2545	DOT6	YER088C	54	49	35
	DSY4173-A	orf19.6645	HMO1	YDR174W	59	51	30
	DSY4160	orf19.7381	AHR1		60	52.3	40.1
	DSY4173-B	orf19.6645	HMO1	YDR174W	61	53	38
	GKO630	orf19.7381	AHR1		59	54	34
	GKO282	orf19.7381	AHR1		61.2	55	37.1
	DSY4169-B	orf19.2545	DOT6	YER088C	67.3	56.9	31.5
	DSY3452-17	orf19.5953	SFP1	YLR403W	66	57	30
	GKO631	orf19.7381	AHR1		60.1	57.1	30.6
Large mutants	DSY4175-A	orf19.3201	MTLA1	YCR097W	96.6	101.7	116.3
	SFY9	orf19.3969	SFL2	YGR249W	92.5	95.7	96.9	HF
	DSY4171	orf19.5617		YPL181W	86.3	85.4	55.7
	SFY46-2	orf19.1759	PHO23	YNL097C	88.2	85.4	61.8
	GG91-1	orf19.7612	CTM1	YHR109W	87	84.2	70.2

## Sheet: Others
Other mutants
	orf19 ID	Systematic ORF	S.cerevisiae homolog	Mean	Median	Mode
Small mutants	orf19.2876	CBF1	YJR060W	57	32	10.8
	orf19.829	SCH9	YHR205W	41	34	25
	orf19.6022	NRM1		40	35	20
	orf19.736	SRB8	YCR081W	56	48	33
	orf19.4312	SPT8	YLR055C	58	51	42
	orf19.4222	SST2	YLR452C	58	51	29
	orf19.5148	CYR1	YJL005W	60	51	9.3
Large mutants	orf19.705	GCN5	YGR252W	79	70	44
	orf19.5734	POP2	YNR052C	87	81	67
	orf19.5101	CCR4	YAL021C	91	87	66
