# Supplementary material for: The p38/HOG stress-activated protein kinase network couples growth to division in Candida albicans
Source: PLoS Genet. 2019 Mar 28;15(3):e1008052. doi: 10.1371/journal.pgen.1008052 (PMC6456229; doi:10.1371/journal.pgen.1008052)
Supplement: S3 Table — (XLSX) [file pgen.1008052.s009.xlsx]

## Sheet: Description
Table S3
Description
Excel spreadsheet listing C. albicans smallest and largest deletion and conditional mutants. Mutants are arranged according to their functional GO terms.

## Sheet: small size mutants
	Systematic Name	Gene name	Orf19 ID	Median size (fL)	SD on the median size (fL)	Doubling-time (min)	Description
	Cell cycle
	C1_00840C_A	NRM1	orf19.6022	35	0.4	139	Transcriptional regulator of cell cycle gene expression; regulates expression of genes involved in DNA replication stress; interacts with Swi4 and Swi6
	C1_10010C_A	SWE1	orf19.4867	44	1.1	188	Putative protein kinase with a role in control of growth and morphogenesis, required for full virulence
	Translation and ribosome biogenesis
	C5_01910W_A	GIS2	orf19.3182	45	4.3	128	Translational activator for mRNAs with internal ribosome entry sites
	C4_06580W_A	CBF1	orf19.2876	32	1.1	280	Transcription factor; binds ribosomal protein gene promoters and rDNA locus with Tbf1; regulates sulfur starvation-response, respiratory, glycolytic genes; does not bind to centromeres as does S. cerevisiae Cbf1; Spider biofilm repressed
	C2_03940C_A	SCH9	orf19.829	34	0.2	139	Protein kinase; involved in growth control, cell size, resistance to rapamycin, cations, chlamydospore formation, filamentous growth under some conditions, and virulence; prevents hyphal growth in hypoxia at high CO2
	C3_04860W_A	SFP1	orf19.5953	57	2.1	139	C2H2 transcription factor; predicted regulator of ribosomal protein and biogenesis genes
	CR_01580C_A	DOT6	orf19.2545	49	0.2	138	Protein with a predicted role in telomeric gene silencing and filamentation; repressed by high-level peroxide stress
	Signalling
	C2_03330C_A	HOG1	orf19.895	50.2	1.2	136	MAP kinase of osmotic-, heavy metal-, and core stress response
	CR_06040W_A	SAT4	orf19.3854	19.8	5	411	Ser/Thr protein kinase involved in salt tolerance
	C3_06070C_A	PBS2	orf19.7388	49.2	0.7	140	MAPK kinase (MAPKK); role in osmotic and oxidative stress responses, oxidative stress adaptation
	C5_02160W_A	SST2	orf19.4222	51	1.7	190	Predicted regulator of G-protein signaling in mating pathway; null mutation causes alpha-factor hypersensitivity and mating defect
	CR_06000W_A	SOK1	orf19.451	57.3	1.1	141	Protein required for degradation of Nrg1p; mutants are sensitive to growth on hydrogen peroxide medium;
	C2_10700C_A	CTK3	orf19.5350	31.4	1	563	Ortholog(s) have cyclin-dependent protein serine/threonine kinase activity
	C5_02760W_A	CKB2	orf19.4297	34.8	2.1	280	Regulatory subunit of protein kinase CK2 (casein kinase II), beta' subunit; null mutants are hypersensitive to caspofungin
	C7_03070C_A	CYR1	orf19.5148	51	2.1	220	Class III adenylyl cyclase; mutant lacks cAMP; mutant hyphal growth defect rescued by exogenous cAMP; required for mouse mucosal or systemic infection; role in macrophage sensitivity, apoptosis; downstream of Ras1p and CO2 signaling
	C2_06600W_A	SKY2	orf19.35	54.6	2.2	241	Predicted kinase; rat catheter, flow model, Spider biofilm induced
	Transcription
	C5_02900W_A	SPT8	orf19.4312	52.6	3.5	>400	Subunit of the SAGA transcriptional regulatory complex
	C2_01870C_A		orf19.1496	47	1.9	120	Putative transcription factor with zinc finger DNA-binding motif
	CR_02560C_A	ASG1	orf19.166	47	2.1	103	Gal4p family zinc-finger transcription factor with similarity to S. cerevisiae Asg1p
	C3_06000W_A	AHR1	orf19.7381	34	2.1	143	Zn(II)2Cys6 transcription factor; involved in regulation of adhesion genes; involved in white-opaque switch; forms complex with Mcm1
	C1_11520C_A	ZCF3	orf19.1168	47	1.6	118	Zn(II)2Cys6 domain transcription factor; required for filamentous growth, resistance to rapamycin and flucytosine
	C3_05170W_A	WOR2	orf19.5992	47	3.5	96	Zn(II)2Cys6 transcription factor; regulator of white-opaque switching; required for maintenance of opaque state; Hap43-induced
	C6_00280W_A	CPH2	orf19.1187	34.1	3.9	115	Myc-bHLH transcription factor; promotes hyphal growth;
	CR_05670C_A	HMO1	orf19.6645	51	3.1	116	HMG-box transcription factor; binds upstream of hexose and ergosterol metabolism and cell cycle genes
	C2_10540W_A	MIG2	orf19.5326	47	3.9	133	Putative transcription factor with zinc finger DNA-binding motif; possible ortholog of S. cerevisiae Mig2p
	C1_03740W_A	WAR1	orf19.1035	47	2.3	110	Zn(II)2Cys6 transcription factor; plays a role in resistance to weak organic acids; required for yeast cell adherence to silicone substrate
	C2_03840C_A	INO4	orf19.837.1	47	2.5	114	Transcription factor; activator that forms a heterodimer with Ino2; likely regulates genes involved in phosphatidylcholine and phosphatidylinositol biosynthesis, fatty acid beta-oxidation, and peroxisome biogenesis; gene has intron
	C4_05090C_A	SRB8	orf19.736	53.9	2.1	210	Putative RNA polymerase II mediator complex subunit; early-stage flow model biofilm induced
	C1_03200C_A	ARO80	orf19.3012	51.2	1.9	130	Zn(II)2Cys6 transcription factor; transcriptional activator of aromatic amino acid catabolism; regulator of aromatic alcohol biosynthesis via the Ehrlich pathway; mutant is viable
	Cellular respiration
	C1_07680W_A	HAP2	orf19.1228	38	1.9	132	CCAAT-binding transcription factor; regulates low-iron induction of FRP1; in these conditions CBF comprises Hap43 and probably Hap2 and Hap3
	C1_11210C_A	HAP43	orf19.681	38	0.9	130	CCAAT-binding factor-dependent transcription factor; repressor; also called CAP2; required for low iron response; similar to bZIP transcription factor AP-1
	CR_02620C_A		orf19.2821	48.4	1.2	136	Protein of unknown function

## Sheet: Large size mutants
	Systematic Name	Gene name	Orf19 ID	Median size (fL)	SD on the median size (fL)	Description
	Cell cycle G1/S phase transition
	C2_10660W_A	ASH1	orf19.5343	84	3.9	GATA-like transcription factor; localizes to daughter cell, hyphal tip cell nuclei; mRNA localization mediated by She3; required for WT virulence and filamentous growth on solid media; Ras1 repressed in yeast, Cyr1 repressed yeast, hyphae
	CR_07440W_A	ACE2	orf19.6124	88	5.2	Transcription factor; similar to S. cerevisiae Ace2 and Swi5; regulates morphogenesis, cell separation, adherence, virulence in a mice; mutant is hyperfilamentous; rat catheter and Spider biofilm induced
	C1_08220W_A	CCR4	orf19.5101	87	4.3	Component of the Ccr4-Pop2 mRNA deadenylase; transposon mutation affects filamentous growth
	C1_01790W_A	SWI4	orf19.4545	91	6.4	Putative component of the SBF transcription complex involved in G1/S cell-cycle progression; periodic mRNA expression, peak at cell-cycle G1/S phase; predicted, conserved MBF binding sites upstream of G1/S-regulated genes
	Cytokinesis
	C2_10530C_A	KIN3	orf19.5325	87.4	5.9	Protein similar to S. cerevisiae Kin3p; induced under Cdc5p depletion; shows Mob2p-dependent hyphal regulation; mutants are hypersensitive to caspofungin
	CR_00260W_A	KIN2	orf19.7510	87.4	2.5	Protein with similarity to S. cerevisiae Kin2p, transcription is positively regulated by Tbf1
	Transcription
	C5_01740C_A	MTLA1	orf19.3201	101.7	4.1	Homeodomain protein of the MTLa mating type locus; a1 and alpha2 together repress white-opaque switching and mating (an opaque-specific process); a/alpha mating type may increase virulence by competitive advantage; Spider biofilm induced
	C2_10080W_A	RAP1	orf19.1773	90.1	8.1	Transcription factor; binds telomeres and regulatory sequences in DNA; involved in telomere maintenance; represses hyphal growth under yeast-favoring conditions; similar to (but shorter than) S. cerevisiae Rap1
	C2_10220C_A	PHO23	orf19.1759	85.4	3.9	Ortholog(s) have methylated histone residue binding activity
	C5_02180C_A	LEU3	orf19.4225	88	5.9	Zn(II)2Cys6 transcription factor; predicted regulator branched-c ofhain amino acid biosynthesis genes; alkaline induced; induced by Mnl1 under weak acid stress; required for yeast cell adherence to silicone substrate; Spider biofilm induced
	C6_03290W_A		orf19.5617	85.4	4.7	Ortholog(s) have methylated histone residue binding, transcription factor binding activity
	CR_02850C_A	GZF3	orf19.2842	84	3.3	GATA-type transcription factor; oxidative stress-induced via Cap1; mutant has abnormal colony morphology and altered sensitivity to fluconazole, LiCl, and copper; Spider biofilm induced
	C5_03150W_A		orf19.4347	87.4	1.2	Putative serine/threonine protein kinase; Hog1p-induced
	CR_06710C_A	GCN5	orf19.705	70	0.9	Putative histone acetyltransferase; mutation confers hypersensitivity to 5-fluorouracil (5-FU); possibly an essential gene, disruptants not obtained by UAU1 method
	C4_01380W_A	ZCF27	orf19.4649	88.8	1.1	Putative Zn(II)2Cys6 transcription factor
	C4_04730W_A	BAS1	orf19.3809	88	3.2	Putative Myb-like transcription factor; ortholog S. cerevisiae Bas1, a regulator of purine biosynthetic genes; mutant exhibits adenine auxotrophy and abnormal colony morphology
	C2_00140W_A	NDT80	orf19.2119	94.9	2.9	Ortholog of Ndt80; meiosis-specific transcription factor; activator of CDR1 induction by antifungal drugs; required for wild-type drug resistance and for Spider biofilm formation; transcript induced by antifungal drug treatment
	C1_02720W_A		orf19.2961	82.7	1.2	Putative transcription factor with zinc finger DNA-binding motif
	C4_02490W_A	ZCF15	orf19.2753	82.7	1.7	Predicted Zn(II)2Cys6 transcription factor of unknown function; rat catheter biofilm induced
	C3_04580C_A	STP1	orf19.5917	84	1	Transcription factor; regulates SAP2, OPT1 expression and thereby protein catabolism for nitrogen source; activated via amino-acid-induced proteolytic processing; macrophage/pseudohyphal-repressed; Spider biofilm repressed
	C3_02640C_A	ZCF1	orf19.255	84	2	Zn(II)2Cys6 transcription factor; transcript regulated during hypha formation; 5'-UTR intron; mutants show decreased colonization of mouse kidneys; flow model biofilm induced; Spider biofilm induced
	C2_01890W_A	CTF1	orf19.1499	86.7	2.3	Putative zinc-finger transcription factor, similar to A. nidulans FarA and FarB; activates genes required for fatty acid degradation; induced by oleate; null mutant displays carbon source utilization defects and slightly reduced virulence
	CR_01030W_A	DAL81	orf19.3252	84	1.7	Zn(II)2Cys6 transcription factor; ortholog of S. cerevisiae Dal81, involved in the regulation of nitrogen-degradation genes; required for yeast cell adherence to silicone substrate; Spider biofilm induced
	C2_03220C_A	STP4	orf19.909	84.7	1.2	C2H2 transcription factor; induced in core caspofungin response; colony morphology-related gene regulation by Ssn6; induced by 17-beta-estradiol, ethynyl estradiol; rat catheter and Spider biofilm induced
	C1_13620W_A	ROB1	orf19.4998	86.7	2.2	Zn(II)2Cys6 transcription factor; required for Spider model biofilm formation; mutant displays abnormal colony morphology and invasive growth; caspofungin repressed; flow model biofilm induced; rat catheter biofilm repressed
	C1_09180W_A	LYS143	orf19.4776	92.9	3.3	Zn(II)2Cys6 transcription factor; ortholog of S. cerevisiae Lys14 involved in the regulation of lysine biosynthesis genes
	C4_05880W_A	GAT1	orf19.1275	85.4	1.4	GATA-type transcription factor; regulator of nitrogen utilization; required for nitrogen catabolite repression and utilization of isoleucine, tyrosine and tryptophan N sources; required for virulence in a mouse systemic infection model
	C6_03650C_A	POP2	orf19.5734	81	3	Component of the Ccr4-Pop2 mRNA deadenylase; heterozygous null mutant exhibits resistance to parnafungin and cordycepin in the C. albicans fitness test
	C4_05870C_A		orf19.1274	84	3.2	Has domain(s) with predicted DNA binding, zinc ion binding activity, role in transcription, DNA-templated and nucleus localizatio
	C2_05640W_A		orf19.6874	84.7	4	Putative helix-loop-helix (HLH) transcription factor with a role in filamentous growth
	Signalling
	CR_01000C_A	SLN1	orf19.3256	88	1.2	Histidine kinase involved in a two-component signaling pathway that regulates cell wall biosynthesis; mutants are sensitive to growth on H2O2 medium; rat catheter and Spider biofilm induced
	Cell cycle
	C5_04060C_A	MEC1	orf19.1283	89.4	2.3	Cell cycle checkpoint protein with a role in genome integrity; RNA abundance regulated by tyrosol and cell density
	Cytoskeleton organization
	CR_02040W_A	PRK1	orf19.2605	84.2	1.1	Putative protein serine/threonine kinase; mutants sensitive to growth on hydrogen peroxide medium
	Other and uknown functions
	C2_08860W_A		orf19.223	86.7	0.9	Putative serine/threonine protein kinase; Hap43-repressed; induced by prostaglandins; possibly an essential gene, disruptants not obtained by UAU1 method; flow model biofilm induced; Spider biofilm induced
	CR_10360C_A	CTM1	orf19.7612	84.2	1.2	Putative cytochrome c lysine methyltransferase; regulated by Gcn2 and Gcn4; transcript induced by Mnl1 under weak acid stress; early-stage flow model biofilm induced

## Sheet: Doubling time WT strains
		WT strains	Doubling-time (min)	SD on Doubling-time (min)
		SC5314	138
		DAY286	144
		SN250	139
		SFY87	138
		CAI4	144
