# Supplementary material for: The p38/HOG stress-activated protein kinase network couples growth to division in Candida albicans
Source: PLoS Genet. 2019 Mar 28;15(3):e1008052. doi: 10.1371/journal.pgen.1008052 (PMC6456229; doi:10.1371/journal.pgen.1008052)
Supplement: S4 Table — (XLSX) [file pgen.1008052.s010.xlsx]

## Sheet: Description
Table S4
Description
Gene Stet Enrichment Analysis (GSEA) of the hog1 transcriptome.
SIZE: Number of genes in gene set
NES: Normalized Enrichment Score
NOM p-val: Normalized p-value
FDR q-val: False Discovery Rate q-value

## Sheet: GSEA positive correlation
GSEA positive correlation
NAME	SIZE	ES	NES	NOM p-val	FDR q-val	FWER p-val	RANK AT MAX	LEADING EDGE
CDC53_DN	232	0.612734	4.94229	0	0	0	882	tags=48%, list=14%, signal=53%
BIOFILMBATCH_UP	207	0.581927	4.62383	0	0	0	859	tags=44%, list=13%, signal=50%
RAS1_YEAST_UP	68	0.723954	4.55716	0	0	0	590	tags=62%, list=9%, signal=67%
CHITIN- AND BETA-GLUCAN-CONTAINING CELL WALL_CEL	114	0.63152	4.47454	0	0	0	342	tags=25%, list=5%, signal=26%
CELL WALL_CEL	128	0.603408	4.46008	0	0	0	342	tags=23%, list=5%, signal=24%
EFG1_HYPHAE_DN	40	0.817157	4.39085	0	0	0	399	tags=58%, list=6%, signal=61%
CDC5_9H_UP	152	0.58171	4.37219	0	0	0	968	tags=47%, list=15%, signal=54%
HYPHAE_FBS_37_UP	51	0.764907	4.35261	0	0	0	227	tags=43%, list=4%, signal=44%
EXTERNAL ENCAPSULATING STRUCTURE_CEL	128	0.603408	4.31399	0	0	0	342	tags=23%, list=5%, signal=24%
TAC1_DN	55	0.714946	4.20757	0	0	0	418	tags=56%, list=6%, signal=60%
HYPOXIA_UP	48	0.731164	4.19009	0	0	0	377	tags=42%, list=6%, signal=44%
CICLOPIROX_OLAMINE_UP	52	0.71113	4.08269	0	0	0	327	tags=35%, list=5%, signal=36%
CELL SURFACE_CEL	161	0.534857	4.07945	0	0	0	495	tags=24%, list=8%, signal=25%
YAK1_Y_UP	97	0.589129	4.07322	0	0	0	768	tags=36%, list=12%, signal=40%
PSEUDOMONAS_DN	105	0.568763	3.96453	0	0	0	303	tags=26%, list=5%, signal=27%
HYPHAE FBS37 (NANTEL)_UP	129	0.538337	3.94334	0	0	0	211	tags=16%, list=3%, signal=16%
OS_UP	174	0.507169	3.87755	0	0	0	894	tags=43%, list=14%, signal=49%
BIOFILM FORMATION_BIO	29	0.800363	3.80454	0	0	0	23	tags=24%, list=0%, signal=24%
CDC5_7H_UP	399	0.438793	3.79261	0	4.32156e-05	0.001	943	tags=38%, list=15%, signal=42%
CDC35_HYPHAE_UP	359	0.448587	3.74476	0	4.10549e-05	0.001	1259	tags=48%, list=20%, signal=56%
ZAP1-UP	228	0.461247	3.73928	0	3.90999e-05	0.001	491	tags=24%, list=8%, signal=25%
SINGLE-SPECIES BIOFILM FORMATION ON INANIMATE SUBSTRATE_BIO	19	0.884789	3.72699	0	3.73226e-05	0.001	23	tags=37%, list=0%, signal=37%
SINGLE-SPECIES BIOFILM FORMATION_BIO	20	0.87743	3.67763	0	3.56999e-05	0.001	23	tags=35%, list=0%, signal=35%
RAS1_HYPHAE_DN	41	0.672473	3.6667	0	3.42124e-05	0.001	227	tags=24%, list=4%, signal=25%
RIM101Ã†NRG1_DOWN	200	0.464543	3.6629	0	3.28439e-05	0.001	1149	tags=39%, list=18%, signal=46%
MULTI-ORGANISM PROCESS_BIO	239	0.451923	3.64833	0	3.15807e-05	0.001	1028	tags=31%, list=16%, signal=35%
NRG1-TFBIND	162	0.475405	3.64153	0	3.0411e-05	0.001	1083	tags=37%, list=17%, signal=43%
INTRASPECIES INTERACTION BETWEEN ORGANISMS_BIO	19	0.884789	3.62322	0	2.93249e-05	0.001	23	tags=37%, list=0%, signal=37%
INTERSPECIES INTERACTION BETWEEN ORGANISMS_BIO	178	0.461783	3.60226	0	2.83137e-05	0.001	1324	tags=41%, list=21%, signal=50%
SYMBIOSIS, ENCOMPASSING MUTUALISM THROUGH PARASITISM_BIO	178	0.461783	3.59067	0	2.73699e-05	0.001	1324	tags=41%, list=21%, signal=50%
MATING_UP	42	0.637315	3.5593	0	8.02798e-05	0.003	4	tags=7%, list=0%, signal=7%
LATE BIOFILM_UP	61	0.573412	3.51474	0	7.7771e-05	0.003	346	tags=39%, list=5%, signal=41%
BIOLOGICAL ADHESION_BIO	46	0.623114	3.50669	0	7.54143e-05	0.003	138	tags=22%, list=2%, signal=22%
PATHOGENESIS_BIO	143	0.477963	3.50595	0	7.31962e-05	0.003	1048	tags=35%, list=16%, signal=41%
DFG16_UP	30	0.721865	3.49621	0	9.47243e-05	0.004	367	tags=40%, list=6%, signal=42%
TSA1_Â·-MEM_DN	17	0.871193	3.48691	0	9.20931e-05	0.004	138	tags=41%, list=2%, signal=42%
HYPHAL CELL WALL_CEL	35	0.677506	3.46329	0	0.000134223	0.006	227	tags=29%, list=4%, signal=29%
RHE30_UP	176	0.449143	3.42567	0	0.000174219	0.008	936	tags=34%, list=14%, signal=39%
RHE90_UP	216	0.431038	3.41651	0	0.000169752	0.008	1128	tags=36%, list=17%, signal=42%
UPC2-G648D_UP	31	0.686809	3.40569	0	0.000165508	0.008	382	tags=42%, list=6%, signal=44%
BMDM PHAGOCYTOSIS_UP	468	0.384089	3.40157	0	0.000201773	0.01	1241	tags=38%, list=19%, signal=44%
DFG16_DN	31	0.669424	3.32032	0	0.000570113	0.027	227	tags=23%, list=4%, signal=23%
IRON ION HOMEOSTASIS_BIO	31	0.654934	3.28805	0	0.000749705	0.036	274	tags=26%, list=4%, signal=27%
CELL ADHESION_BIO	28	0.691722	3.26527	0	0.000901789	0.043	79	tags=29%, list=1%, signal=29%
RAS1_HYPHAE_UP	35	0.63227	3.25152	0	0.000973273	0.048	715	tags=54%, list=11%, signal=61%
YEAST-FORM CELL WALL_CEL	32	0.651384	3.2122	0	0.00140252	0.072	340	tags=28%, list=5%, signal=30%
YAK1_H_UP	427	0.369875	3.1981	0	0.00153086	0.079	893	tags=27%, list=14%, signal=29%
NITROSATIVE STRESS	64	0.514562	3.14375	0	0.00234406	0.12	284	tags=22%, list=4%, signal=23%
INTERACTION WITH HOST_BIO	73	0.482354	3.12324	0	0.0025337	0.133	1323	tags=47%, list=20%, signal=58%
DI-, TRI-VALENT INORGANIC CATION HOMEOSTASIS_BIO	51	0.525706	3.05385	0	0.00430441	0.226	283	tags=18%, list=4%, signal=18%
TRANSITION METAL ION HOMEOSTASIS_BIO	46	0.549409	3.04432	0	0.0045447	0.242	274	tags=17%, list=4%, signal=18%
METAL ION HOMEOSTASIS_BIO	55	0.501198	3.0095	0	0.00546014	0.288	283	tags=16%, list=4%, signal=17%
HU_6H_UP	251	0.371215	2.99881	0	0.00563834	0.3	1033	tags=34%, list=16%, signal=39%
RESPONSE TO TEMPERATURE STIMULUS_BIO	20	0.68461	2.99663	0	0.00564132	0.305	464	tags=50%, list=7%, signal=54%
NDT80_UP	71	0.464187	2.96755	0	0.00695313	0.364	1283	tags=54%, list=20%, signal=66%
OPAQUE_2_UP	290	0.360352	2.96408	0	0.00697693	0.37	310	tags=19%, list=5%, signal=19%
G1-S CLUSTER	193	0.369382	2.94266	0	0.00768282	0.401	2335	tags=64%, list=36%, signal=98%
YAK1_Y_DN	202	0.373053	2.94167	0	0.00765061	0.404	495	tags=21%, list=8%, signal=22%
CELL CYCLE-MODULATED	492	0.334538	2.93363	0	0.00790053	0.42	2398	tags=59%, list=37%, signal=87%
ADHESION TO OTHER ORGANISM DURING SYMBIOTIC INTERACTION_BIO	34	0.5631	2.92653	0	0.00830704	0.442	138	tags=18%, list=2%, signal=18%
RIM101_DN	28	0.597484	2.89863	0.00120627	0.00974723	0.503	632	tags=39%, list=10%, signal=43%
RHE30_DN	267	0.352949	2.89276	0	0.0100035	0.518	286	tags=10%, list=4%, signal=11%
SKO1_UP	447	0.330757	2.89243	0	0.00988392	0.519	431	tags=15%, list=7%, signal=15%
S-G2 CLUSTER	107	0.405376	2.86946	0	0.0112701	0.57	1539	tags=58%, list=24%, signal=75%
ADHESION TO HOST_BIO	34	0.5631	2.84898	0	0.0124356	0.614	138	tags=18%, list=2%, signal=18%
CELL-CELL ADHESION_BIO	15	0.727583	2.84226	0	0.0127991	0.626	20	tags=27%, list=0%, signal=27%
HYPHAE FBS37 (NANTEL)_DN	74	0.439115	2.83306	0.00104603	0.0133508	0.65	867	tags=28%, list=13%, signal=32%
RESPONSE TO HEAT_BIO	18	0.685686	2.82201	0.00130378	0.0143604	0.688	464	tags=50%, list=7%, signal=54%
PMT1_CAP1-312_UP	56	0.470347	2.80998	0	0.0153398	0.724	45	tags=7%, list=1%, signal=7%
HYPHAE_UP	198	0.355358	2.77881	0	0.0184693	0.792	274	tags=10%, list=4%, signal=10%
ALPHA_PHEROMONE_UP	32	0.540895	2.7419	0	0.0236003	0.874	948	tags=38%, list=15%, signal=44%
HU_2H_UP	153	0.356951	2.72603	0	0.0259537	0.892	1574	tags=41%, list=24%, signal=52%
CELL HOMEOSTASIS_BIO	93	0.393397	2.67995	0	0.0353251	0.967	410	tags=16%, list=6%, signal=17%
PMN PHAGOCYTOSIS_UP	190	0.338397	2.66874	0	0.0377695	0.978	839	tags=28%, list=13%, signal=32%
CA21CHR4X4	117	0.371776	2.66382	0.00102145	0.038371	0.98	131	tags=5%, list=2%, signal=5%
REGULATION OF BIOLOGICAL QUALITY_BIO	152	0.358371	2.66175	0.00101317	0.0383125	0.981	555	tags=17%, list=9%, signal=18%
WHITE_2_UP	433	0.304668	2.64961	0	0.041495	0.99	653	tags=16%, list=10%, signal=17%
HYPHAL GROWTH_BIO	137	0.353698	2.64083	0	0.0436818	0.993	2368	tags=57%, list=37%, signal=88%
EARLY BIOFILM_UP	84	0.398601	2.62658	0.00105485	0.0473672	0.995	1388	tags=45%, list=21%, signal=57%
CATION HOMEOSTASIS_BIO	77	0.401355	2.60478	0.00105374	0.0546645	0.997	283	tags=12%, list=4%, signal=12%
NUCLEAR CHROMOSOME_CEL	40	0.46856	2.57729	0.00116414	0.0650607	0.999	2387	tags=80%, list=37%, signal=126%
CELL ION HOMEOSTASIS_BIO	77	0.401355	2.57361	0.00313152	0.0658835	0.999	283	tags=12%, list=4%, signal=12%
GCN4_GCN2_UP	83	0.387375	2.55838	0.00104384	0.0718848	1	18	tags=5%, list=0%, signal=5%
RESPONSE TO ABIOTIC STIMULUS_BIO	89	0.375637	2.5196	0.00104493	0.0884853	1	325	tags=20%, list=5%, signal=21%
PLASMA MEMBRANE_CEL	251	0.312716	2.51694	0	0.0887018	1	1832	tags=40%, list=28%, signal=54%

## Sheet: GSEA negative correlation
GSEA negative correlation
NAME	SIZE	ES	NES	NOM p-val	FDR q-val	FWER p-val	RANK AT MAX	LEADING EDGE
MITOCHONDRIAL PART_CEL	267	-0.19545	-5.47254	0	0	0	4156	tags=87%, list=64%, signal=233%
MITOCHONDRIAL MEMBRANE PART_CEL	46	-0.582379	-5.12636	0	0	0	1888	tags=89%, list=29%, signal=125%
ORGANELLE INNER MEMBRANE_CEL	111	-0.321634	-4.81943	0	0	0	2368	tags=74%, list=37%, signal=115%
MITOCHONDRIAL ENVELOPE_CEL	152	-0.288271	-4.62433	0	0	0	2368	tags=70%, list=37%, signal=109%
MITOCHONDRIAL MEMBRANE_CEL	124	-0.309364	-4.48155	0	0	0	2368	tags=73%, list=37%, signal=112%
MITOCHONDRION_CEL	379	-0.170249	-4.35567	0	0	0	3400	tags=74%, list=53%, signal=146%
MITOCHONDRIAL INNER MEMBRANE_CEL	107	-0.331454	-4.29556	0	0	0	2368	tags=75%, list=37%, signal=116%
BIOFILMBATCH_DN	137	-0.262118	-4.11241	0	0	0	2591	tags=78%, list=40%, signal=128%
NO_DN	62	-0.408683	-4.06217	0	0	0	2805	tags=87%, list=43%, signal=153%
OXIDATIVE PHOSPHORYLATION_BIO	24	-0.650624	-3.97192	0	0	0	1888	tags=96%, list=29%, signal=135%
STRUCTURAL CONSTITUENT OF RIBOSOME_MOL	145	-0.252117	-3.9216	0	0	0	3540	tags=82%, list=55%, signal=178%
HYPOXIA_DN	22	-0.614428	-3.63706	0	0	0	2099	tags=95%, list=33%, signal=141%
PWY-3781_PATH	23	-0.562388	-3.41927	0	0	0	1884	tags=87%, list=29%, signal=122%
ENVELOPE_CEL	215	-0.154907	-3.04071	0	0	0	1948	tags=53%, list=30%, signal=73%
LARGE RIBOSOMAL SUBUNIT_CEL	86	-0.242859	-2.9517	0	0.000122924	0.001	3448	tags=80%, list=53%, signal=170%
NUCLEOSIDE TRIPHOSPHATE METABOLIC PROCESS_BIO	15	-0.617911	-2.91764	0	0.000240844	0.002	1888	tags=93%, list=29%, signal=132%
MONOVALENT INORGANIC CATION TRANSPORT_BIO	17	-0.551074	-2.87233	0	0.000456248	0.004	1419	tags=82%, list=22%, signal=105%
PET8_SGA	66	-0.264229	-2.74158	0	0.00115514	0.011	2457	tags=70%, list=38%, signal=111%
HYDROGEN ION TRANSPORTER ACTIVITY_MOL	32	-0.37739	-2.65889	0	0.00183182	0.018	1888	tags=72%, list=29%, signal=101%
MITOCHONDRIAL TRANSPORT_BIO	40	-0.324352	-2.65839	0	0.00176136	0.018	3985	tags=95%, list=62%, signal=247%
PEP12_SGA	47	-0.290723	-2.62426	0	0.00215383	0.023	1721	tags=62%, list=27%, signal=84%
PROTEASOME CORE COMPLEX (SENSU EUKARYOTA)_CEL	15	-0.523418	-2.60645	0	0.00224673	0.025	2461	tags=93%, list=38%, signal=150%
MONOVALENT INORGANIC CATION TRANSPORTER ACTIVITY_MOL	35	-0.343279	-2.58881	0	0.00225051	0.026	1888	tags=69%, list=29%, signal=96%
PROTEASOME COMPLEX (SENSU EUKARYOTA)_CEL	43	-0.302482	-2.56256	0	0.00288588	0.035	2044	tags=67%, list=32%, signal=98%
ORGANELLE ENVELOPE_CEL	215	-0.154907	-2.53796	0	0.00339284	0.043	1948	tags=53%, list=30%, signal=73%
TBF1_TFBIND	114	-0.173244	-2.53665	0	0.00328681	0.043	2304	tags=59%, list=36%, signal=90%
PWY3B3-100_PATH	17	-0.488503	-2.52449	0	0.00333019	0.045	2802	tags=94%, list=43%, signal=166%
TRANSLATION_BIO	245	-0.176206	-2.49497	0	0.00430671	0.06	4124	tags=84%, list=64%, signal=223%
ION TRANSPORTER ACTIVITY_MOL	105	-0.179024	-2.48561	0	0.00446582	0.064	2033	tags=58%, list=31%, signal=83%
EUKARYOTIC 48S INITIATION COMPLEX_CEL	38	-0.312949	-2.48314	0	0.00441959	0.067	3413	tags=87%, list=53%, signal=183%
LIGASE ACTIVITY, FORMING CARBON-OXYGEN BONDS_MOL	35	-0.319341	-2.47937	0	0.00430329	0.067	2927	tags=80%, list=45%, signal=146%
SMALL RIBOSOMAL SUBUNIT_CEL	62	-0.234202	-2.464	0	0.00466912	0.073	3621	tags=82%, list=56%, signal=186%
GROUP TRANSFER COENZYME METABOLIC PROCESS_BIO	25	-0.386271	-2.45906	0	0.00468066	0.075	3219	tags=92%, list=50%, signal=183%
AMINOACYL-TRNA LIGASE ACTIVITY_MOL	35	-0.319341	-2.4215	0	0.00538169	0.088	2927	tags=80%, list=45%, signal=146%
PROTEIN TARGETING TO MITOCHONDRION_BIO	35	-0.324689	-2.41762	0	0.00536946	0.089	3929	tags=94%, list=61%, signal=240%
TRNA-CHARGING_PATH	35	-0.319341	-2.40754	0	0.00552725	0.093	2927	tags=80%, list=45%, signal=146%
TRNA AMINOACYLATION FOR PROTEIN TRANSLATION_BIO	18	-0.447444	-2.40563	0	0.00545538	0.094	3177	tags=94%, list=49%, signal=185%
ESTABLISHMENT OF PROTEIN LOCALIZATION_BIO	195	-0.108688	-2.40105	0	0.00559659	0.098	5204	tags=94%, list=81%, signal=469%
LIGASE ACTIVITY, FORMING AMINOACYL-TRNA AND RELATED COMPOUNDS_MOL	35	-0.319341	-2.39403	0	0.00579137	0.103	2927	tags=80%, list=45%, signal=146%
TRNA AMINOACYLATION_BIO	18	-0.447444	-2.39162	0	0.00566815	0.103	3177	tags=94%, list=49%, signal=185%
YHR020W_DAMP_SGA	63	-0.236995	-2.34883	0	0.00708843	0.129	2315	tags=67%, list=36%, signal=103%
CATION TRANSPORTER ACTIVITY_MOL	86	-0.187596	-2.34874	0	0.00694377	0.129	1973	tags=58%, list=31%, signal=83%
CELLULAR RESPIRATION_BIO	69	-0.230409	-2.33708	0	0.00723631	0.137	2099	tags=62%, list=33%, signal=91%
JEN1_SGA	23	-0.375375	-2.29039	0	0.0103939	0.198	2349	tags=78%, list=36%, signal=123%
LAT1_SGA	50	-0.248663	-2.28475	0.0102041	0.0105298	0.205	2431	tags=68%, list=38%, signal=108%
ERV15_SGA	73	-0.208321	-2.26211	0	0.0114082	0.224	2329	tags=63%, list=36%, signal=97%
AEROBIC RESPIRATION_BIO	68	-0.22437	-2.25642	0	0.0115042	0.229	2099	tags=62%, list=33%, signal=91%
COX6_SGA	73	-0.199069	-2.24715	0	0.0122752	0.246	1764	tags=55%, list=27%, signal=75%
IRC20_SGA	18	-0.41739	-2.21911	0	0.0141436	0.277	2876	tags=89%, list=45%, signal=160%
COFACTOR METABOLIC PROCESS_BIO	119	-0.143514	-2.21477	0	0.0142851	0.283	2617	tags=61%, list=41%, signal=101%
MODIFICATION-DEPENDENT MACROMOLECULE CATABOLIC PROCESS_BIO	69	-0.201896	-2.21005	0	0.014284	0.289	2119	tags=59%, list=33%, signal=88%
UBIQUITIN-DEPENDENT PROTEIN CATABOLIC PROCESS_BIO	69	-0.201896	-2.20876	0	0.014125	0.291	2119	tags=59%, list=33%, signal=88%
MODIFICATION-DEPENDENT PROTEIN CATABOLIC PROCESS_BIO	69	-0.201896	-2.20098	0	0.0149256	0.31	2119	tags=59%, list=33%, signal=88%
TRICARBOXYLIC ACID CYCLE INTERMEDIATE METABOLIC PROCESS_BIO	21	-0.3901	-2.19283	0.00505051	0.0153075	0.319	2802	tags=86%, list=43%, signal=151%
FHL1_TFBIND	107	-0.159647	-2.16851	0	0.0175357	0.362	2760	tags=64%, list=43%, signal=111%
COENZYME METABOLIC PROCESS_BIO	94	-0.164782	-2.1677	0	0.0173733	0.364	3287	tags=73%, list=51%, signal=147%
PXA1_SGA	29	-0.316192	-2.16269	0	0.0175407	0.374	2225	tags=72%, list=34%, signal=110%
PURINE RIBONUCLEOTIDE BIOSYNTHETIC PROCESS_BIO	20	-0.385814	-2.16045	0.00429185	0.0173769	0.376	2000	tags=75%, list=31%, signal=108%
COFACTOR CATABOLIC PROCESS_BIO	17	-0.420181	-2.15801	0.00421941	0.0173619	0.381	2802	tags=88%, list=43%, signal=155%
SEC61-2_SGA	125	-0.13382	-2.15693	0	0.0172116	0.384	2036	tags=50%, list=32%, signal=72%
COENZYME CATABOLIC PROCESS_BIO	17	-0.420181	-2.14736	0	0.0176666	0.4	2802	tags=88%, list=43%, signal=155%
AIM22_SGA	88	-0.167433	-2.14392	0	0.017688	0.405	2500	tags=61%, list=39%, signal=99%
PROTEASOME REGULATORY PARTICLE (SENSU EUKARYOTA)_CEL	21	-0.37248	-2.13918	0.00469484	0.0179325	0.416	1922	tags=71%, list=30%, signal=101%
CWT1_STATPHASE_UP	75	-0.188234	-2.11965	0	0.0196394	0.45	2378	tags=63%, list=37%, signal=98%
GENERATION OF PRECURSOR METABOLITES AND ENERGY_BIO	128	-0.14335	-2.10366	0	0.0217056	0.487	2099	tags=56%, list=33%, signal=82%
ACETYL-COA CATABOLIC PROCESS_BIO	16	-0.412666	-2.0716	0	0.0259576	0.55	2802	tags=88%, list=43%, signal=154%
HYDROLASE ACTIVITY, ACTING ON ACID ANHYDRIDES, CATALYZING TRANSMEMBRANE MOVEMENT OF SUBSTANCES_MOL	62	-0.198241	-2.0698	0	0.0257688	0.553	2355	tags=63%, list=36%, signal=98%
AMINO ACID ACTIVATION_BIO	23	-0.332337	-2.05956	0	0.0271308	0.577	3999	tags=96%, list=62%, signal=250%
TRICARBOXYLIC ACID CYCLE_BIO	16	-0.412666	-2.05572	0.0159363	0.0273054	0.584	2802	tags=88%, list=43%, signal=154%
ENDOSOME_CEL	32	-0.276939	-2.05429	0.00662252	0.027412	0.588	2697	tags=75%, list=42%, signal=128%
ADH3_SGA	66	-0.184561	-2.04538	0	0.0283466	0.604	1983	tags=56%, list=31%, signal=80%
ELECTRON TRANSPORT_BIO	18	-0.372851	-2.03755	0.00858369	0.0293535	0.616	1876	tags=72%, list=29%, signal=102%
IFH1_TFBIND	103	-0.16181	-2.03157	0	0.0300358	0.629	2760	tags=65%, list=43%, signal=112%
UBP6_SGA	131	-0.130805	-2.02053	0	0.0313749	0.649	2651	tags=60%, list=41%, signal=100%
MITOCHONDRIAL MATRIX_CEL	120	-0.137514	-2.0184	0	0.0316227	0.658	3540	tags=73%, list=55%, signal=158%
SOR2_SGA	48	-0.223718	-1.98827	0	0.038212	0.727	2571	tags=69%, list=40%, signal=113%
ATPASE ACTIVITY, COUPLED TO MOVEMENT OF SUBSTANCES_MOL	62	-0.198241	-1.98422	0	0.0385791	0.731	2355	tags=63%, list=36%, signal=98%
ATPASE ACTIVITY, COUPLED TO TRANSMEMBRANE MOVEMENT OF SUBSTANCES_MOL	62	-0.198241	-1.97231	0	0.040663	0.754	2355	tags=63%, list=36%, signal=98%
PUS4_SGA	55	-0.205458	-1.96481	0	0.0421204	0.769	2982	tags=73%, list=46%, signal=134%
EUKARYOTIC 43S PREINITIATION COMPLEX_CEL	43	-0.233605	-1.94899	0	0.0457527	0.799	3496	tags=81%, list=54%, signal=176%
TSA1_DN	16	-0.383201	-1.94813	0.00803213	0.0454223	0.8	1286	tags=69%, list=20%, signal=86%
RSC4-2_SGA	108	-0.132471	-1.93581	0	0.0483273	0.822	2419	tags=59%, list=37%, signal=93%
PROTEOLYSIS INVOLVED IN CELLULAR PROTEIN CATABOLIC PROCESS_BIO	70	-0.19381	-1.92876	0	0.050093	0.842	2119	tags=59%, list=33%, signal=86%
HYDROGEN ION TRANSPORTING ATPASE ACTIVITY, ROTATIONAL MECHANISM_MOL	22	-0.332902	-1.92738	0.010582	0.0499616	0.842	1888	tags=68%, list=29%, signal=96%
PRIMARY ACTIVE TRANSPORTER ACTIVITY_MOL	31	-0.272135	-1.92455	0.0120482	0.0502703	0.848	1888	tags=65%, list=29%, signal=91%
FYV10_SGA	79	-0.162901	-1.9161	0	0.052541	0.867	4645	tags=91%, list=72%, signal=321%
ATPASE ACTIVITY, COUPLED TO TRANSMEMBRANE MOVEMENT OF IONS_MOL	32	-0.27626	-1.91011	0	0.0539205	0.877	1952	tags=66%, list=30%, signal=94%
YBR238C_SGA	91	-0.150155	-1.89264	0	0.0585066	0.904	2501	tags=59%, list=39%, signal=96%
COFACTOR BIOSYNTHETIC PROCESS_BIO	51	-0.212628	-1.88847	0.0215054	0.0590219	0.909	1459	tags=51%, list=23%, signal=65%
MITOCHONDRIAL LUMEN_CEL	120	-0.137514	-1.88733	0.0476191	0.0588309	0.91	3540	tags=73%, list=55%, signal=158%
ENDOPLASMIC RETICULUM MEMBRANE_CEL	84	-0.156256	-1.88342	0	0.0595521	0.916	3124	tags=70%, list=48%, signal=134%
BAP2_SGA	31	-0.26131	-1.87852	0.00609756	0.0608578	0.919	2573	tags=71%, list=40%, signal=117%
PURINE NUCLEOTIDE BIOSYNTHETIC PROCESS_BIO	23	-0.308236	-1.87769	0.0103627	0.0606329	0.92	3070	tags=83%, list=48%, signal=157%
P-P-BOND-HYDROLYSIS-DRIVEN TRANSPORTER ACTIVITY_MOL	31	-0.272135	-1.87514	0.025641	0.0609582	0.923	1888	tags=65%, list=29%, signal=91%
HYPHAE_FBS_37_DN	45	-0.213782	-1.86495	0	0.0637455	0.93	2160	tags=73%, list=33%, signal=109%
TYS1-1_SGA	119	-0.131224	-1.85549	0	0.0663917	0.94	1874	tags=48%, list=29%, signal=66%
REGULATION OF PH_BIO	20	-0.328979	-1.84592	0.012987	0.0691143	0.949	2815	tags=80%, list=44%, signal=141%
PEROXISOME ORGANIZATION AND BIOGENESIS_BIO	19	-0.331676	-1.83848	0.00446429	0.0707724	0.951	4322	tags=100%, list=67%, signal=302%
YJR120W_SGA	140	-0.139301	-1.83433	0	0.0718753	0.954	2540	tags=59%, list=39%, signal=96%
BAT1_SGA	104	-0.138258	-1.82888	0.0277778	0.0730123	0.963	3500	tags=73%, list=54%, signal=157%
COENZYME BIOSYNTHETIC PROCESS_BIO	37	-0.233099	-1.8238	0.00680272	0.0744377	0.968	2397	tags=68%, list=37%, signal=107%
NUCLEAR ENVELOPE-ENDOPLASMIC RETICULUM NETWORK_CEL	88	-0.145167	-1.81995	0	0.0754457	0.969	3124	tags=69%, list=48%, signal=132%
PURINE RIBONUCLEOTIDE METABOLIC PROCESS_BIO	22	-0.305928	-1.81816	0.0196078	0.0753317	0.969	2000	tags=68%, list=31%, signal=98%
STV1_SGA	34	-0.252897	-1.81742	0.0078125	0.0750305	0.969	1594	tags=56%, list=25%, signal=74%
RCN1_SGA	26	-0.269954	-1.81574	0	0.0749029	0.972	2286	tags=69%, list=35%, signal=107%
PROTON-TRANSPORTING TWO-SECTOR ATPASE COMPLEX_CEL	28	-0.266118	-1.80977	0.0116279	0.0766777	0.976	2553	tags=71%, list=40%, signal=118%
MGR1_SGA	138	-0.129695	-1.79108	0	0.0836636	0.987	2651	tags=60%, list=41%, signal=100%
SKI3_SGA	56	-0.179277	-1.78563	0.0116279	0.0857711	0.987	2681	tags=64%, list=42%, signal=109%
INTRACELLULAR PROTEIN TRANSPORT_BIO	180	-0.100624	-1.76967	0	0.0923512	0.992	5204	tags=93%, list=81%, signal=468%
AMINO ACID DERIVATIVE BIOSYNTHETIC PROCESS_BIO	15	-0.36143	-1.75765	0.0217391	0.0964711	0.993	3070	tags=87%, list=48%, signal=165%
