# Supplementary material for: The p38/HOG stress-activated protein kinase network couples growth to division in Candida albicans
Source: PLoS Genet. 2019 Mar 28;15(3):e1008052. doi: 10.1371/journal.pgen.1008052 (PMC6456229; doi:10.1371/journal.pgen.1008052)
Supplement: S5 Table — (XLSX) [file pgen.1008052.s011.xlsx]

## Sheet: Description
Table S5
Description
Genome-wide occupancy of Hog1 in G1-elutriated cells.
Raw data: Normalized Hog1 occupancies in two biological replicates
Hog1-bound genes: List of genomic regions occupied by Hog1.
ORFs loci: List of ORFs bound by Hog1
Promoter loci: List of gene promoters occupied by Hog1
non-Codin RNA loci: List of snoRNA and tRNA bound by Hog1

## Sheet: Raw data
		Normalized intensities
Probe ID	Orf19 ID	Replicat #1	Replicat #2	Average
Cal219610W	orf19.3603	15.891	10.076	12.9835
CalR20490W	orf19.7312	8.246	7.219	7.7325
CalR06210W	orf19.2833	5.511	10.327	7.919
Cal511770C	orf19.4026	5.178	5.408	5.293
CalR03130C	orf19.2518	5.11	7.0123	6.06115
Cal116010C	orf19.6197	2.179	5.089	3.634
Cal407600W	orf19.3369	3.462	3.281	3.3715
CalR07040C	orf19.2412	1.919	4.567	3.243
Cal603470W	orf19.3430	2.375	3.823	3.099
Cal214240W	orf19.17	2.151	3.914	3.0325
Cal302460C	orf19.2513	2.942	3.763	3.3525
Cal101740W	orf19.6026:orf19.6025	2.94	4.023	3.4815
CalR13850W	snR61	2.594	3.273	2.9335
Cal316050C	orf19.6816	2.385	3.475	2.93
Cal403260C	orf19.4640	3.173	2.622	2.8975
Cal605340W	LSU-C2809	2.386	3.013	2.6995
Cal403420W	orf19.4631	2.504	2.862	2.683
Cal703110C	orf19.6583	2.435	2.906	2.6705
Cal112440C	orf19.413	2.755	2.56	2.6575
Cal127420W	orf19.5277:orf19.5276	2.641	3.98	3.3105
Cal411510W	orf19.740	2.058	3.072	2.565
CalR12110W	orf19.5286	1.212	3.846	2.529
Cal403600W	snR77b	2.141	2.866	2.5035
Cal405970W	snR79	2.098	2.866	2.482
CalR13840C	snR61	2.136	2.762	2.449
Cal124230C	orf19.994	2.43	4.23	3.33
Cal105350W	orf19.2928	2.419	4.12	3.2695
Cal403200W	orf19.4643	2.307	2.978	2.6425
Cal316260C	orf19.6805	1.923	2.67	2.2965
Cal702080W	orf19.7019	1.661	2.928	2.2945
Cal701620W	orf19.7042	2.277	2.829	2.553
Cal602560W	orf19.124	1.872	2.636	2.254
Cal705070W	orf19.6480,orf19.6479	1.468	3.031	2.2495
Cal117110W	orf19.2792	0.842	3.635	2.2385
CalR06190C	orf19.2833	1.041	3.378	2.2095
Cal104390C	orf19.4525	2.191	4.013	3.102
Cal130610C	orf19.4962	1.869	2.486	2.1775
Cal403590C	snR77b	1.847	2.508	2.1775
Cal120330W	snR128	1.955	2.367	2.161
Cal705520W	orf19.6458	3.857	0.377	2.117
Cal112840W	snR39b	2.045	2.151	2.098
Cal708360W	orf19.7201	2.915	1.281	2.098
Cal311640C	orf19.5982	1.765	2.429	2.097
CalR14820W	snR66	1.725	2.463	2.094
CalR05670C	orf19.169	2.089	3.239	2.664
Cal403610C	snR78	1.623	2.493	2.058
Cal405720C	orf19.2747	0.414	3.681	2.0475
Cal502360W	orf19.1964	1.875	2.204	2.0395
Cal310490W	orf19.5919	1.847	2.19	2.0185
Cal112850W	snR39b	1.68	2.348	2.014
Cal109610C	orf19.1063	1.67	2.347	2.0085
CalR13870W	snR55,snR57	1.776	2.232	2.004
CalR20280W	orf19.7303	1.536	2.463	1.9995
Cal105150C	orf19.3690.2	1.606	2.384	1.995
Cal111730W	orf19.446.2	0.208	3.718	1.963
CalR14670C	orf19.693	1.643	2.271	1.957
Cal210650W	orf19.155	1.299	2.607	1.953
CalR05880C	orf19.2822	1.525	2.379	1.952
Cal203890W	orf19.1490.1	1.56	2.338	1.949
Cal214770W	orf19.35	1.924	1.966	1.945
Cal408400W	orf19.1304	1.64	2.229	1.9345
Cal131330W	orf19.5004	1.514	2.349	1.9315
Cal203430C	orf19.1470	1.481	2.374	1.9275
CalR09270C	orf19.493	1.498	2.336	1.917
Cal403550C	snR75	1.542	2.291	1.9165
Cal120320W	snR190	1.488	2.303	1.8955
CalR02890W	orf19.3228	1.739	2.049	1.894
Cal222320W	orf19.1358	1.892	2.982	2.437
Cal505710W	orf19.4274	1.593	2.159	1.876
CalR11160C	orf19.1808	1.591	2.141	1.866
Cal128770W	orf19.3762	1.514	2.196	1.855
Cal114410W	orf19.6272	1.638	2.055	1.8465
Cal302540C	orf19.158	1.632	2.047	1.8395
Cal300200W	orf19.5466	1.445	2.219	1.832
Cal313310C	orf19.7358	1.438	2.226	1.832
Cal701460W	orf19.7047	1.559	2.101	1.83
Cal217940W	orf19.2180	1.395	2.262	1.8285
Cal203720W	orf19.1484	1.536	2.12	1.828
Cal125720C	snR64	1.659	1.989	1.824
Cal305770C	orf19.236	1.364	2.257	1.8105
Cal415980C	orf19.3086	1.719	1.9	1.8095
Cal100390W	orf19.6085	1.643	1.966	1.8045
Cal223090W	orf19.1756	1.413	2.177	1.795
Cal221690W	orf19.1389	1.338	2.215	1.7765
Cal603620C	orf19.3423	1.776	1.982	1.879
Cal202780W	orf19.1993	1.589	1.935	1.762
Cal703300C	orf19.6574	1.361	2.156	1.7585
CalR13880C	snR57b	1.41	2.106	1.758
Cal506740W	orf19.4336	1.337	2.175	1.756
Cal402130W	orf19.4698	1.509	1.994	1.7515
Cal211930C	orf19.3559,CD39	1.438	2.064	1.751
Cal504890C	orf19.4231	1.296	2.205	1.7505
Cal403580W	snR76,snR77	1.416	2.083	1.7495
Cal212590W	orf19.6873,orf19.6873.1	1.132	2.36	1.746
Cal316870W	orf19.6780	1.425	2.066	1.7455
Cal303060W	orf19.1716	0.88	2.573	1.7265
Cal508960W	orf19.1287	0.62	2.832	1.726
Cal310210C	orf19.5904	1.351	2.096	1.7235
Cal208600C	orf19.840	1.294	2.136	1.715
Cal508890W	orf19.3210	2.074	1.353	1.7135
CalR18250W	orf19.6367	1.346	2.071	1.7085
Cal607650W	orf19.5701	1.457	1.958	1.7075
Cal120570W	orf19.4763:orf19.4764	1.704	2.1	1.902
Cal304910W	orf19.1634	1.291	2.117	1.704
Cal212160W	orf19.3572	1.3	2.107	1.7035
Cal402150W	orf19.4697	1.402	1.999	1.7005
Cal501140C	orf19.936	1.487	1.902	1.6945
Cal125440W	orf19.2310.1	1.31	2.069	1.6895
Cal703330C	orf19.6573	1.338	2.033	1.6855
Cal413360W	orf19.4405	1.219	2.134	1.6765
Cal605350W	orf19.3482	1.357	1.992	1.6745
Cal204750C	orf19.1535	1.395	1.938	1.6665
Cal123900C	orf19.4909.1	1.317	2.004	1.6605
Cal305760W	orf19.234	1.106	2.212	1.659
Cal501490W	orf19.921	1.236	2.081	1.6585
Cal101470W	orf19.6036	1.279	2.028	1.6535
Cal403560C	snR76	1.42	1.877	1.6485
Cal503470C	orf19.4152	1.419	1.868	1.6435
Cal304380W	orf19.1659	1.272	2.013	1.6425
Cal208620C	orf19.838.1	1.3	1.963	1.6315
Cal105570W	orf19.2939	1.248	2.012	1.63
Cal109430C	orf19.1054	1.371	1.864	1.6175
CalR17200C	orf19.6286.2	1.164	2.069	1.6165
Cal115400W	orf19.6227	1.614	2.139	1.8765
Cal100400C	orf19.6084	1.229	1.998	1.6135
Cal204510W	snR48	1.295	1.926	1.6105
Cal123740W	orf19.4903	1.272	1.948	1.61
Cal128620W	orf19.68.2	1.326	1.888	1.607
Cal105070C	orf19.3686	1.259	1.953	1.606
Cal109340C	orf19.1050	1.286	1.921	1.6035
Cal403380C	orf19.4632	1.162	2.044	1.603
Cal503820W	orf19.3202	1.294	1.908	1.601
Cal403120W	orf19.4647	1.128	2.073	1.6005
Cal702990W	orf19.6588,orf19.6587	1.486	1.707	1.5965
Cal501590W	orf19.570	1.312	1.876	1.594
Cal114570C	orf19.6265.1	1.159	2.023	1.591
Cal403250W	orf19.4641	1.248	1.929	1.5885
Cal222840W	orf19.1767	1.308	1.866	1.587
Cal303420W	orf19.1700	1.19	1.984	1.587
Cal106750C	orf19.2994	1.276	1.885	1.5805
Cal602520W	orf19.123	0.964	2.193	1.5785
Cal411040C	orf19.3789	1.31	1.836	1.573
Cal401680C	orf19.4163	1.11	2.035	1.5725
Cal609040C	orf19.1215	1.267	1.877	1.572
Cal129780W	snR70	1.193	1.947	1.57
Cal508950W	orf19.1287	1.121	2.016	1.5685
CalR13940C	orf19.3876	1.172	1.959	1.5655
Cal305940W	orf19.242.2	1.14	1.984	1.562
Cal203440W	orf19.1470	1.268	1.853	1.5605
Cal405950W	orf19.2735	1.272	1.84	1.556
Cal114880W	orf19.6253	1.46	1.648	1.554
Cal311630W	orf19.5980	1.277	1.82	1.5485
Cal315240C	orf19.7443	1.064	2.018	1.541
Cal212580C	orf19.6873	1.178	1.902	1.54
Cal106770W	orf19.2994.1	1.444	1.634	1.539
Cal105300C	orf19.2927	1.232	1.844	1.538
Cal211130W	tG(GCC)3,tG(GCC)5,tG(GCC)4,tG(GCC)2,tG(GCC)1,tG(GCC)6	1.8	1.269	1.5345
Cal210370C	orf19.4490	1.175	1.893	1.534
Cal303010W	orf19.1718	1.135	1.933	1.534
Cal115580W	orf19.6222	1.138	1.925	1.5315
Cal609370W	orf19.1075	1.075	1.983	1.529
Cal503410C	orf19.4149	1.068	1.988	1.528
Cal703840C	orf19.6541	1.196	1.86	1.528
Cal505440W	orf19.4261	1.185	1.87	1.5275
Cal403570C	snR77,snR76	1.218	1.834	1.526
Cal403510C	snR73	1.254	1.797	1.5255
Cal125470C	orf19.2309.2	1.049	1.994	1.5215
CalR02990W	orf19.3223	1.192	1.847	1.5195
Cal602000W	orf19.94	1.111	1.926	1.5185
Cal701760W	orf19.7034	2.458	0.575	1.5165
Cal218980C	orf19.3631	1.231	1.8	1.5155
Cal505740W	orf19.4275	1.317	1.712	1.5145
Cal206930W	orf19.5788	1.039	1.972	1.5055
CalR22590C	orf19.7588	1.231	1.772	1.5015
Cal503130W	orf19.1926	1.093	1.909	1.501
CalR08520C	orf19.4375.1	1.133	1.867	1.5
Cal212180W	orf19.3572.3	1.08	1.911	1.4955
Cal305780W	orf19.236	1.129	1.861	1.495
Cal105140W	orf19.3689	1.222	1.767	1.4945
Cal310630W	orf19.5926	1.306	1.668	1.487
Cal603570W	orf19.3426	1.186	1.788	1.487
CalR21550W	orf19.6597	0.799	2.172	1.4855
CalR06050W	orf19.2827	1.103	1.865	1.484
Cal414380C	orf19.2888	1.016	1.951	1.4835
Cal222770W	orf19.1769	1.154	1.808	1.481
Cal604570C	orf19.3504	1.104	1.855	1.4795
Cal126150W	orf19.667.1	1.058	1.9	1.479
Cal217950C	orf19.2179.2	1.117	1.832	1.4745
Cal508620C	orf19.1105	1.074	1.875	1.4745
Cal702670W	orf19.6906	0.931	2.007	1.469
CalR04020W	orf19.2574,orf19.2575	1.1	1.837	1.4685
Cal312550W	orf19.6983	1.114	1.816	1.465
Cal313230W	orf19.7354	1.042	1.884	1.463
CalR02840W	orf19.3230	1.266	1.66	1.463
Cal210500W	orf19.145	1.318	1.605	1.4615
Cal200450C	orf19.2111	1.083	1.839	1.461
Cal129790W	snR70	1.092	1.826	1.459
Cal405960C	snR79	1.025	1.893	1.459
Cal305750W	orf19.234	0.963	1.954	1.4585
Cal215050W	orf19.3151	1.176	1.737	1.4565
Cal407410W	orf19.1439	1.042	1.865	1.4535
Cal128420C	orf19.5225.2	1.167	1.737	1.452
Cal311990C	orf19.6002	1.136	1.767	1.4515
Cal305520W	orf19.1609	1.064	1.838	1.451
Cal408660W	orf19.5041	0.945	1.957	1.451
CalR14800W	snR66	1.104	1.795	1.4495
Cal212190C	snR63	0.992	1.906	1.449
Cal702660W	orf19.6906,snR24	0.911	1.979	1.445
Cal214260C	snR54	1.129	1.759	1.444
Cal312670W	orf19.6986	1.141	1.742	1.4415
Cal411770W	orf19.6861	1.063	1.82	1.4415
Cal303140C	orf19.1712	1.117	1.762	1.4395
CalR05010W	orf19.3746	1.084	1.795	1.4395
CalR01140W	snR35a	1.17	1.707	1.4385
Cal120310W	snR190	1.17	1.704	1.437
Cal102890C	orf19.3324	1.11	1.762	1.436
Cal208820W	orf19.832	1.051	1.82	1.4355
Cal403390W	orf19.4632	1.081	1.789	1.435
CalR02330W	orf19.3255	1.062	1.801	1.4315
Cal106920W	orf19.3002	1.121	1.741	1.431
Cal503320W	orf19.4145	1.04	1.822	1.431
Cal603790W	orf19.3415.1	0.91	1.95	1.43
CalR03040W	orf19.3222	1.087	1.773	1.43
Cal507780C	orf19.6663	0.98	1.876	1.428
CalR21410W	orf19.6602	1.171	1.684	1.4275
Cal707870W	orf19.6689	1.368	1.486	1.427
Cal609050W	orf19.1215,orf19.1214	1.036	1.815	1.4255
Cal503460W	orf19.4151	1.281	1.569	1.425
Cal301200W	orf19.5407	1.017	1.826	1.4215
Cal120340W	snR128	1.201	1.64	1.4205
Cal402960W	orf19.4656	0.994	1.847	1.4205
Cal300210C	orf19.5465	1.129	1.71	1.4195
Cal708500C	orf19.7194	1.042	1.796	1.419
Cal405730W	orf19.2747	0.945	1.89	1.4175
Cal510250C	orf19.3942.1	1.046	1.787	1.4165
Cal409890W	orf19.1409.1	0.915	1.913	1.414
Cal310670C	orf19.5929	0.966	1.86	1.413
Cal108100W	orf19.3061.1:orf19.3062	1.111	1.705	1.408
Cal602460C	orf19.121	2.682	0.134	1.408
CalR04960W	orf19.3749	1.08	1.734	1.407
Cal112860W	orf19.2478.1	1.118	1.689	1.4035
Cal301740C	orf19.5376	1.403	1.76	1.5815
Cal509610W	orf19.3914	1.128	1.676	1.402
Cal705790C	orf19.3699	1.195	1.603	1.399
CalR15530W	orf19.178	1.289	1.507	1.398
Cal131870W	orf19.5026	1.311	1.476	1.3935
Cal129800W	orf19.4929	1.131	1.645	1.388
Cal503420W	orf19.4149	1.014	1.762	1.388
Cal215290C	orf19.2232	1.052	1.717	1.3845
Cal204740W	orf19.1534	0.988	1.78	1.384
Cal210700W	orf19.194	1.026	1.742	1.384
Cal132310C	orf19.7217	0.832	1.933	1.3825
Cal210480C	orf19.145	1.022	1.741	1.3815
Cal221430W	snR68	1.192	1.569	1.3805
Cal208940C	orf19.827	0.996	1.763	1.3795
Cal305550W	orf19.1608	0.116	2.641	1.3785
Cal306400W	tR(UCU)1	1.061	1.695	1.378
Cal222830C	orf19.1767	1.531	1.219	1.375
Cal117920W	orf19.5063	0.937	1.812	1.3745
Cal106980W	orf19.3003.1	0.927	1.819	1.373
Cal214230C	orf19.17	1.114	1.631	1.3725
Cal403230C	orf19.4642	0.987	1.758	1.3725
Cal303020W	orf19.1717	1.15	1.594	1.372
Cal316720C	orf19.6785	0.952	1.785	1.3685
Cal316830C	orf19.6781	1.032	1.701	1.3665
Cal409150W	orf19.5303	1.476	1.251	1.3635
Cal212200W	snR63	0.963	1.747	1.355
CalR14810W	snR66	1.044	1.666	1.355
Cal122150C	orf19.4833	0.72	1.987	1.3535
Cal108090C	orf19.3061.1	1.019	1.683	1.351
Cal106780W	orf19.2995	0.961	1.739	1.35
Cal403520W	snR73	1.096	1.6	1.348
Cal602050C	orf19.96	1.101	1.585	1.343
Cal223850C	orf19.5342	1.056	1.626	1.341
Cal508630W	orf19.1105	0.875	1.804	1.3395
Cal218450W	orf19.2219,orf19.2127	1.12	1.555	1.3375
Cal217400C	orf19.2204	1.337	1.22	1.2785
Cal120520C	orf19.4760	0.921	1.752	1.3365
CalR18780W	orf19.6403	1.029	1.638	1.3335
Cal218650W	orf19.1350	0.888	1.774	1.331
Cal211940W	CD39	1.011	1.643	1.327
Cal313460W	snR44d	0.934	1.712	1.323
Cal605320W	snR58	1.045	1.599	1.322
Cal116680C	orf19.4436,orf19.4435	0.976	1.665	1.3205
Cal303430C	orf19.1699	0.918	1.723	1.3205
Cal219580W	orf19.3605	1.118	1.522	1.32
CalR02920W	orf19.3227	0.947	1.688	1.3175
Cal405490W	orf19.2756	0.946	1.687	1.3165
Cal701390W	orf19.7050	0.941	1.692	1.3165
CalR22000W	orf19.7556	0.979	1.653	1.316
Cal503490W	orf19.4152	0.992	1.64	1.316
Cal220740W	tP(UGG)2	1.154	1.475	1.3145
CalR05190W	snR71	0.986	1.638	1.312
Cal503630C	orf19.6294	1.037	1.583	1.31
Cal219630W	orf19.3603	0.924	1.694	1.309
Cal105480W	orf19.2935	0.979	1.638	1.3085
CalR13860C	snR55,snR57	0.999	1.617	1.308
Cal221200W	orf19.1601	0.827	1.786	1.3065
CalR02440C	orf19.3250	0.857	1.755	1.306
Cal304450W	orf19.1656	0.545	2.061	1.303
Cal204140C	orf19.1505	0.857	1.737	1.297
Cal129890W	orf19.4931.1	0.803	1.791	1.297
Cal212810C	orf19.6882.1	0.82	1.774	1.297
Cal702930C	orf19.6920	0.89	1.701	1.2955
Cal312310C	orf19.6975	0.763	1.817	1.29
CalR02690W	orf19.3235	0.934	1.645	1.2895
Cal311340W	orf19.5964.2	1.019	1.558	1.2885
Cal601640W	orf19.3643	1.107	1.466	1.2865
Cal511050W	orf19.3984	0.985	1.578	1.2815
Cal601320C	orf19.4193.1	0.728	1.832	1.28
Cal408450W	orf19.1301	1.067	1.487	1.277
Cal702210C	orf19.7014:orf19.7013	0.949	1.603	1.276
Cal609250W	orf19.4553	1.253	1.291	1.272
Cal109680W	orf19.1065	0.817	1.722	1.2695
Cal208280W	orf19.852	0.689	1.848	1.2685
Cal602960W	orf19.3447	0.868	1.666	1.267
Cal222340W	orf19.1358	0.806	1.722	1.264
CalR14700W	orf19.695	1.542	0.986	1.264
Cal501350W	orf19.929	0.874	1.653	1.2635
Cal124470W	snR62	0.827	1.695	1.261
Cal218360W	orf19.2166	0.832	1.69	1.261
Cal312340C	orf19.6976	1.391	1.122	1.2565
Cal503170C	orf19.4133	0.895	1.618	1.2565
Cal303670C	orf19.1684	-0.355	2.866	1.2555
Cal219520C	orf19.3607	0.866	1.644	1.255
Cal507770W	orf19.6662	0.893	1.615	1.254
CalR06840C	orf19.2864.1	0.785	1.723	1.254
Cal403480W	orf19.4629	0.931	1.575	1.253
Cal401660C	orf19.4164	0.932	1.57	1.251
Cal302690W	orf19.3159	0.897	1.605	1.251
Cal313280W	orf19.7356,orf19.7357	0.802	1.699	1.2505
Cal407790W	orf19.3376	0.987	1.514	1.2505
Cal219000W	orf19.3630	0.954	1.546	1.25
Cal403470W	orf19.4629	1.017	1.481	1.249
Cal414330W	orf19.2891	1.248	1.543	1.3955
Cal505660C	orf19.4273	0.901	1.586	1.2435
Cal214830W	orf19.36	0.69	1.796	1.243
Cal109150C	orf19.1039	0.99	1.494	1.242
Cal502540W	orf19.1956	0.961	1.522	1.2415
Cal701470C	orf19.7047	0.886	1.596	1.241
Cal305650W	orf19.229	0.937	1.543	1.24
CalR14470C	orf19.716	0.859	1.619	1.239
Cal502550C	snR189c	0.891	1.585	1.238
Cal214910W	orf19.81	1.031	1.442	1.2365
Cal129350W	orf19.6340	0.942	1.53	1.236
CalR10780W	orf19.6312	0.808	1.657	1.2325
Cal512080C	orf19.4051	0.912	1.55	1.231
Cal702100W	orf19.7018	0.759	1.703	1.231
Cal103550W	orf19.3354,orf19.5341	0.799	1.662	1.2305
Cal304420W	orf19.1658	0.887	1.565	1.226
Cal112830W	snR39b	0.958	1.488	1.223
Cal209150W	orf19.814	0.891	1.553	1.222
Cal402860W	orf19.4660	0.895	1.549	1.222
Cal116740W	orf19.4432	1.009	1.434	1.2215
Cal219510W	orf19.3608	0.851	1.591	1.221
CalR19070W	orf19.6415.1,orf19.6417	0.911	1.524	1.2175
Cal406840W	orf19.2684	0.748	1.686	1.217
Cal304900W	orf19.1635	0.93	1.503	1.2165
Cal510870C	orf19.3976	0.857	1.567	1.212
Cal415970W	orf19.3087	0.681	1.742	1.2115
CalR01980C	orf19.3268	0.88	1.529	1.2045
Cal601680C	orf19.3642	0.836	1.571	1.2035
CalR01430W	orf19.7475	0.893	1.514	1.2035
Cal103190C	orf19.3334	0.616	1.789	1.2025
Cal208430W	orf19.848	0.933	1.468	1.2005
Cal223440W	orf19.1742	0.872	1.529	1.2005
Cal212080C	orf19.3568	0.882	1.503	1.1925
Cal702730W	orf19.6909	0.931	1.451	1.191
Cal703750C	orf19.6551	0.828	1.549	1.1885
Cal115880W	orf19.6203	0.896	1.48	1.188
Cal101670C	orf19.6028	0.845	1.53	1.1875
Cal209550W	orf19.794	0.867	1.502	1.1845
Cal508930W	orf19.3209	0.813	1.556	1.1845
Cal608060W	orf19.5728	0.945	1.423	1.184
Cal125060W	orf19.2329.1	0.899	1.467	1.183
Cal404500W	orf19.4589	0.889	1.477	1.183
Cal505420C	orf19.4261	0.898	1.468	1.183
CalR18360W	orf19.6376	0.772	1.594	1.183
Cal202570W	orf19.2002	0.819	1.546	1.1825
Cal312030W	orf19.6003	1.044	1.32	1.182
Cal510240W	orf19.3942	0.894	1.469	1.1815
CalR05200C	orf19.3736	0.655	1.708	1.1815
CalR12570W	tC(GCA)1	0.772	1.588	1.18
CalR15770W	orf19.2360	0.85	1.508	1.179
Cal120210W	orf19.4751	0.849	1.507	1.178
Cal204700C	orf19.1533	0.772	1.582	1.177
Cal128040W	orf19.5242	0.778	1.572	1.175
Cal608430C	orf19.5751	0.847	1.501	1.174
Cal709180C	orf19.7150	0.849	1.496	1.1725
Cal105470C	orf19.2934:orf19.2935	0.839	1.501	1.17
Cal313590W	orf19.7367	0.848	1.492	1.17
Cal603370C	orf19.3432.1	0.897	1.443	1.17
Cal202320W	orf19.2014,orf19.2013	0.738	1.6	1.169
Cal113720W	orf19.2435	0.856	1.481	1.1685
Cal100130W	orf19.6112,orf19.2661,orf19.7276.1,orf19.362,orf19.3074,orf19.4054,orf19.7127.1,orf19.7544,orf19.2662,orf19.1923,tL(CAA)5	0.747	1.584	1.1655
Cal129210W	orf19.6346	0.85	1.476	1.163
Cal215380W	orf19.2237.1	0.841	1.485	1.163
Cal109080W	orf19.4479	0.867	1.455	1.161
Cal101770W	orf19.6024	1.44	0.881	1.1605
Cal708370C	orf19.7200	0.846	1.471	1.1585
CalR05820W	orf19.2819	0.725	1.586	1.1555
Cal127100W	orf19.1140	1.227	1.08	1.1535
Cal410140W	snR18	0.618	1.688	1.153
Cal506340W	orf19.4311	0.835	1.468	1.1515
Cal205530C	orf19.1577	0.878	1.424	1.151
Cal116020W	orf19.6197	0.797	1.502	1.1495
Cal509190C	orf19.3895	0.915	1.381	1.148
Cal606920C	orf19.5595	0.807	1.483	1.145
CalR14510C	orf19.714	1.134	1.153	1.1435
Cal208960C	orf19.826	0.669	1.616	1.1425
Cal115940W	orf19.6200	1.186	1.095	1.1405
Cal105090W	orf19.3687	0.839	1.437	1.138
Cal222920W	orf19.1764	0.847	1.427	1.137
Cal703630W	orf19.6555	0.504	1.77	1.137
Cal409240W	orf19.5299,orf19.5299.1	0.744	1.525	1.1345
Cal707150W	orf19.5126	0.766	1.503	1.1345
CalR22570C	orf19.7586	0.741	1.528	1.1345
Cal125410W	orf19.2311	0.711	1.555	1.133
Cal607720W	orf19.5711	0.646	1.617	1.1315
Cal501010W	orf19.942	0.846	1.415	1.1305
CalR18790C	orf19.6403.1	0.771	1.488	1.1295
Cal304300W	tV(AAC)2,orf19.1662	0.887	1.371	1.129
CalR22010C	orf19.7557	0.837	1.42	1.1285
Cal407640W	orf19.3370	0.929	1.327	1.128
CalR19060C	orf19.6415.1	0.848	1.408	1.128
CalR11440W	tH(GUG)1	0.77	1.484	1.127
Cal508660C	orf19.3219	0.999	1.25	1.1245
Cal511130W	orf19.3990	0.951	1.298	1.1245
Cal311790C	orf19.5992	0.778	1.47	1.124
Cal117710C	orf19.5049	0.461	1.786	1.1235
Cal120450W	orf19.4757	0.822	1.424	1.123
Cal222710C	orf19.1772	0.749	1.497	1.123
Cal106990W	orf19.3004	0.792	1.452	1.122
Cal412030C	orf19.1791	0.855	1.388	1.1215
CalR11070W	orf19.1803	0.864	1.373	1.1185
Cal403540W	snR74	0.832	1.404	1.118
Cal708440W	orf19.7197	0.833	1.403	1.118
Cal128960C	orf19.6358	0.765	1.47	1.1175
Cal131480C	orf19.5010	0.884	1.351	1.1175
Cal511340W	orf19.4001	0.784	1.448	1.116
Cal216440W	orf19.1902	1.022	1.207	1.1145
Cal415030W	orf19.3138	0.762	1.466	1.114
Cal207520W	orf19.895:orf19.894	0.661	1.566	1.1135
Cal220490W	orf19.4066	0.657	1.57	1.1135
Cal305250W	orf19.1620	0.745	1.482	1.1135
Cal702650W	snR24	0.658	1.567	1.1125
Cal708320W	orf19.7203	0.739	1.486	1.1125
Cal103700W	orf19.3360	0.929	1.293	1.111
CalR02800C	orf19.3231	0.762	1.459	1.1105
Cal120190C	orf19.4750	0.712	1.506	1.109
Cal409270C	orf19.5297	0.753	1.464	1.1085
CalR11990W	orf19.5288.1	0.758	1.458	1.108
Cal707820W	orf19.6688	0.868	1.347	1.1075
Cal205990W	orf19.5832	0.763	1.447	1.105
Cal122930C	orf19.4870	0.792	1.417	1.1045
Cal205240C	orf19.1562	0.774	1.433	1.1035
Cal408740W	orf19.5046	0.751	1.456	1.1035
Cal125070C	orf19.2330	0.745	1.459	1.102
Cal605230W	orf19.3476	0.694	1.509	1.1015
Cal219100C	orf19.3626.1	0.639	1.553	1.096
Cal403030W	orf19.4651	0.761	1.43	1.0955
Cal209570W	orf19.793	0.764	1.425	1.0945
Cal602920C	orf19.3448	0.753	1.436	1.0945
Cal510650W	orf19.3963	0.761	1.421	1.091
Cal707640C	orf19.6705	0.901	1.281	1.091
Cal403060W	orf19.4650	0.761	1.418	1.0895
Cal701370W	orf19.7051	0.852	1.324	1.088
Cal219360W	orf19.3615	0.737	1.435	1.086
Cal130330W	orf19.4952	0.87	1.299	1.0845
Cal404120W	orf19.4606:orf19.4605	0.596	1.569	1.0825
CalR09190W	orf19.489:orf19.490	0.754	1.406	1.08
Cal504000W	orf19.3192	0.8	1.358	1.079
Cal303980C	orf19.1672	0.83	1.328	1.079
Cal412120W	orf19.1795	0.529	1.629	1.079
Cal707140C	orf19.5126	0.689	1.469	1.079
CalR23260W	snR13	0.803	1.355	1.079
CalR12560C	tC(GCA)1	0.665	1.49	1.0775
Cal602600C	orf19.130	0.827	1.327	1.077
Cal701680W	orf19.7038	0.997	1.157	1.077
CalR04160C	orf19.2583,orf19.2583.1	0.919	1.235	1.077
Cal312200C	orf19.6968	1.205	0.948	1.0765
Cal403780C	orf19.4623,orf19.4622	0.924	1.227	1.0755
CalR14870W	orf19.699	0.861	1.29	1.0755
Cal510750W	orf19.3969	0.881	1.269	1.075
Cal124410W	orf19.1005	0.886	1.26	1.073
Cal705530C	orf19.6458	0.774	1.372	1.073
Cal117310C	orf19.2784	0.617	1.526	1.0715
Cal126820C	orf19.1152	0.968	1.174	1.071
Cal213590W	orf19.4116	0.739	1.398	1.0685
Cal102760C	orf19.3317	0.789	1.346	1.0675
Cal707480W	orf19.1334	0.858	1.272	1.065
Cal129870C	snR87	0.77	1.359	1.0645
Cal123020W	orf19.4873	0.759	1.364	1.0615
Cal305620C	orf19.227	0.653	1.469	1.061
Cal500940C	orf19.944	0.518	1.601	1.0595
Cal313650W	orf19.7369	0.742	1.372	1.057
Cal208230W	tE(CUC)1	0.722	1.388	1.055
Cal111700W	orf19.448	0.774	1.334	1.054
Cal402830W	orf19.4662	0.653	1.455	1.054
Cal408810W	orf19.1595	0.808	1.3	1.054
Cal411050W	orf19.3789:orf19.3788.1	0.654	1.454	1.054
CalR09450W	orf19.506	0.742	1.366	1.054
Cal303720W	orf19.1682	0.714	1.393	1.0535
Cal223300C	orf19.1746	0.768	1.337	1.0525
Cal309700W	orf19.5869	0.744	1.36	1.052
Cal401970W	tG(GCC)5	0.527	1.577	1.052
Cal702110C	orf19.7017	0.633	1.47	1.0515
Cal108950W	orf19.4474	0.808	1.289	1.0485
Cal600730C	orf19.1199	0.644	1.451	1.0475
CalR03970W	orf19.2571	0.778	1.317	1.0475
Cal604330C	orf19.687.1	0.516	1.578	1.047
CalR07810W	orf19.4392	0.66	1.433	1.0465
CalR21170C	orf19.7343	0.74	1.353	1.0465
Cal105990W	orf19.2958	0.644	1.448	1.046
Cal130250C	orf19.4950	0.78	1.312	1.046
Cal202540W	orf19.2003	0.759	1.331	1.045
Cal403460C	orf19.4629	0.693	1.393	1.043
CalR15960W	orf19.8	0.694	1.391	1.0425
Cal224160W	snR47	0.719	1.364	1.0415
Cal202450W	orf19.2006.1	0.768	1.314	1.041
Cal703230C	orf19.6578	1.274	0.808	1.041
CalR21230C	orf19.6612	0.806	1.274	1.04
Cal204710W	orf19.1533	0.842	1.237	1.0395
Cal223780W	orf19.5338	0.681	1.389	1.035
CalR17890C	orf19.610	0.706	1.362	1.034
Cal701640W	orf19.7041	0.708	1.358	1.033
Cal410800C	orf19.3801	1.054	1.008	1.031
Cal314010W	orf19.7384	0.645	1.411	1.028
Cal119060W	orf19.382,orf19.1435	0.514	1.54	1.027
CalR05910W	orf19.2823	0.498	1.556	1.027
Cal310640C	orf19.5927	0.503	1.551	1.027
Cal115590C	orf19.6220.4	0.521	1.532	1.0265
Cal405270W	orf19.2767	0.737	1.314	1.0255
CalR04410W	orf19.2601	0.593	1.457	1.025
Cal403330W	orf19.4635	0.932	1.117	1.0245
Cal505180C	orf19.4245	0.811	1.237	1.024
Cal602930W	orf19.3448	0.557	1.491	1.024
Cal128990W	orf19.6357	0.699	1.348	1.0235
Cal402060W	orf19.4701	0.698	1.349	1.0235
Cal204500W	snR48	0.72	1.326	1.023
Cal205510W	orf19.1576	0.655	1.39	1.0225
Cal125450C	orf19.2310	0.743	1.3	1.0215
Cal708430C	orf19.7197	0.831	1.211	1.021
Cal402240W	orf19.4689	0.706	1.334	1.02
Cal403500W	snR72	0.621	1.419	1.02
Cal506380W	orf19.4315,orf19.4316	0.647	1.393	1.02
Cal510910W	orf19.3978	0.62	1.419	1.0195
Cal602310C	orf19.113	0.481	1.555	1.018
Cal119930C	orf19.4736	0.24	1.794	1.017
Cal129860W	orf19.4931	0.703	1.33	1.0165
CalR09920W	orf19.532	0.718	1.313	1.0155
CalR12280W	orf19.3517	0.603	1.428	1.0155
Cal212220W	tI(AAU)3:orf19.3573	0.682	1.347	1.0145
Cal704800C	orf19.6492	0.631	1.397	1.014
Cal101940C	orf19.6017	0.679	1.348	1.0135
Cal208410W	orf19.848	0.373	1.654	1.0135
Cal601820C	orf19.88	0.737	1.29	1.0135
Cal214270W	snR54	0.639	1.387	1.013
Cal411090C	orf19.3788	0.656	1.368	1.012
Cal316710W	orf19.6786	0.683	1.339	1.011
Cal703600C	orf19.6556	0.651	1.37	1.0105
Cal129900C	orf19.4932	0.705	1.315	1.01
Cal219670W	orf19.3600	0.747	1.273	1.01
Cal132000W	orf19.5032	0.575	1.444	1.0095
Cal309470W	orf19.5859	0.652	1.366	1.009
Cal105450C	orf19.2934	0.649	1.369	1.009
Cal109580W	orf19.1061,orf19.1853	0.53	1.485	1.0075
CalR14460W	orf19.717	0.748	1.264	1.006
Cal108640W	orf19.4457	0.567	1.444	1.0055
Cal215370W	orf19.2237.1	0.659	1.352	1.0055
CalR19090W	orf19.6417	0.615	1.392	1.0035
Cal204950W	orf19.1543	0.535	1.47	1.0025
Cal508800W	orf19.3214	0.707	1.296	1.0015
Cal113750C	orf19.2433	0.676	1.326	1.001
Cal126510C	orf19.1168	0.712	1.29	1.001
Cal603630W	orf19.3423	0.774	1.227	1.0005
Cal309670W	orf19.5867	0.739	1.26	0.9995
Cal114020W	orf19.1827	0.811	1.181	0.996
Cal600430W	orf19.1180	0.495	1.497	0.996
CalR13750W	orf19.3869	0.715	1.277	0.996
CalR06830W	orf19.2426	0.399	1.592	0.9955
Cal204170C	orf19.1507	0.731	1.258	0.9945
Cal204520W	orf19.1525	0.76	1.228	0.994
CalR05660W	orf19.171	0.628	1.359	0.9935
CalR05970W	orf19.2825	0.66	1.326	0.993
Cal116150C	orf19.4455	0.619	1.367	0.993
Cal705800W	orf19.3699	0.865	1.119	0.992
Cal304190W	orf19.1666	0.613	1.363	0.988
Cal108830W	orf19.4467	0.75	1.223	0.9865
Cal408540C	orf19.1297	0.637	1.335	0.986
Cal102080C	orf19.6010	0.562	1.406	0.984
Cal304950W	orf19.1633	0.671	1.297	0.984
Cal116750W	orf19.4432	0.706	1.26	0.983
Cal509550C	orf19.3911	0.617	1.349	0.983
Cal221470W	orf19.1400	0.652	1.312	0.982
Cal403340C	orf19.4634	0.622	1.34	0.981
Cal223180W	orf19.1753	0.748	1.214	0.981
Cal508970W	orf19.1287	0.605	1.356	0.9805
CalR04150W	orf19.2583,orf19.2583.1	0.732	1.227	0.9795
Cal708130C	orf19.5507	0.532	1.426	0.979
Cal132440W	orf19.7222:orf19.7223	0.647	1.31	0.9785
CalR14740W	snR5d	0.791	1.165	0.978
Cal113800C	orf19.2432	0.656	1.298	0.977
Cal129220W	orf19.6345	0.624	1.327	0.9755
Cal130700W	orf19.4966	0.755	1.196	0.9755
Cal219210C	orf19.3622	0.487	1.463	0.975
Cal105900W	orf19.2954	0.613	1.334	0.9735
Cal129070C	orf19.6351	0.669	1.277	0.973
Cal214290W	orf19.18:snR50	0.643	1.301	0.972
Cal105230C	orf19.3694	0.742	1.2	0.971
Cal305460W	orf19.1613	0.779	1.162	0.9705
Cal209890W	orf19.4513	0.614	1.326	0.97
Cal609710W	orf19.1089	0.753	1.185	0.969
Cal402270W	orf19.4688	0.622	1.312	0.967
Cal511400W	orf19.4004	0.588	1.344	0.966
CalR17730C	orf19.3713	0.616	1.314	0.965
Cal128720W	orf19.3765	0.589	1.341	0.965
Cal109320C	orf19.1049	0.709	1.22	0.9645
CalR01130W	snR35a	0.711	1.217	0.964
Cal701660W	orf19.7041	0.672	1.255	0.9635
Cal309100W	orf19.2809	0.716	1.209	0.9625
Cal306060W	orf19.250	0.734	1.189	0.9615
Cal314150C	orf19.7392	0.654	1.269	0.9615
CalR17630C	orf19.3708	0.623	1.298	0.9605
Cal208930W	orf19.827.1	0.389	1.531	0.96
Cal311900C	orf19.5999	0.552	1.367	0.9595
Cal700070W	orf19.7121	0.632	1.286	0.959
Cal512070W	orf19.4048	0.491	1.425	0.958
Cal132960C	orf19.7257	0.419	1.495	0.957
Cal117580C	orf19.1233	0.72	1.193	0.9565
Cal303000C	orf19.1718	0.725	1.188	0.9565
CalR13680W	orf19.3865	0.791	1.118	0.9545
Cal316170C	orf19.6810	0.523	1.384	0.9535
Cal113710C	orf19.2435	0.597	1.309	0.953
Cal701810W	orf19.7032	0.581	1.323	0.952
Cal101650W	orf19.6029	0.689	1.214	0.9515
Cal107120C	orf19.3010.1	0.482	1.421	0.9515
Cal130750W	orf19.4969	0.66	1.243	0.9515
Cal208590W	orf19.841	0.612	1.291	0.9515
Cal701980C	orf19.7022	0.854	1.048	0.951
Cal604980C	orf19.3465	0.416	1.486	0.951
Cal129750W	snR41b	0.591	1.309	0.95
Cal202550W	orf19.2002	0.711	1.189	0.95
Cal114640W	orf19.6264.3	0.666	1.232	0.949
Cal705880W	orf19.3695	0.842	1.056	0.949
CalR05690W	orf19.169	0.602	1.294	0.948
Cal408510C	orf19.1298	0.199	1.695	0.947
Cal409320W	orf19.5295	0.658	1.236	0.947
Cal407250W	orf19.2665	0.703	1.188	0.9455
Cal131140W	orf19.4995	0.607	1.283	0.945
Cal114240W	orf19.177	0.741	1.147	0.944
Cal305420C	orf19.1614	0.486	1.401	0.9435
Cal510210W	orf19.3941	0.676	1.209	0.9425
CalR14430W	orf19.718	0.663	1.22	0.9415
CalR18350W	orf19.6375	0.628	1.255	0.9415
Cal106700W	orf19.2991	0.435	1.447	0.941
Cal509450W	orf19.3906	0.614	1.268	0.941
Cal120350C	orf19.4754	0.601	1.278	0.9395
Cal214520W	tI(AAU)1	0.576	1.303	0.9395
Cal511690C	orf19.4022	0.576	1.302	0.939
Cal106330W	orf19.2971	0.572	1.303	0.9375
Cal506500C	orf19.4323	0.574	1.301	0.9375
CalR22060C	orf19.7561	0.506	1.368	0.937
Cal222760W	orf19.1770	0.655	1.217	0.936
Cal302370C	orf19.2510	0.572	1.3	0.936
Cal506520W	orf19.4324	0.598	1.274	0.936
Cal219300W	orf19.3617	0.4	1.471	0.9355
CalR06500C	orf19.2847	0.668	1.202	0.935
Cal207140W	orf19.5776	0.472	1.398	0.935
Cal107670W	tN(GUU)3	0.457	1.412	0.9345
Cal114780W	orf19.6257	0.651	1.218	0.9345
Cal412280W	orf19.1801	0.483	1.386	0.9345
Cal609490W	orf19.1080	0.601	1.266	0.9335
Cal305670C	orf19.230	0.553	1.313	0.933
Cal602390W	orf19.117	0.495	1.371	0.933
Cal316550C	orf19.6792	0.688	1.178	0.933
Cal126500W	orf19.1169	0.411	1.454	0.9325
Cal608350C	orf19.5747	0.671	1.193	0.932
Cal214250C	orf19.18	0.457	1.406	0.9315
Cal306090W	orf19.251	0.646	1.213	0.9295
Cal202910C	orf19.1441	0.682	1.175	0.9285
Cal208320W	orf19.851	0.501	1.356	0.9285
CalR15730C	orf19.2362	0.513	1.344	0.9285
Cal415950C	orf19.3087.1	0.626	1.23	0.928
Cal502030W	orf19.1978	0.637	1.215	0.926
Cal105380W	orf19.2929	0.632	1.219	0.9255
Cal605560W	orf19.5518	0.614	1.236	0.925
Cal304500W	tY(GUA)2	0.598	1.248	0.923
Cal107520W	orf19.3037	0.614	1.231	0.9225
Cal305470C	orf19.1611	0.522	1.323	0.9225
Cal311400W	orf19.5968	0.918	0.925	0.9215
Cal706510C	orf19.5159:orf19.5158	0.529	1.314	0.9215
Cal121760C	orf19.4818	0.592	1.25	0.921
Cal412470C	orf19.1237	0.783	1.059	0.921
Cal309310W	orf19.913.2	0.579	1.263	0.921
Cal103890W	orf19.4546	0.617	1.223	0.92
Cal105280W	orf19.2925:orf19.2926	0.664	1.175	0.9195
Cal224170W	orf19.5364	0.553	1.286	0.9195
Cal105490W	orf19.2936	0.64	1.198	0.919
Cal133200C	orf19.7270	0.544	1.294	0.919
Cal412440C	orf19.1236	0.475	1.362	0.9185
Cal408790W	orf19.1595	0.611	1.226	0.9185
Cal704410C	orf19.6515	0.693	1.144	0.9185
Cal705460W	orf19.6460	0.632	1.202	0.917
Cal506150W	orf19.4304	0.589	1.243	0.916
Cal114560W	orf19.6266	0.403	1.428	0.9155
Cal220310W	orf19.203	0.538	1.29	0.914
Cal701750C	orf19.7034	0.561	1.267	0.914
Cal106250W	orf19.2967	0.492	1.335	0.9135
Cal131500C	orf19.5010:orf19.5011	0.531	1.296	0.9135
Cal705130C	orf19.6477	0.611	1.216	0.9135
CalR09100W	orf19.484	0.48	1.344	0.912
Cal109360C	orf19.1051	0.59	1.234	0.912
Cal508730C	orf19.3216	0.59	1.233	0.9115
Cal610370W	orf19.2160	0.575	1.248	0.9115
Cal313970W	orf19.7383	0.606	1.216	0.911
Cal109180C	orf19.1041	1.05	0.769	0.9095
Cal412910W	orf19.1260:orf19.1261	0.591	1.228	0.9095
Cal121610W	orf19.4809	0.696	1.122	0.909
CalR05680C	orf19.169	0.604	1.213	0.9085
Cal105340W	orf19.2928	0.558	1.255	0.9065
Cal203920W	orf19.1491:orf19.1492	0.589	1.224	0.9065
Cal218620C	orf19.1351	0.651	1.162	0.9065
Cal309710C	orf19.5869	0.55	1.263	0.9065
Cal129960C	orf19.4934	0.62	1.192	0.906
Cal222780C	orf19.1769	0.594	1.216	0.905
Cal402330C	orf19.4684.2	0.54	1.27	0.905
Cal405900W	orf19.2737	0.624	1.186	0.905
Cal114590C	orf19.6265	0.456	1.353	0.9045
Cal313960W	orf19.7382	0.472	1.335	0.9035
Cal602360C	orf19.115	0.527	1.28	0.9035
Cal409550C	orf19.1426	0.505	1.301	0.903
CalR05980C	snR5c	0.661	1.141	0.901
Cal405040C	orf19.4560,orf19.2775	0.617	1.184	0.9005
Cal605920W	orf19.5537	0.595	1.206	0.9005
Cal104600W	orf19.3665	0.473	1.327	0.9
Cal112400C	orf19.413.1	0.441	1.358	0.8995
Cal114610W	orf19.6264.4	0.61	1.189	0.8995
Cal105610C	orf19.2941	0.505	1.293	0.899
CalR23080W	orf19.7611	0.561	1.236	0.8985
Cal127180C	orf19.1137	0.576	1.219	0.8975
Cal130630W	orf19.4963	0.426	1.369	0.8975
CalR21940W	orf19.7553	0.57	1.225	0.8975
Cal114220W	snR44a	0.518	1.274	0.896
Cal505600C	orf19.4269	0.611	1.181	0.896
Cal115810W	tL(UAA)4:orf19.6208	0.503	1.289	0.896
Cal115860C	orf19.6203	0.569	1.222	0.8955
Cal301760W	orf19.3071	0.565	1.224	0.8945
Cal508910W	orf19.3210	0.545	1.243	0.894
Cal605310W	orf19.3481	1.412	0.376	0.894
Cal703360W	orf19.6570	0.592	1.196	0.894
Cal112650W	orf19.2492	0.449	1.338	0.8935
Cal307200C	orf19.309	0.659	1.128	0.8935
CalR15760C	orf19.2360	0.656	1.13	0.893
Cal402420W	orf19.4680	0.428	1.357	0.8925
Cal509570C	orf19.3912	0.467	1.316	0.8915
Cal107640C	orf19.3042	-0.06	1.843	0.8915
Cal220440C	orf19.198	0.486	1.297	0.8915
Cal101570W	orf19.6033	0.619	1.163	0.891
Cal129330W	orf19.6341	0.683	1.099	0.891
Cal708250C	orf19.5501	0.513	1.269	0.891
Cal405740C	orf19.2746	0.581	1.2	0.8905
Cal509040W	orf19.1282	0.518	1.263	0.8905
Cal606930W	orf19.5595	0.672	1.108	0.89
Cal412780C	orf19.1254	0.709	1.071	0.89
Cal203770W	orf19.1486	0.399	1.38	0.8895
Cal412130C	orf19.1795.1	0.635	1.144	0.8895
Cal217780W	orf19.2186	0.482	1.296	0.889
Cal309830W	orf19.5874:orf19.5875	0.659	1.118	0.8885
Cal703190W	orf19.6579	0.555	1.221	0.888
Cal130240W	orf19.4948	0.435	1.337	0.886
Cal408390W	orf19.1305:orf19.1304	0.467	1.3	0.8835
Cal309940W	orf19.5884	0.618	1.149	0.8835
CalR09260W	orf19.492	0.542	1.224	0.883
Cal406730C	orf19.2690	0.551	1.214	0.8825
Cal310520W	orf19.5920	0.534	1.23	0.882
Cal303560C	orf19.1690	0.52	1.242	0.881
Cal510380W	orf19.3949	0.583	1.179	0.881
Cal222530C	orf19.1780	0.391	1.37	0.8805
Cal414460W	orf19.2886	0.486	1.275	0.8805
Cal123300W	orf19.4885	0.431	1.329	0.88
Cal128030W	orf19.5243	0.558	1.201	0.8795
Cal116870W	orf19.4426	1.107	0.652	0.8795
Cal109660C	orf19.1065	0.603	1.155	0.879
Cal405250W	orf19.2768	0.73	1.028	0.879
Cal217300W	orf19.2209	0.534	1.223	0.8785
Cal702190C	orf19.7014	0.331	1.425	0.878
CalR21090W	tD(GUC)7	0.893	0.863	0.878
Cal128410W	orf19.5226	0.61	1.146	0.878
Cal506550W	orf19.4326	0.5	1.254	0.877
Cal118060W	orf19.5067	0.415	1.338	0.8765
Cal500860W	orf19.949	0.392	1.361	0.8765
Cal221730C	orf19.1388	0.642	1.11	0.876
Cal123410W	orf19.4889	0.562	1.19	0.876
Cal219260W	orf19.3618	0.528	1.224	0.876
CalR08710W	orf19.4355	0.413	1.339	0.876
Cal123460W	orf19.4890	0.446	1.305	0.8755
Cal512030W	orf19.4046	0.49	1.261	0.8755
Cal210360W	orf19.4490.2	0.534	1.216	0.875
Cal411950W	orf19.1290	0.526	1.224	0.875
Cal114620C	orf19.6264.3	0.396	1.353	0.8745
CalR10890C	orf19.6308	0.575	1.174	0.8745
Cal500130W	orf19.5694	0.814	0.93	0.872
Cal312720W	orf19.6988	0.524	1.218	0.871
Cal408920C	orf19.1208	0.838	0.903	0.8705
Cal411080W	orf19.3788.1	0.345	1.396	0.8705
Cal221420C	snR68	0.506	1.233	0.8695
Cal706530C	orf19.5157	0.466	1.272	0.869
CalR23170C	orf19.7618	0.524	1.214	0.869
Cal211980W	orf19.3563	0.366	1.371	0.8685
Cal221400W	snR44c	0.5	1.236	0.868
Cal101900W	orf19.6018	0.45	1.284	0.867
Cal210800W	orf19.190	0.485	1.249	0.867
Cal601310W	orf19.4194	0.469	1.263	0.866
Cal604580W	orf19.3504	0.594	1.138	0.866
Cal108920C	orf19.4473	0.485	1.245	0.865
Cal218660W	orf19.1350	0.768	0.962	0.865
Cal609350W	orf19.73	0.566	1.164	0.865
Cal222610W	orf19.1777	0.441	1.287	0.864
Cal311920W	orf19.5999	0.572	1.154	0.863
Cal113770W	orf19.2433	0.624	1.101	0.8625
CalR09240C	orf19.492	0.478	1.247	0.8625
Cal130860W	orf19.4979	0.735	0.988	0.8615
Cal212140C	orf19.3571	0.584	1.139	0.8615
Cal511330W	orf19.4001	0.565	1.158	0.8615
Cal129770W	snR41	0.577	1.145	0.861
Cal119580C	orf19.407	0.608	1.113	0.8605
Cal130040C	orf19.4939	0.499	1.222	0.8605
Cal131910W	orf19.5027	0.535	1.186	0.8605
Cal702200W	orf19.7014:orf19.7013,orf19.7015	0.366	1.354	0.86
CalR08510W	orf19.4375	0.512	1.208	0.86
CalR18340C	orf19.6375	0.535	1.184	0.8595
Cal130930W	orf19.4981	0.601	1.116	0.8585
Cal609700C	orf19.1089	0.603	1.114	0.8585
Cal407430W	orf19.1438	0.451	1.265	0.858
Cal411500C	orf19.740	0.433	1.282	0.8575
Cal511640C	orf19.4018	0.509	1.205	0.857
CalR16960W	orf19.2623	0.58	1.134	0.857
Cal128050C	orf19.5242	0.247	1.466	0.8565
Cal129370C	orf19.4913	0.634	1.078	0.856
Cal604970W	orf19.3463	0.545	1.167	0.856
Cal100350C	orf19.6090	0.448	1.262	0.855
Cal116800W	orf19.4428	0.6	1.109	0.8545
Cal203010W	orf19.1445	0.451	1.254	0.8525
Cal318010C	orf19.6709	0.488	1.217	0.8525
Cal121780C	orf19.4819	0.649	1.053	0.851
Cal219860W	orf19.3585	0.468	1.234	0.851
CalR05590W	orf19.173	0.525	1.177	0.851
Cal212680W	orf19.6875	0.553	1.146	0.8495
Cal605080C	orf19.3469	0.725	0.974	0.8495
Cal609150C	orf19.4557	0.507	1.192	0.8495
CalR02250W	orf19.3260	0.47	1.228	0.849
Cal601570W	orf19.3646	0.526	1.171	0.8485
Cal132710C	orf19.7238	0.635	1.061	0.848
Cal100120W	orf19.6112,orf19.2661,orf19.362,orf19.3074,orf19.7544,orf19.7276.1,tL(CAA)5	0.41	1.285	0.8475
Cal407710W	orf19.3374	0.548	1.146	0.847
CalR01450W	orf19.7475	0.473	1.221	0.847
Cal405870W	orf19.2738	0.603	1.09	0.8465
Cal707930W	orf19.6692	0.462	1.231	0.8465
Cal216500W	orf19.1900	0.627	1.063	0.845
Cal124530W	orf19.1833	0.496	1.193	0.8445
Cal305730W	orf19.233.1	0.448	1.24	0.844
Cal120590W	orf19.4764	0.461	1.226	0.8435
Cal113220C	orf19.2459	0.583	1.103	0.843
Cal301290W	orf19.5402	0.493	1.193	0.843
Cal508750W	orf19.3215	0.598	1.088	0.843
Cal310710W	orf19.5931	0.482	1.203	0.8425
Cal415420W	orf19.3121	0.656	1.029	0.8425
CalR17880W	orf19.610	0.488	1.197	0.8425
Cal118030W	snR67	0.518	1.166	0.842
Cal702770W	orf19.6910,orf19.6912	0.538	1.145	0.8415
Cal222660C	orf19.1774	0.51	1.172	0.841
Cal126340C	orf19.657	0.507	1.174	0.8405
Cal304730C	orf19.1643	0.568	1.113	0.8405
CalR20910W	orf19.7332	0.419	1.262	0.8405
Cal105210C	orf19.3693	0.559	1.12	0.8395
Cal317520C	snR52	0.556	1.123	0.8395
Cal415320C	orf19.3124	0.534	1.145	0.8395
Cal709200W	orf19.7150	0.454	1.223	0.8385
Cal222550W	orf19.1780	0.504	1.172	0.838
Cal708490W	orf19.7195	0.446	1.23	0.838
Cal403710W	orf19.4624	0.465	1.21	0.8375
Cal603390W	orf19.3432.1,snR189d	0.434	1.24	0.837
Cal316790C	orf19.6782	0.501	1.172	0.8365
Cal200300W	orf19.2119	0.657	1.014	0.8355
Cal221920W	orf19.1374	0.389	1.282	0.8355
Cal116590W	orf19.4438	0.465	1.205	0.835
Cal210330W	orf19.4491	0.445	1.225	0.835
Cal126230W	orf19.663	0.534	1.136	0.835
Cal316650W	orf19.6789	0.519	1.151	0.835
CalR23930C	orf19.7675	0.456	1.214	0.835
Cal507500W	orf19.2638	0.387	1.28	0.8335
Cal507790W	orf19.6663:orf19.6665	0.274	1.393	0.8335
CalR04300W	orf19.2594	0.538	1.129	0.8335
CalR04520W	orf19.2606,orf19.2607	0.642	1.025	0.8335
Cal123500C	orf19.4893	0.576	1.089	0.8325
CalR20200C	orf19.7300	0.468	1.197	0.8325
Cal506350C	orf19.4312	0.512	1.152	0.832
Cal100070C	orf19.6113,orf19.5369:orf19.5370,orf19.5468,orf19.4055	0.309	1.352	0.8305
Cal126300W	orf19.660	0.537	1.123	0.83
Cal101120W	orf19.6055	0.491	1.168	0.8295
Cal120840W	orf19.4774	0.505	1.154	0.8295
Cal506860W	orf19.4341	0.455	1.203	0.829
Cal202760W	orf19.1994	0.414	1.244	0.829
Cal607530C	orf19.5626	0.823	0.835	0.829
CalR00270W	orf19.7534	0.555	1.103	0.829
Cal115900W	orf19.6202	0.552	1.105	0.8285
Cal219190W	orf19.3623	0.495	1.162	0.8285
Cal414590W	orf19.2881	0.57	1.086	0.828
Cal211000C	orf19.4125	0.373	1.283	0.828
Cal605030W	orf19.3467	0.424	1.232	0.828
Cal411880W	orf19.2631	0.538	1.117	0.8275
Cal314490C	orf19.7412	0.458	1.195	0.8265
Cal509940W	orf19.3931	0.528	1.125	0.8265
Cal106680W	orf19.2990	0.655	0.997	0.826
Cal412770W	orf19.1253	0.422	1.23	0.826
Cal101890W	orf19.6020	0.492	1.159	0.8255
Cal130560W	orf19.4960	0.394	1.257	0.8255
Cal112210W	orf19.423	0.585	1.065	0.825
Cal130120W	orf19.4943	0.474	1.174	0.824
Cal407590W	orf19.3367	0.535	1.112	0.8235
Cal313690W	orf19.7371	0.456	1.191	0.8235
CalR10530C	tS(GCU)1:orf19.1735	0.586	1.061	0.8235
Cal204230W	orf19.1509	0.561	1.084	0.8225
Cal219500C	orf19.3609:orf19.3608	0.422	1.223	0.8225
Cal202350W	orf19.2012	0.553	1.091	0.822
Cal708340W	orf19.7202	0.525	1.118	0.8215
CalR01740W	tT(AGU)3	0.498	1.145	0.8215
CalR05250W	orf19.3734	0.409	1.234	0.8215
Cal120370W	orf19.4754	0.461	1.18	0.8205
Cal601660W	orf19.3642	0.549	1.092	0.8205
Cal132270C	orf19.7215.3	0.404	1.236	0.82
Cal707980C	orf19.6694	0.461	1.179	0.82
CalR22170C	orf19.7566	0.141	1.499	0.82
Cal114890C	orf19.6252	0.47	1.17	0.82
Cal604420C	orf19.690	0.453	1.186	0.8195
CalR03410C	orf19.2533.1	0.411	1.228	0.8195
Cal208910W	orf19.828	0.499	1.14	0.8195
Cal113900W	orf19.2661,orf19.1925,orf19.6191,orf19.362,orf19.3074,orf19.5700,orf19.4054,orf19.6337,orf19.7127	0.411	1.227	0.819
Cal310660W	orf19.5928	0.316	1.322	0.819
CalR10830W	orf19.6310	0.665	0.973	0.819
Cal223820W	orf19.5340	0.449	1.187	0.818
Cal603010C	orf19.3444	0.457	1.179	0.818
Cal120790W	orf19.4772	0.419	1.215	0.817
Cal414480C	orf19.2885	0.522	1.112	0.817
Cal603000W	orf19.3444	0.482	1.152	0.817
Cal313240C	orf19.7355	0.393	1.24	0.8165
Cal410730C	orf19.3803	0.385	1.246	0.8155
CalR10500W	tS(GCU)2	0.443	1.187	0.815
Cal607160W	orf19.5607	0.493	1.137	0.815
CalR10640W	orf19.6316.4	0.406	1.223	0.8145
Cal106260C	orf19.2968	0.392	1.236	0.814
Cal210430W	orf19.4488	0.373	1.255	0.814
Cal212010C	orf19.3564	0.511	1.115	0.813
Cal501650W	orf19.576	0.073	1.553	0.813
Cal410830W	orf19.3799	0.697	0.928	0.8125
CalR03840C	orf19.2560	0.327	1.298	0.8125
Cal200010C	orf19.3073	0.487	1.137	0.812
CalR18020W	orf19.603	0.356	1.268	0.812
Cal102240C	orf19.3291	0.601	1.023	0.812
Cal301840W	orf19.1289	0.446	1.178	0.812
Cal108470C	orf19.1032	0.337	1.286	0.8115
Cal605400W	orf19.3483	0.49	1.133	0.8115
Cal202340W	orf19.2013	0.346	1.277	0.8115
Cal212670W	orf19.6874	0.484	1.137	0.8105
Cal222310W	orf19.1359	0.396	1.225	0.8105
Cal101840W	orf19.6021	0.528	1.092	0.81
Cal203820W	tL(CAA)1	0.383	1.237	0.81
Cal413740W	orf19.2923	0.459	1.161	0.81
CalR10520W	tS(GCU)1:orf19.1735	0.514	1.106	0.81
Cal220680W	orf19.4078	0.436	1.184	0.81
CalR02570C	orf19.3242	0.458	1.162	0.81
Cal309610W	orf19.5863	0.393	1.226	0.8095
Cal204880W	orf19.1541	0.64	0.978	0.809
Cal111540C	orf19.4060	0.411	1.204	0.8075
Cal127010W	orf19.1144	0.447	1.167	0.807
CalR05000W	orf19.3746	0.409	1.205	0.807
CalR14860C	orf19.699	0.439	1.175	0.807
Cal508550W	orf19.1106	0.502	1.11	0.806
Cal113580C	orf19.2442	0.553	1.058	0.8055
Cal204530C	orf19.1525	0.424	1.186	0.805
Cal704740W	snR8c	0.442	1.166	0.804
Cal213620W	tM(CAU)3,orf19.4114	0.501	1.106	0.8035
Cal124560C	orf19.1835	0.385	1.222	0.8035
Cal600440C	LSU-G1431:orf19.1181,LSU-G1431	0.583	1.024	0.8035
Cal204190C	orf19.1508	0.494	1.112	0.803
Cal219480C	orf19.3609	0.422	1.183	0.8025
Cal401420W	orf19.4176	0.471	1.134	0.8025
Cal602900W	orf19.3449	0.424	1.181	0.8025
Cal315020W	orf19.7434	0.481	1.122	0.8015
Cal125490W	orf19.2309.2,orf19.2309	0.484	1.118	0.801
Cal703090C	orf19.6584	0.505	1.097	0.801
Cal606130W	orf19.5549	0.381	1.22	0.8005
Cal510140C	orf19.3940	0.511	1.089	0.8
CalR15620W	orf19.2367	0.462	1.137	0.7995
CalR06430W	orf19.2843	0.455	1.143	0.799
Cal217250W	orf19.2212:orf19.2211	0.412	1.186	0.799
Cal502460W	orf19.1960	0.535	1.061	0.798
Cal602570C	orf19.125,orf19.3433	0.401	1.195	0.798
Cal312240W	orf19.6971	0.489	1.106	0.7975
Cal314200W	orf19.7393	0.473	1.122	0.7975
Cal402100W	orf19.4699	0.447	1.148	0.7975
Cal123930C	orf19.4910	0.425	1.169	0.797
Cal206860W	orf19.5792	0.504	1.09	0.797
Cal407380W	orf19.1440	0.507	1.087	0.797
Cal119100C	orf19.385	0.463	1.13	0.7965
Cal705750W	orf19.3701	0.491	1.102	0.7965
CalR23660W	orf19.7654	0.625	0.968	0.7965
Cal702760C	orf19.6910	0.417	1.175	0.796
Cal408670C	orf19.5042	0.487	1.104	0.7955
CalR08980W	orf19.475	0.506	1.085	0.7955
Cal202710C	orf19.1995	0.482	1.108	0.795
Cal302480W	orf19.2514	0.429	1.159	0.794
Cal316470W	orf19.6795	0.34	1.248	0.794
Cal305410W	orf19.1614	0.42	1.167	0.7935
Cal312260W	orf19.6972	0.361	1.226	0.7935
Cal506930W	orf19.4347	0.492	1.094	0.793
Cal608150W	orf19.5732	0.504	1.082	0.793
CalR01570C	orf19.7466	0.339	1.246	0.7925
Cal102940W	orf19.3325	0.368	1.216	0.792
Cal118020W	snR67	0.526	1.058	0.792
Cal109100W	orf19.4481	0.415	1.168	0.7915
Cal305950C	orf19.243	0.478	1.105	0.7915
Cal701560W	orf19.7043.1	0.433	1.15	0.7915
CalR22630W	orf19.7590	0.485	1.097	0.791
Cal110770W	orf19.768	0.448	1.133	0.7905
Cal705630W	orf19.6453	0.458	1.123	0.7905
CalR05640W	orf19.171	0.555	1.026	0.7905
Cal406290W	orf19.2713	0.393	1.187	0.79
Cal403910W	orf19.4616	0.679	0.9	0.7895
Cal311890W	orf19.5996.1	0.236	1.343	0.7895
Cal317780C	orf19.6726	0.444	1.134	0.789
CalR13580W	orf19.3859	0.549	1.029	0.789
Cal104920C	orf19.3680	0.471	1.106	0.7885
CalR23740C	orf19.7660	0.432	1.143	0.7875
Cal132430C	orf19.7222	0.351	1.223	0.787
Cal404260C	orf19.4599	0.389	1.185	0.787
Cal114650C	snR189a:orf19.6264	0.4	1.174	0.787
Cal209970C	orf19.4509	0.469	1.104	0.7865
Cal312220C	orf19.6970	0.567	1.006	0.7865
Cal412900C	orf19.1260	0.532	1.041	0.7865
Cal502560C	snR189c,snR69	0.504	1.069	0.7865
Cal213900C	orf19.5484	0.543	1.029	0.786
Cal219780C	orf19.3590	0.4	1.172	0.786
Cal314710W	orf19.7400	0.5	1.072	0.786
Cal116220W	orf19.4450.1	0.408	1.163	0.7855
Cal117650C	orf19.728	0.433	1.138	0.7855
Cal206380C	orf19.5815	0.442	1.129	0.7855
Cal413800W	orf19.2920	0.427	1.143	0.785
Cal701450W	orf19.7048.1	0.608	0.961	0.7845
Cal111180W	orf19.48	0.627	0.941	0.784
Cal315420W	orf19.7449,orf19.7450	0.39	1.178	0.784
Cal317320W	orf19.6751	0.455	1.112	0.7835
Cal601690W	orf19.3642	0.413	1.154	0.7835
Cal702950C	orf19.6921	0.452	1.115	0.7835
Cal102430C	orf19.3301	0.326	1.24	0.783
CalR01100C	orf19.7489	0.372	1.194	0.783
Cal506430W	orf19.4317	0.453	1.112	0.7825
Cal118410W	orf19.5083	0.302	1.263	0.7825
Cal406740W	orf19.2690	0.436	1.129	0.7825
Cal104610C	orf19.3666	0.507	1.057	0.782
Cal214190W	orf19.5499	0.356	1.207	0.7815
Cal122260C	orf19.4841	0.431	1.132	0.7815
CalR23710W	orf19.7657	0.429	1.134	0.7815
Cal408110W	tQ(UUG)1	0.544	1.018	0.781
Cal125710W	orf19.2298	0.265	1.296	0.7805
Cal410580W	tQ(UUG)4:orf19.3812	0.483	1.076	0.7795
CalR01230C	SNRNAU5	0.534	1.025	0.7795
Cal112600C	orf19.2495	0.461	1.097	0.779
Cal506100W	orf19.4299	0.411	1.147	0.779
Cal108290W	orf19.1133	0.478	1.079	0.7785
Cal109650W	orf19.1064	0.593	0.963	0.778
Cal129340C	orf19.6340	0.519	1.037	0.778
Cal311060C	orf19.5953	0.45	1.106	0.778
Cal604860W	orf19.3460	0.474	1.082	0.778
CalR07400W	orf19.2395	0.126	1.43	0.778
CalR08130W	orf19.4381	0.402	1.154	0.778
Cal310910W	orf19.5943	0.475	1.08	0.7775
Cal703020W	orf19.6587	0.67	0.885	0.7775
Cal304620C	orf19.1651	0.474	1.081	0.7775
CalR04800W	orf19.2618	0.319	1.236	0.7775
Cal708210W	orf19.5504	1.165	0.389	0.777
Cal127360W	orf19.5280	0.364	1.19	0.777
Cal310250C	orf19.5906	0.521	1.032	0.7765
Cal111450W	orf19.4064	0.435	1.117	0.776
Cal501890W	orf19.585	0.435	1.117	0.776
CalR21970W	orf19.7554	0.357	1.195	0.776
Cal600350W	orf19.6321	0.352	1.199	0.7755
Cal113730C	orf19.2434	0.524	1.026	0.775
Cal129230W	orf19.6345	0.506	1.044	0.775
CalR23790W	orf19.7663	0.476	1.073	0.7745
Cal210050W	orf19.4506	0.417	1.131	0.774
CalR10760W	orf19.6312	0.587	0.961	0.774
Cal701190W	orf19.7062	0.428	1.119	0.7735
Cal125460W	orf19.2310	0.472	1.074	0.773
Cal200880C	orf19.2084	0.393	1.153	0.773
Cal505570W	orf19.4266	0.409	1.137	0.773
CalR21280C	orf19.6608	0.332	1.214	0.773
Cal214890C	orf19.1296	0.535	1.011	0.773
Cal109160W	orf19.1039:orf19.1040	0.241	1.304	0.7725
Cal405080W	orf19.2772	0.487	1.058	0.7725
Cal114210W	snR5b,snR44a	0.491	1.053	0.772
Cal605540C	orf19.5518	0.404	1.139	0.7715
Cal507580W	snR40	0.371	1.172	0.7715
Cal129610C	orf19.4922	0.356	1.186	0.771
Cal406190C	orf19.2722	0.376	1.166	0.771
CalR02500C	orf19.3247	0.505	1.037	0.771
Cal129260C	orf19.6343	0.49	1.051	0.7705
Cal209110W	orf19.815	0.678	0.863	0.7705
Cal408430C	orf19.1303,orf19.1302	0.478	1.062	0.77
Cal312520W	orf19.6982	0.553	0.986	0.7695
Cal500570C	orf19.968	0.368	1.171	0.7695
Cal127520W	orf19.5271,orf19.5270	0.577	0.962	0.7695
Cal400020C	orf19.362,orf19.3074	0.399	1.14	0.7695
Cal504880W	orf19.4231	0.418	1.121	0.7695
Cal302970W	orf19.1719	0.549	0.989	0.769
Cal411390C	orf19.3773	0.395	1.143	0.769
Cal707910W	orf19.6691	0.3	1.238	0.769
CalR09250W	orf19.492	0.403	1.135	0.769
Cal411790W	orf19.6862	0.674	0.862	0.768
Cal122860W	orf19.4866	0.442	1.093	0.7675
Cal131280W	orf19.5001	0.377	1.156	0.7665
Cal100700C	orf19.6073	0.502	1.03	0.766
CalR00400W	orf19.7521	0.459	1.073	0.766
Cal313990W	orf19.7383	0.349	1.181	0.765
Cal219120C	orf19.3626	0.532	0.996	0.764
Cal410130C	orf19.3838,snR18	0.482	1.046	0.764
Cal509340C	orf19.3902	0.411	1.117	0.764
Cal120870W	orf19.4775	0.374	1.153	0.7635
Cal100520W	orf19.6080	0.425	1.101	0.763
Cal303570W	orf19.1690	0.468	1.058	0.763
Cal609720C	orf19.1090	0.46	1.066	0.763
Cal208870W	orf19.829	0.385	1.14	0.7625
Cal602880C	orf19.3449.2	0.379	1.146	0.7625
Cal100500W	orf19.6081	0.387	1.137	0.762
Cal203670W	orf19.1481:orf19.1482	0.33	1.194	0.762
CalR23800C	orf19.7664	0.396	1.127	0.7615
Cal708990C	orf19.7161	0.422	1.101	0.7615
Cal200990C	orf19.2077	0.342	1.18	0.761
Cal705610C	orf19.6455	0.511	1.011	0.761
Cal602410C	orf19.118	0.283	1.238	0.7605
Cal129270W	orf19.6343	0.328	1.192	0.76
Cal305390C	orf19.1616	0.482	1.038	0.76
Cal608560W	orf19.5755	0.486	1.034	0.76
CalR14930C	orf19.701	0.459	1.061	0.76
Cal406110W	orf19.2726	0.286	1.233	0.7595
Cal205360C	orf19.1569	0.421	1.097	0.759
CalR08440W	orf19.4372	0.425	1.092	0.7585
Cal110490C	orf19.781	0.434	1.082	0.758
Cal215260C	orf19.2231	0.403	1.113	0.758
Cal216460W	orf19.1902	0.536	0.98	0.758
Cal406910C	orf19.2681	0.376	1.139	0.7575
Cal607610C	orf19.5629	0.554	0.961	0.7575
Cal130740C	orf19.4969	0.466	1.049	0.7575
Cal304020W	orf19.1671	0.365	1.15	0.7575
Cal105250W	orf19.3694	0.529	0.985	0.757
Cal126850W	orf19.1150.1	0.335	1.179	0.757
Cal216560C	orf19.1893	0.426	1.088	0.757
Cal500580W	orf19.968	0.432	1.081	0.7565
Cal702870W	orf19.6917:orf19.6918	0.372	1.14	0.756
Cal702940W	orf19.6920	0.296	1.215	0.7555
CalR03030W	orf19.3222	0.348	1.163	0.7555
Cal602330W	orf19.113	0.51	1.001	0.7555
Cal706370W	orf19.5166	0.456	1.055	0.7555
CalR21100W	tD(GUC)7	0.398	1.112	0.755
Cal210510C	orf19.147	0.381	1.129	0.755
Cal410860C	orf19.3798	0.434	1.076	0.755
Cal502990W	orf19.1934	0.643	0.866	0.7545
Cal411520W	orf19.740	0.456	1.052	0.754
Cal414410W	orf19.2887	0.477	1.031	0.754
Cal507220C	orf19.2650	0.246	1.26	0.753
Cal702810C	orf19.6913	0.373	1.133	0.753
Cal111160W	orf19.750	0.397	1.107	0.752
Cal415680W	orf19.3106	0.403	1.101	0.752
Cal102650W	orf19.3310	0.465	1.038	0.7515
Cal408700W	orf19.5045	0.574	0.928	0.751
Cal406860W	orf19.2684	0.387	1.114	0.7505
Cal708390C	orf19.7199	0.383	1.118	0.7505
Cal101180W	orf19.6052	0.442	1.059	0.7505
Cal500090W	orf19.5698	0.299	1.202	0.7505
Cal203490W	orf19.1473	0.438	1.062	0.75
Cal209220C	orf19.811	0.354	1.146	0.75
Cal104360W	orf19.4526	0.372	1.127	0.7495
Cal124570W	orf19.1835	0.296	1.203	0.7495
Cal410600W	orf19.3812	0.429	1.07	0.7495
Cal605440C	orf19.5513	0.326	1.173	0.7495
Cal215220W	orf19.2228	0.492	1.006	0.749
Cal608490W	orf19.5753	0.41	1.088	0.749
Cal129720W	orf19.4928	0.368	1.128	0.748
Cal413810C	orf19.2920	0.346	1.15	0.748
Cal315450W	orf19.7451	0.203	1.292	0.7475
Cal216120C	orf19.2275	0.491	1.003	0.747
Cal605630C	orf19.5522	0.433	1.06	0.7465
Cal221080W	orf19.563	0.454	1.039	0.7465
Cal413330W	orf19.4404	0.354	1.139	0.7465
Cal211170W	orf19.3526	0.532	0.96	0.746
Cal314070W	orf19.7387	0.413	1.079	0.746
Cal111980W	orf19.434:tP(UGG)1	0.386	1.104	0.745
Cal506760W	orf19.4337	0.405	1.085	0.745
CalR18760W	orf19.6402	0.351	1.139	0.745
Cal304310W	tV(AAC)2,orf19.1662	0.534	0.955	0.7445
Cal504220W	orf19.3182	0.36	1.129	0.7445
Cal506880C	orf19.4342	0.511	0.978	0.7445
Cal303610W	orf19.1687	0.39	1.097	0.7435
Cal505380W	orf19.4257	0.419	1.067	0.743
Cal707300C	orf19.1342	0.448	1.037	0.7425
CalR23270C	orf19.7624	0.489	0.996	0.7425
CalR09090C	orf19.484	0.433	1.05	0.7415
Cal122770W	orf19.4863	0.644	0.837	0.7405
Cal215690C	orf19.2252	0.247	1.234	0.7405
Cal605250W	orf19.3476	0.37	1.111	0.7405
Cal103410W	orf19.3348	0.361	1.119	0.74
Cal133260C	orf19.7274	0.329	1.151	0.74
Cal201500W	orf19.2054	0.398	1.082	0.74
Cal125420W	orf19.2310.1	0.381	1.098	0.7395
Cal414440C	orf19.2886	0.483	0.996	0.7395
CalR22140C	orf19.7565	0.358	1.121	0.7395
Cal607680W	orf19.5704	0.428	1.051	0.7395
Cal709100C	orf19.7154	0.343	1.136	0.7395
Cal103620C	orf19.3357	0.366	1.112	0.739
Cal308020W	orf19.345	0.395	1.083	0.739
CalR13480W	orf19.3854	0.521	0.957	0.739
Cal314840W	orf19.7421	0.225	1.252	0.7385
Cal502290W	orf19.1968	0.187	1.29	0.7385
Cal125370W	orf19.2312	0.341	1.136	0.7385
Cal509330W	orf19.3902	0.345	1.131	0.738
Cal604350C	orf19.688	0.448	1.028	0.738
Cal708070W	orf19.6702	0.398	1.078	0.738
Cal120480W	orf19.4758	0.509	0.966	0.7375
Cal306080C	orf19.251	0.501	0.974	0.7375
Cal200610W	orf19.2103	0.555	0.919	0.737
Cal125810C	orf19.680	0.422	1.052	0.737
Cal209260C	orf19.809	0.347	1.127	0.737
Cal315970W	orf19.6818	0.412	1.062	0.737
CalR16320W	orf19.6143	0.453	1.021	0.737
CalR08280C	orf19.4367	0.657	0.816	0.7365
Cal107490W	orf19.3035	0.409	1.063	0.736
Cal203230C	orf19.1458	0.399	1.073	0.736
Cal312270W	orf19.6972	0.354	1.118	0.736
Cal402400W	orf19.4681	0.372	1.098	0.735
Cal105960W	orf19.2957	0.418	1.052	0.735
Cal222240C	orf19.1361	0.444	1.026	0.735
Cal405940C	orf19.2735	0.598	0.872	0.735
Cal317300C	orf19.6752	0.42	1.049	0.7345
Cal204180W	orf19.1507	0.366	1.102	0.734
Cal306440C	orf19.267	0.395	1.073	0.734
Cal130940C	snR3a	0.461	1.006	0.7335
Cal407510W	orf19.3364	0.609	0.858	0.7335
Cal301240W	orf19.5404.1	0.361	1.104	0.7325
Cal507010W	orf19.4349	0.328	1.137	0.7325
Cal209350W	orf19.805	0.445	1.019	0.732
Cal220010C	orf19.217	0.33	1.134	0.732
Cal510130W	orf19.3938	0.554	0.91	0.732
CalR01120C	orf19.7489,snR35a	0.297	1.166	0.7315
Cal107460C	orf19.3034	0.386	1.076	0.731
Cal105240W	orf19.3694	0.427	1.035	0.731
Cal305240C	orf19.1620	0.445	1.017	0.731
Cal501200W	orf19.935	0.272	1.19	0.731
Cal701720W	orf19.7036	0.439	1.022	0.7305
Cal705770C	orf19.3700	0.537	0.924	0.7305
CalR21420C	orf19.6601.1	0.442	1.019	0.7305
Cal500380W	orf19.980	0.345	1.113	0.729
Cal609180W	orf19.4557	0.419	1.039	0.729
CalR16260C	orf19.6147	0.284	1.174	0.729
CalR17440W	orf19.1988	0.294	1.163	0.7285
Cal214990C	orf19.1225	0.414	1.043	0.7285
Cal109860C	orf19.5201	0.456	1	0.728
Cal708050C	orf19.6701	0.399	1.057	0.728
CalR00650W	orf19.7509.2	0.394	1.062	0.728
CalR05120W	orf19.3738	0.296	1.16	0.728
Cal120470C	orf19.4758	0.629	0.826	0.7275
CalR16280C	orf19.6146	0.192	1.263	0.7275
Cal200440W	orf19.2111.2	0.301	1.153	0.727
Cal502350C	orf19.1964	0.401	1.053	0.727
Cal316690W	orf19.6787	0.476	0.977	0.7265
Cal110900C	orf19.760	0.368	1.084	0.726
Cal317050W	orf19.6769	0.329	1.123	0.726
CalR15780W	orf19.2360	0.405	1.047	0.726
Cal120300W	snR190	0.362	1.089	0.7255
Cal304060C	orf19.1670	0.411	1.04	0.7255
Cal507250C	orf19.2649	0.314	1.137	0.7255
Cal603290W	orf19.3434	0.465	0.986	0.7255
Cal128820C	orf19.3759	0.271	1.179	0.725
CalR20870C	orf19.7330	0.414	1.036	0.725
Cal125080W	orf19.2330	0.337	1.111	0.724
Cal205090W	orf19.1551	0.399	1.049	0.724
Cal511760W	orf19.4025	0.396	1.052	0.724
Cal604260W	orf19.685	0.353	1.095	0.724
Cal708240W	orf19.5502	0.528	0.92	0.724
CalR13490C	orf19.3854	0.407	1.041	0.724
Cal129020W	orf19.6355	0.441	1.006	0.7235
Cal705050C	orf19.6480	0.405	1.042	0.7235
CalR20400W	orf19.7307	0.306	1.141	0.7235
Cal313910W	orf19.7381	0.43	1.015	0.7225
Cal402460W	orf19.4679	0.352	1.093	0.7225
Cal114380W	orf19.6274	0.424	1.02	0.722
Cal132370C	orf19.7219	0.517	0.927	0.722
Cal306690W	orf19.278:orf19.279	0.432	1.012	0.722
Cal702850W	orf19.6916	0.399	1.045	0.722
Cal117480W	orf19.1227	0.333	1.11	0.7215
Cal105500C	orf19.2936	0.387	1.055	0.721
Cal602380C	orf19.115:orf19.117	0.371	1.07	0.7205
Cal406570W	orf19.2698:orf19.2697	0.338	1.102	0.72
Cal204240W	orf19.1509	0.288	1.152	0.72
Cal511120C	orf19.3990	0.389	1.051	0.72
Cal216530W	orf19.1896	0.361	1.078	0.7195
Cal500400W	orf19.979	0.518	0.921	0.7195
Cal216080W	orf19.2272	0.422	1.017	0.7195
Cal118530W	orf19.5094	0.408	1.03	0.719
Cal415110C	orf19.3133	0.339	1.098	0.7185
Cal114030C	orf19.1826	0.397	1.039	0.718
Cal214080W	orf19.5493	0.37	1.066	0.718
Cal304960C	orf19.1632	0.381	1.055	0.718
Cal113040C	orf19.2469	0.382	1.052	0.717
Cal705890W	orf19.3695	0.38	1.054	0.717
Cal117990C	orf19.5065	0.418	1.016	0.717
Cal316430C	orf19.6797	0.351	1.083	0.717
Cal701350C	orf19.7052	0.313	1.121	0.717
Cal110390W	orf19.6854	0.456	0.977	0.7165
CalR09680W	orf19.518	0.395	1.038	0.7165
Cal314100W	orf19.7388:orf19.7389	0.571	0.861	0.716
Cal411060C	orf19.3789:orf19.3788.1	0.24	1.192	0.716
Cal703340W	orf19.6573	0.34	1.091	0.7155
Cal111110C	orf19.751	0.258	1.172	0.715
CalR12530W	orf19.5844	0.307	1.123	0.715
Cal102990C	orf19.3328	0.294	1.135	0.7145
Cal123240W	orf19.4884	0.454	0.975	0.7145
Cal128890W	orf19.3755	0.278	1.151	0.7145
Cal202790C	orf19.1992	0.333	1.096	0.7145
Cal600740W	orf19.1199	0.352	1.077	0.7145
Cal102400W	orf19.3300,orf19.4549,orf19.6295,orf19.6465,orf19.6464,orf19.7149,orf19.7598	0.354	1.074	0.714
Cal113370W	orf19.2452	0.388	1.04	0.714
Cal305720W	orf19.232:orf19.233.1	0.419	1.008	0.7135
Cal305610W	orf19.1606	0.643	0.783	0.713
Cal204380W	orf19.1517	0.333	1.093	0.713
Cal305230W	orf19.1621	0.421	1.004	0.7125
Cal405260C	orf19.2767	0.188	1.237	0.7125
Cal129810C	orf19.4929	0.239	1.186	0.7125
Cal301230W	orf19.5406	0.418	1.007	0.7125
Cal126590W	orf19.1164	0.434	0.99	0.712
Cal123890W	orf19.4909	0.432	0.991	0.7115
Cal124610W	orf19.1836	0.409	1.014	0.7115
Cal106740W	orf19.2992	0.399	1.023	0.711
Cal110400W	orf19.6855	0.389	1.033	0.711
Cal209810W	orf19.4517	0.327	1.095	0.711
Cal414750C	orf19.2871	0.401	1.021	0.711
Cal118810W	orf19.5106,orf19.5107	0.212	1.209	0.7105
Cal120780C	orf19.4772	0.405	1.016	0.7105
Cal111000C	orf19.756	0.479	0.942	0.7105
Cal304100C	orf19.1668	0.287	1.134	0.7105
Cal133100C	orf19.7266	0.477	0.943	0.71
Cal213340C	orf19.5214	0.325	1.095	0.71
Cal510230C	orf19.3942	0.424	0.996	0.71
CalR23900C	orf19.7672	0.353	1.067	0.71
Cal130480W	orf19.4956,orf19.4958	0.333	1.086	0.7095
Cal310450W	orf19.5917.3	0.426	0.993	0.7095
Cal507190W	orf19.2651	0.386	1.033	0.7095
Cal604680W	orf19.3498	0.203	1.215	0.709
Cal108540W	orf19.1029	0.435	0.983	0.709
Cal132590W	orf19.7231	0.246	1.171	0.7085
Cal208390C	orf19.849	0.268	1.149	0.7085
Cal607190W	orf19.5609	0.334	1.083	0.7085
Cal126240W	orf19.663	0.278	1.138	0.708
Cal213550W	orf19.4118	0.279	1.137	0.708
Cal603670C	orf19.3422	0.371	1.045	0.708
CalR07840W	orf19.4393	0.411	1.005	0.708
Cal205140W	orf19.1553	0.482	0.933	0.7075
Cal125890W	orf19.676	0.308	1.106	0.707
Cal205650W	orf19.1584	0.294	1.12	0.707
CalR08580W	orf19.4377	0.448	0.966	0.707
Cal212520W	orf19.6871	0.395	1.018	0.7065
Cal223650C	orf19.5325	0.347	1.066	0.7065
Cal602240C	orf19.107	0.34	1.073	0.7065
Cal606580W	orf19.5575	0.221	1.192	0.7065
Cal701710W	orf19.7037:orf19.7036	0.416	0.997	0.7065
Cal310180W	orf19.5903	0.394	1.019	0.7065
Cal208670W	orf19.837.1:tR(UCU)3	0.306	1.106	0.706
Cal503620W	orf19.6295	0.367	1.045	0.706
Cal604230C	orf19.684	0.378	1.034	0.706
CalR08850W	orf19.469	0.508	0.904	0.706
Cal109630C	orf19.1064	0.584	0.827	0.7055
Cal503640W	orf19.6294	0.338	1.073	0.7055
Cal311750C	orf19.5991	0.347	1.063	0.705
Cal100330W	orf19.6091	0.397	1.012	0.7045
Cal208420C	orf19.848	0.191	1.218	0.7045
Cal411670W	orf19.748	0.414	0.995	0.7045
Cal505870C	orf19.4283	0.338	1.07	0.704
Cal401140W	orf19.4190	0.277	1.13	0.7035
CalR21440W	orf19.6601.1	0.366	1.041	0.7035
Cal118350C	orf19.5079	0.434	0.972	0.703
Cal220820C	orf19.4085	0.317	1.088	0.7025
Cal511920W	orf19.4036	0.262	1.143	0.7025
CalR14440C	orf19.717	0.35	1.055	0.7025
Cal112460C	orf19.412	0.382	1.021	0.7015
Cal707610W	orf19.6704,orf19.5508	0.35	1.053	0.7015
Cal414370W	orf19.2889	0.433	0.969	0.701
Cal415250W	orf19.3128	0.397	1.004	0.7005
Cal130220C	orf19.4948	0.277	1.123	0.7
Cal224040W	orf19.5353	0.414	0.986	0.7
Cal301600C	orf19.5383	0.415	0.985	0.7
CalR18370C	orf19.6376	0.44	0.96	0.7
Cal204800W	orf19.1536	0.359	1.04	0.6995
Cal307120C	orf19.306	0.365	1.034	0.6995
Cal408750W	orf19.5046	0.327	1.072	0.6995
Cal511060C	orf19.3986	0.422	0.977	0.6995
Cal500070W	orf19.5698	0.356	1.042	0.699
Cal111250W	orf19.52	0.492	0.905	0.6985
Cal204670C	orf19.1531:orf19.1532	0.399	0.998	0.6985
Cal211270W	orf19.3529	0.248	1.149	0.6985
Cal211400C	orf19.3535	0.293	1.104	0.6985
Cal217460C	orf19.2202:orf19.2201	0.543	0.854	0.6985
Cal311010W	orf19.5952	0.336	1.061	0.6985
Cal412270C	orf19.1801	0.405	0.992	0.6985
CalR23330C	orf19.7627	0.34	1.057	0.6985
Cal101700C	orf19.6027	0.389	1.007	0.698
Cal209360C	orf19.804.1	0.386	1.01	0.698
Cal316270W	orf19.6805	0.344	1.052	0.698
Cal316820W	orf19.6124	0.353	1.043	0.698
Cal506120C	orf19.4301	0.349	1.047	0.698
Cal221640W	orf19.1392	0.6	0.795	0.6975
Cal307430C	tK(CUU)1	0.299	1.096	0.6975
Cal413780W	orf19.2921	0.378	1.017	0.6975
Cal604380W	orf19.688,orf19.689	0.237	1.158	0.6975
CalR11120W	orf19.1806	0.394	1.001	0.6975
Cal131700W	orf19.5020	0.298	1.096	0.697
CalR06080W	orf19.2828	0.396	0.998	0.697
Cal510270C	orf19.3944	0.313	1.081	0.697
CalR13020W	tP(UGG)4	0.32	1.072	0.696
Cal313440W	snR44d	0.236	1.156	0.696
Cal400640C	orf19.5660	0.379	1.013	0.696
Cal414970W	orf19.3140.1,orf19.3139	0.339	1.053	0.696
Cal117940W	orf19.5063	0.302	1.089	0.6955
Cal503290W	orf19.4144	0.538	0.853	0.6955
Cal607990C	orf19.5724	0.335	1.056	0.6955
Cal215750W	orf19.2256	0.357	1.032	0.6945
Cal402840W	orf19.4660	0.175	1.213	0.694
Cal706960W	orf19.5136,orf19.5134	0.313	1.075	0.694
Cal121870W	orf19.4821	0.355	1.032	0.6935
Cal213100W	orf19.5205	0.339	1.048	0.6935
Cal403290W	orf19.4639:orf19.4637	0.295	1.092	0.6935
Cal601670W	orf19.3642	0.436	0.951	0.6935
CalR08910W	orf19.470	0.513	0.874	0.6935
Cal204030W	orf19.1497	0.347	1.038	0.6925
Cal315670W	orf19.7459	0.117	1.268	0.6925
Cal708190C	orf19.5504	0.346	1.039	0.6925
CalR17690C	orf19.3711	0.338	1.046	0.692
Cal311780W	orf19.5992	0.265	1.119	0.692
CalR16500C	orf19.6136	0.394	0.989	0.6915
Cal112070W	orf19.431,orf19.430	0.253	1.129	0.691
Cal207810W	orf19.874	0.276	1.106	0.691
Cal312250C	orf19.6972	0.239	1.143	0.691
Cal702170W	orf19.7015	0.369	1.012	0.6905
CalR01200W	orf19.7486	0.386	0.995	0.6905
Cal111640W	orf19.450	0.303	1.077	0.69
Cal305450C	orf19.1613	0.378	1.001	0.6895
Cal415100W	orf19.3133	0.434	0.945	0.6895
Cal301490C	orf19.5390	0.492	0.886	0.689
Cal701320W	orf19.7053	0.305	1.073	0.689
Cal306820W	orf19.287	0.432	0.945	0.6885
Cal307700W	orf19.333	0.39	0.987	0.6885
Cal106550W	orf19.2983	0.356	1.02	0.688
Cal215200C	orf19.2227	0.325	1.051	0.688
Cal502260W	orf19.1969	0.339	1.037	0.688
Cal505480W	orf19.4263	0.271	1.105	0.688
Cal114200W	snR5b	0.328	1.047	0.6875
Cal125430C	orf19.2310.1	0.225	1.15	0.6875
CalR01940W	orf19.3272,orf19.3271	0.361	1.014	0.6875
Cal129180W	orf19.6348	0.312	1.062	0.687
Cal306540C	orf19.272	0.371	1.003	0.687
CalR05220W	orf19.3735	1.059	0.315	0.687
Cal301560W	orf19.5384	0.333	1.04	0.6865
Cal312190W	orf19.6968	0.252	1.12	0.686
Cal510680W	orf19.3964	0.445	0.927	0.686
CalR21740W	orf19.6590	0.276	1.096	0.686
Cal118190C	orf19.5073	0.212	1.16	0.686
Cal300740W	orf19.5432	0.389	0.983	0.686
CalR07520C	orf19.2385	0.359	1.012	0.6855
Cal506940C	orf19.4347	0.361	1.009	0.685
Cal102820W	orf19.3321	0.425	0.944	0.6845
Cal210260W	orf19.4495	0.413	0.956	0.6845
Cal211280C	orf19.3530	0.292	1.077	0.6845
Cal219660C	orf19.3600	0.38	0.989	0.6845
Cal510990W	orf19.3982	0.358	1.011	0.6845
Cal302630W	orf19.3154	0.348	1.02	0.684
Cal415210C	orf19.3129	0.364	1.004	0.684
Cal200160W	orf19.1917	0.229	1.138	0.6835
Cal219440W	orf19.3611	0.4	0.967	0.6835
Cal400560C	orf19.5654	0.34	1.027	0.6835
Cal703440W	orf19.6565	0.404	0.963	0.6835
Cal410990W	orf19.3793	0.267	1.099	0.683
Cal220860W	orf19.4088	0.363	1.003	0.683
Cal505450C	orf19.4262	0.402	0.963	0.6825
Cal604760W	orf19.3455:orf19.3456	0.221	1.144	0.6825
Cal701430W	orf19.7048.1	0.392	0.973	0.6825
Cal701960C	orf19.7023	0.395	0.97	0.6825
Cal120620W	orf19.4765	0.075	1.289	0.682
Cal100160W	orf19.6109	0.362	1.001	0.6815
Cal217060C	orf19.1864	0.336	1.027	0.6815
Cal306020C	orf19.247	0.398	0.964	0.681
Cal703830W	orf19.6544	0.244	1.118	0.681
CalR02350W	orf19.3255	0.326	1.036	0.681
CalR08150W	orf19.4380.1,orf19.4361	0.278	1.084	0.681
CalR08590W	orf19.4377	0.391	0.971	0.681
Cal131570W	orf19.5014	0.285	1.077	0.681
Cal310290W	orf19.5908	0.345	1.017	0.681
Cal203910C	orf19.1491	0.282	1.079	0.6805
Cal700700C	orf19.7088	0.401	0.96	0.6805
CalR23150C	orf19.7617	0.33	1.031	0.6805
CalR22810W	orf19.7599	0.346	1.015	0.6805
Cal103390C	orf19.3347	0.296	1.064	0.68
Cal110430C	orf19.783	0.272	1.088	0.68
Cal606850C	orf19.5589	0.282	1.078	0.68
Cal112910W	orf19.2476	0.522	0.838	0.68
Cal204200W	orf19.1508	0.284	1.075	0.6795
Cal210250C	orf19.4495	0.295	1.064	0.6795
CalR01220W	orf19.7485	0.346	1.013	0.6795
Cal213300W	orf19.5213	0.365	0.993	0.679
Cal213950C	orf19.5486.1	0.325	1.033	0.679
Cal302700C	orf19.1730	0.317	1.041	0.679
Cal214150W	orf19.5498	0.104	1.253	0.6785
Cal202460C	orf19.2006	0.344	1.013	0.6785
CalR14920W	orf19.701	0.356	1.001	0.6785
Cal212370W	orf19.3579	0.318	1.038	0.678
Cal707950W	orf19.6692	0.336	1.02	0.678
CalR04310C	orf19.2597	0.332	1.024	0.678
Cal129030C	orf19.6354	0.366	0.99	0.678
Cal205170W	orf19.1555	0.422	0.933	0.6775
Cal705860W	orf19.3696	0.366	0.989	0.6775
Cal106840C	orf19.2998	0.388	0.966	0.677
Cal707240W	orf19.1345	0.505	0.849	0.677
CalR13510W	orf19.3856	0.337	1.017	0.677
Cal115420W	orf19.6227	0.331	1.022	0.6765
Cal204080C	orf19.1500	0.391	0.962	0.6765
Cal313100W	orf19.7347	0.374	0.979	0.6765
Cal218790C	orf19.1434	0.372	0.98	0.676
Cal306490C	orf19.270	0.311	1.041	0.676
Cal313300W	orf19.7357	0.307	1.044	0.6755
Cal316670W	orf19.6788	0.356	0.995	0.6755
Cal407690W	orf19.3373	0.36	0.991	0.6755
Cal600220W	orf19.6328	0.372	0.979	0.6755
CalR21560C	orf19.6597	0.332	1.019	0.6755
CalR22020W	orf19.7557:orf19.7558	0.266	1.085	0.6755
Cal112970C	orf19.2474:orf19.2473	0.312	1.038	0.675
Cal130400W	orf19.4953	0.304	1.046	0.675
Cal210660C	orf19.156	0.292	1.058	0.675
Cal305360C	orf19.1617	0.384	0.966	0.675
Cal305380W	orf19.1616	0.617	0.733	0.675
Cal703180W	orf19.6580	0.356	0.994	0.675
Cal130690W	orf19.4966	0.253	1.096	0.6745
Cal702890W	orf19.6919	0.229	1.12	0.6745
Cal222200W	orf19.1363	0.339	1.01	0.6745
Cal506090C	orf19.4299	0.338	1.011	0.6745
Cal103770C	orf19.4551	0.341	1.007	0.674
Cal311560W	orf19.5976	0.259	1.089	0.674
Cal202440C	orf19.2007:orf19.2006.1	0.237	1.11	0.6735
Cal310830W	orf19.5938	0.375	0.972	0.6735
Cal708140W	orf19.5507	0.34	1.006	0.673
Cal115110C	orf19.6242	0.351	0.994	0.6725
Cal122050W	orf19.4828	0.358	0.987	0.6725
Cal127460W	orf19.5274	0.38	0.965	0.6725
CalR21750C	orf19.6589	0.342	1.003	0.6725
Cal121950C	orf19.4824	0.311	1.033	0.672
Cal406830W	orf19.2685	0.285	1.059	0.672
Cal706270W	orf19.5170	0.377	0.967	0.672
CalR10290W	orf19.551	0.349	0.995	0.672
Cal105180W	tR(CCG)1:orf19.3691	0.297	1.046	0.6715
Cal502570C	snR69:orf19.1955	0.301	1.042	0.6715
Cal222150W	orf19.1365,orf19.1364	0.259	1.083	0.671
Cal606270W	orf19.5557	0.278	1.064	0.671
Cal609290W	orf19.77.1	0.453	0.889	0.671
Cal224010W	orf19.5351	0.255	1.086	0.6705
Cal116860W	orf19.4426	0.33	1.011	0.6705
Cal502300C	orf19.1967	0.392	0.949	0.6705
Cal123260W	orf19.4884	0.243	1.096	0.6695
Cal408650C	orf19.5041	0.285	1.054	0.6695
Cal506230C	orf19.4308	0.368	0.971	0.6695
Cal503520C	orf19.4153	0.669	0.669	0.669
Cal400450W	orf19.5646	0.248	1.09	0.669
CalR20410C	orf19.7308	0.195	1.143	0.669
Cal508740W	orf19.3216	0.285	1.053	0.669
Cal103690W	orf19.3359	0.275	1.062	0.6685
Cal223120C	orf19.1755	0.401	0.936	0.6685
Cal402110W	orf19.4698	0.352	0.985	0.6685
Cal608210W	orf19.5735	0.353	0.984	0.6685
Cal405590C	orf19.2752	0.334	1.002	0.668
Cal506970C	orf19.4348	0.434	0.902	0.668
Cal202900W	orf19.1989	0.38	0.955	0.6675
Cal213290C	orf19.5213	0.309	1.026	0.6675
Cal304990C	orf19.1631	0.307	1.028	0.6675
Cal506990C	orf19.4349	0.206	1.129	0.6675
Cal608630W	orf19.5759	0.256	1.079	0.6675
Cal103520W	orf19.3353	0.358	0.976	0.667
Cal108780C	orf19.4465	0.322	1.012	0.667
Cal207940W	orf19.867	0.347	0.987	0.667
Cal212660C	orf19.6874	0.351	0.983	0.667
Cal610380W	orf19.2163	0.341	0.993	0.667
Cal300260W	orf19.5461:orf19.5463,orf19.5462	0.279	1.054	0.6665
Cal407680C	orf19.3373	-0.089	1.421	0.666
CalR14690C	orf19.695	0.32	1.012	0.666
Cal306560W	orf19.272	0.351	0.981	0.666
Cal406680W	orf19.2691	0.361	0.971	0.666
Cal101320C	orf19.6041	0.338	0.993	0.6655
Cal104950W	orf19.3681	0.245	1.086	0.6655
Cal127200C	orf19.1136	0.324	1.007	0.6655
Cal606970W	orf19.5597	0.305	1.026	0.6655
CalR17570W	orf19.3706	0.322	1.009	0.6655
Cal127370C	orf19.5279	0.29	1.04	0.665
Cal219250W	orf19.3621	0.311	1.018	0.6645
Cal508710W	orf19.3218	0.495	0.834	0.6645
Cal602060W	orf19.96	0.35	0.979	0.6645
Cal115930W	orf19.6200	0.138	1.19	0.664
Cal415940W	orf19.3087.2	0.323	1.005	0.664
Cal501180C	orf19.935	0.319	1.009	0.664
Cal511040C	orf19.3984	0.374	0.954	0.664
Cal406300C	orf19.2712	0.38	0.947	0.6635
Cal511310W	orf19.4000	0.232	1.095	0.6635
Cal125570W	orf19.2306	0.275	1.051	0.663
Cal206440W	orf19.5814.1	0.403	0.922	0.6625
Cal115370W	orf19.6229	0.363	0.962	0.6625
Cal207550C	orf19.893	0.359	0.966	0.6625
Cal317770W	orf19.6727	0.415	0.91	0.6625
Cal113360C	orf19.2452	0.358	0.966	0.662
Cal511780W	orf19.4026	0.363	0.961	0.662
CalR15750W	orf19.2361	0.344	0.98	0.662
Cal108670W	orf19.4459	0.279	1.044	0.6615
Cal507550W	orf19.2638.1	0.168	1.155	0.6615
Cal604720C	orf19.3494	0.351	0.971	0.661
CalR19350C	orf19.6438	0.379	0.943	0.661
Cal507230W	orf19.2650	0.277	1.044	0.6605
CalR11590W	orf19.640	0.344	0.977	0.6605
CalR23160W	orf19.7617	0.171	1.15	0.6605
Cal304430C	orf19.1656	0.268	1.052	0.66
Cal407260C	orf19.2665	0.421	0.899	0.66
Cal101810C	orf19.6022	0.357	0.963	0.66
Cal702630W	orf19.6905,orf19.6906	0.192	1.128	0.66
Cal508540C	orf19.1106	0.626	0.693	0.6595
Cal706020W	orf19.5180	0.224	1.095	0.6595
Cal114260W	orf19.177	0.706	0.612	0.659
Cal315820W	orf19.6828	0.31	1.008	0.659
CalR01070W	orf19.7490	0.247	1.071	0.659
Cal219020C	orf19.3629	0.427	0.89	0.6585
Cal316410C	orf19.6798	0.242	1.075	0.6585
Cal702580C	orf19.6903	0.338	0.978	0.658
Cal224190C	orf19.5365	0.26	1.055	0.6575
Cal500330W	orf19.5681	0.344	0.971	0.6575
CalR15550W	orf19.2370	0.943	0.372	0.6575
Cal317730W	orf19.6730	0.402	0.912	0.657
Cal507460C	orf19.2639	0.306	1.008	0.657
Cal609080W	orf19.1212	0.369	0.945	0.657
CalR03330W	tL(UAA)2	0.332	0.982	0.657
Cal306640C	orf19.276	0.356	0.957	0.6565
Cal608510C	orf19.5754	0.271	1.041	0.656
Cal221490W	orf19.1397	-0.7	2.011	0.6555
Cal511350C	orf19.4002	0.313	0.998	0.6555
Cal117630W	orf19.4712,orf19.3490	0.214	1.096	0.655
Cal123940W	orf19.4910	0.395	0.915	0.655
Cal304240C	orf19.1664	0.284	1.026	0.655
Cal409940W	orf19.3846	0.404	0.906	0.655
Cal303850C	orf19.1676	0.306	1.003	0.6545
Cal406080C	orf19.2727	0.274	1.035	0.6545
Cal700470W	orf19.7102	0.349	0.96	0.6545
Cal510530C	orf19.3957	0.294	1.014	0.654
Cal708580W	orf19.7188	0.282	1.026	0.654
CalR20810C	orf19.7327	0.373	0.934	0.6535
Cal411870W	orf19.2631	0.366	0.94	0.653
Cal312510W	orf19.6982	0.144	1.162	0.653
Cal103900W	orf19.4545	0.246	1.059	0.6525
Cal124500W	orf19.1832	0.262	1.043	0.6525
Cal110950C	orf19.757.1	0.319	0.985	0.652
Cal218580W	orf19.1354	0.316	0.988	0.652
Cal403190W	orf19.4645	0.208	1.096	0.652
Cal412760C	orf19.1253	0.106	1.198	0.652
Cal600910W	orf19.4213	0.438	0.866	0.652
Cal709380W	orf19.7130	0.277	1.027	0.652
Cal118300W	orf19.5077	0.354	0.949	0.6515
Cal131010W	orf19.4984	0.257	1.046	0.6515
Cal503780C	orf19.3204	0.307	0.996	0.6515
Cal705590C	orf19.6456	0.308	0.995	0.6515
Cal605760C	orf19.5531	0.239	1.063	0.651
Cal401980C	orf19.4703	0.394	0.907	0.6505
Cal200430W	orf19.2111.2	0.26	1.04	0.65
Cal404320W	orf19.4596:orf19.4595	0.281	1.019	0.65
Cal602970C	orf19.3446	0.275	1.025	0.65
CalR13590C	orf19.3861	0.346	0.954	0.65
Cal104130W	orf19.4535	0.336	0.963	0.6495
Cal113500W	orf19.2446,orf19.2445	0.437	0.862	0.6495
CalR06440W	orf19.2844	0.226	1.073	0.6495
Cal105750C	orf19.2947	0.275	1.023	0.649
Cal205970W	orf19.5833	0.309	0.989	0.649
Cal404100W	orf19.4607	0.274	1.024	0.649
Cal310820C	orf19.5938	0.241	1.056	0.6485
Cal118150W	orf19.5070	0.41	0.886	0.648
Cal210880C	orf19.182	0.325	0.971	0.648
Cal703100W	orf19.6584	0.611	0.685	0.648
CalR21570W	orf19.6597	0.284	1.012	0.648
Cal502280W	orf19.1968.1:snR32a,snR32a	0.351	0.945	0.648
Cal509870W	orf19.3926	0.257	1.039	0.648
Cal101870W	orf19.6020	0.352	0.943	0.6475
Cal601520W	orf19.3649	0.293	1.002	0.6475
Cal609310W	orf19.76	0.357	0.938	0.6475
Cal211520C	orf19.3541	0.302	0.992	0.647
CalR17340W	orf19.6282	0.139	1.155	0.647
Cal408610C	orf19.5039	0.283	1.011	0.647
Cal102090W	orf19.6010	0.271	1.022	0.6465
Cal304920C	orf19.1634	0.271	1.022	0.6465
Cal112870C	orf19.2478	0.334	0.959	0.6465
Cal130640C	orf19.4964	0.812	0.48	0.646
Cal411380W	orf19.3774,orf19.3773	0.258	1.034	0.646
Cal111670W	orf19.449	0.315	0.976	0.6455
Cal120900W	orf19.4776	0.249	1.042	0.6455
Cal131890W	tA(AGC)7	0.319	0.972	0.6455
Cal214650W	snR8b	0.372	0.919	0.6455
Cal313250W	orf19.7355	0.262	1.029	0.6455
Cal415930W	orf19.3087.2	0.307	0.984	0.6455
Cal307010C	orf19.301	0.321	0.969	0.645
Cal132260W	orf19.7215	0.261	1.028	0.6445
Cal211890W	orf19.3557	0.387	0.902	0.6445
Cal506890W	orf19.4342	0.522	0.767	0.6445
Cal117670W	orf19.4713	0.456	0.833	0.6445
Cal307080C	orf19.304	0.18	1.109	0.6445
Cal218000W	orf19.2178.1	0.28	1.008	0.644
Cal307710C	orf19.333	0.332	0.956	0.644
Cal401230C	orf19.4187	0.311	0.977	0.644
Cal403050W	orf19.4651	0.36	0.928	0.644
Cal415900W	orf19.3089	0.202	1.086	0.644
CalR22900C	orf19.7604	0.27	1.018	0.644
Cal131180W	orf19.4996	0.213	1.074	0.6435
Cal110650W	orf19.773,orf19.772.1	0.274	1.013	0.6435
Cal132930C	orf19.7254	0.176	1.111	0.6435
Cal209290C	orf19.808	0.253	1.034	0.6435
Cal408640W	orf19.5040	0.359	0.928	0.6435
Cal504050W	orf19.3190	0.432	0.855	0.6435
CalR01240W	SNRNAU5	0.246	1.041	0.6435
Cal120660W	orf19.4766,orf19.4767	0.281	1.005	0.643
Cal127390C	orf19.5278	0.254	1.032	0.643
CalR06470W	orf19.2846	0.324	0.962	0.643
CalR05380C	orf19.3727	0.209	1.076	0.6425
CalR23030C	orf19.7610	0.233	1.052	0.6425
Cal104630W	orf19.3667	0.29	0.995	0.6425
Cal108610C	orf19.1026	0.319	0.966	0.6425
Cal204310C	orf19.1513,orf19.1514	0.33	0.955	0.6425
Cal223920W	orf19.5343	0.188	1.097	0.6425
Cal510890C	orf19.3977	0.282	1.003	0.6425
Cal101230W	orf19.6047	0.217	1.067	0.642
Cal108710W	orf19.4461	0.192	1.092	0.642
Cal218780W	orf19.1435	0.289	0.995	0.642
Cal406600W	orf19.2695,orf19.2694	0.442	0.842	0.642
Cal409400W	orf19.5292	0.34	0.944	0.642
Cal708330C	orf19.7202	0.334	0.95	0.642
Cal300220W	orf19.5465	0.362	0.921	0.6415
Cal103530W	orf19.3354	0.36	0.922	0.641
Cal210730W	orf19.193,orf19.192	0.283	0.999	0.641
Cal300830C	orf19.5426	0.247	1.035	0.641
Cal311520C	orf19.5975	0.332	0.95	0.641
Cal315680W	orf19.7459	0.328	0.954	0.641
Cal404710W	orf19.4578	0.31	0.972	0.641
Cal223010W	orf19.1760	0.513	0.768	0.6405
Cal508990C	orf19.1285	0.395	0.886	0.6405
Cal202130C	orf19.2020	0.29	0.99	0.64
Cal210140W	orf19.4502	0.164	1.116	0.64
Cal307060W	orf19.302	0.325	0.955	0.64
Cal309300C	orf19.913.2	0.31	0.97	0.64
Cal413350C	orf19.4405	0.307	0.973	0.64
Cal704180W	orf19.6527	0.284	0.996	0.64
Cal123440C	orf19.4890	0.283	0.996	0.6395
Cal220650C	orf19.4077	0.41	0.869	0.6395
Cal601270W	orf19.4195.1	0.375	0.904	0.6395
Cal201490W	orf19.2054	0.344	0.934	0.639
Cal205010C	orf19.1545	0.344	0.934	0.639
Cal211150W	orf19.3523	0.273	1.005	0.639
Cal414120C	orf19.2901	0.269	1.009	0.639
Cal504280C	orf19.3176	0.38	0.898	0.639
Cal705150C	orf19.6476	0.313	0.965	0.639
CalR09400W	orf19.501	0.313	0.965	0.639
Cal500970C	orf19.943	0.213	1.064	0.6385
Cal102480W	orf19.3302	0.162	1.115	0.6385
Cal210170C	orf19.4499	0.011	1.266	0.6385
Cal607980W	orf19.5723	0.324	0.953	0.6385
Cal500710W	orf19.954	0.321	0.955	0.638
Cal104560C	orf19.3664	0.309	0.966	0.6375
Cal118800C	orf19.5106	0.245	1.03	0.6375
Cal202500W	orf19.2005	0.412	0.863	0.6375
Cal208720W	orf19.837	0.296	0.979	0.6375
Cal219230W	orf19.3621	0.328	0.947	0.6375
Cal500840W	orf19.951	0.233	1.041	0.637
Cal115310C	orf19.6232	0.286	0.987	0.6365
Cal200230W	orf19.1911:orf19.1910	0.316	0.957	0.6365
Cal222990W	orf19.1761	0.266	1.007	0.6365
Cal400460C	orf19.5647	0.242	1.031	0.6365
Cal707630W	orf19.6705	0.441	0.832	0.6365
Cal303030C	orf19.1717	0.086	1.186	0.636
Cal414400W	orf19.2888,orf19.2887	0.248	1.024	0.636
Cal609770C	orf19.1093	0.277	0.995	0.636
CalR05920C	orf19.2823	0.224	1.048	0.636
Cal706930C	orf19.5136	-0.001	1.272	0.6355
Cal303740W	orf19.1682	0.295	0.976	0.6355
Cal305930C	orf19.242.2	0.326	0.945	0.6355
CalR02960C	orf19.3225	0.268	1.003	0.6355
Cal503310W	orf19.4145	0.332	0.938	0.635
Cal215610C	orf19.2249	0.231	1.038	0.6345
Cal122790C	orf19.4864	0.292	0.977	0.6345
Cal125100W	orf19.2328	0.33	0.939	0.6345
Cal210970W	orf19.4127	0.398	0.87	0.634
CalR19380W	orf19.6440:orf19.6442	0.465	0.802	0.6335
Cal125840C	orf19.677	0.272	0.995	0.6335
CalR06410W	orf19.2843	0.304	0.963	0.6335
CalR11410C	orf19.646	0.42	0.847	0.6335
CalR17900W	orf19.610	0.308	0.959	0.6335
Cal204610C	orf19.1529	0.37	0.896	0.633
Cal317940W	orf19.6713	0.428	0.838	0.633
Cal502910W	orf19.1939,orf19.1938	0.263	1.003	0.633
Cal503050W	orf19.1930	0.251	1.014	0.6325
Cal205810C	orf19.5842	0.131	1.134	0.6325
Cal313180C	orf19.7353	0.222	1.043	0.6325
Cal201470W	orf19.2055	0.264	1	0.632
Cal212570W	snR56	0.274	0.99	0.632
Cal216870C	orf19.1876	0.316	0.948	0.632
Cal224140C	orf19.5363	0.422	0.842	0.632
Cal300730C	orf19.5432	0.346	0.918	0.632
Cal602420W	orf19.118	0.297	0.967	0.632
Cal700060C	orf19.7121	0.254	1.01	0.632
CalR13100W	tS(AGA)3	0.203	1.061	0.632
CalR23110W	orf19.7613	0.375	0.889	0.632
Cal207070C	orf19.5779	0.253	1.011	0.632
Cal108080W	orf19.3061	0.334	0.929	0.6315
Cal118010W	orf19.5065	0.309	0.954	0.6315
Cal606070W	orf19.5543:orf19.5544	0.35	0.913	0.6315
CalR02700C	orf19.3234.1	0.275	0.988	0.6315
Cal103590W	tS(UGA)1	0.371	0.891	0.631
Cal209370W	orf19.804.1	0.18	1.082	0.631
Cal219150W	orf19.3625	0.319	0.943	0.631
Cal302670C	orf19.3158	0.294	0.968	0.631
Cal507980W	orf19.6674	0.339	0.923	0.631
CalR05080W	orf19.3742,orf19.3740	0.296	0.966	0.631
Cal132280W	orf19.7215.3	0.293	0.968	0.6305
Cal101990W	orf19.6014	0.27	0.99	0.63
Cal503800C	orf19.3203	0.143	1.117	0.63
Cal604020C	orf19.3404	0.368	0.892	0.63
CalR01110W	orf19.7489	0.363	0.897	0.63
Cal101430W	orf19.6038,orf19.6037	0.247	1.013	0.63
Cal106010W	orf19.2959	0.264	0.995	0.6295
Cal303400W	orf19.1701:orf19.1700	0.214	1.045	0.6295
Cal203480W	orf19.1471	0.213	1.045	0.629
Cal204730C	orf19.1534	0.311	0.947	0.629
Cal209710W	orf19.4521	0.293	0.965	0.629
Cal213080C	orf19.5204	0.214	1.044	0.629
Cal304490C	tY(GUA)2,tY(GUA)3	0.21	1.047	0.6285
Cal108480W	orf19.1032	0.335	0.921	0.628
Cal109930C	orf19.5196	0.155	1.101	0.628
Cal316950W	orf19.6776	0.265	0.991	0.628
CalR18390C	orf19.6377	0.359	0.897	0.628
CalR23000C	orf19.7609	0.275	0.981	0.628
CalR07110C	orf19.2407	0.341	0.914	0.6275
Cal113540W	orf19.2444	0.423	0.831	0.627
Cal121370W	orf19.4798	0.294	0.96	0.627
Cal309080W	orf19.2810	0.354	0.9	0.627
Cal507340W	orf19.2644	0.326	0.928	0.627
Cal318340C	orf19.6190	0.276	0.977	0.6265
Cal504800C	orf19.4225.1:orf19.4227	0.342	0.911	0.6265
Cal700270W	orf19.7110	0.322	0.931	0.6265
Cal701060W	orf19.7070	0.259	0.994	0.6265
Cal702830W	orf19.6915	0.264	0.989	0.6265
Cal705170W	orf19.6476	0.362	0.891	0.6265
Cal216970W	orf19.1868	0.304	0.949	0.6265
CalR07150C	SNRNAU1	0.16	1.093	0.6265
Cal214900W	orf19.1296:orf19.81	0.279	0.973	0.626
Cal217860C	orf19.2183	0.198	1.054	0.626
Cal701920W	orf19.7027	0.411	0.841	0.626
Cal104980C	orf19.3682	0.314	0.937	0.6255
Cal112570W	tN(GUU)1	0.419	0.832	0.6255
Cal117520C	orf19.1229	0.306	0.945	0.6255
Cal223670W	orf19.5326	0.235	1.016	0.6255
CalR03520C	orf19.2541	0.254	0.997	0.6255
Cal130260W	orf19.4950	0.248	1.002	0.625
CalR09060C	orf19.481	0.286	0.964	0.625
Cal101640C	orf19.6029	0.355	0.894	0.6245
Cal412650W	orf19.1248	0.295	0.954	0.6245
Cal214690W	orf19.33	0.331	0.916	0.6235
Cal501580W	orf19.568	0.231	1.016	0.6235
Cal204580C	orf19.1527	0.301	0.946	0.6235
Cal100480W	orf19.6081	0.252	0.994	0.623
Cal608600W	orf19.5758	0.264	0.982	0.623
Cal104930W	orf19.3680	0.618	0.627	0.6225
CalR21520C	orf19.6599.1	0.318	0.927	0.6225
CalR02480C	orf19.3248	0.427	0.818	0.6225
Cal101150C	orf19.6054:orf19.6053	0.223	1.021	0.622
Cal112230W	orf19.422	0.309	0.935	0.622
Cal114370W	orf19.6274	0.218	1.026	0.622
Cal200110C	tV(CAC)1	0.25	0.994	0.622
Cal214750W	orf19.35	0.363	0.881	0.622
Cal406140C	orf19.2724	0.292	0.952	0.622
Cal706980W	orf19.5134	0.283	0.961	0.622
CalR01300W	orf19.7482	0.348	0.896	0.622
CalR23390C	orf19.7634	0.282	0.962	0.622
Cal116040W	orf19.6196	0.175	1.068	0.6215
Cal700790W	orf19.7084	0.145	1.098	0.6215
Cal113550W	orf19.2443	0.249	0.994	0.6215
Cal114300W	orf19.6276	0.372	0.871	0.6215
Cal304750C	orf19.1642	0.272	0.971	0.6215
Cal111390W	orf19.57,orf19.7276.1,orf19.7276.1,orf19.2261,orf19.2371:orf19.3701	0.307	0.935	0.621
Cal222270C	orf19.1360.1	0.309	0.933	0.621
Cal601110W	orf19.4204	0.227	1.015	0.621
Cal604830W	orf19.3459	0.306	0.936	0.621
Cal609610W	orf19.1084	0.174	1.068	0.621
Cal414780C	orf19.2870	0.309	0.932	0.6205
Cal607420C	orf19.5621	0.328	0.913	0.6205
Cal415310W	orf19.3125	0.228	1.013	0.6205
Cal509710W	orf19.3920	0.424	0.816	0.62
Cal607580W	orf19.5628	0.31	0.93	0.62
Cal406700W	tT(UGU)1	0.329	0.91	0.6195
Cal200500C	orf19.2108:orf19.2107.1	0.277	0.962	0.6195
CalR21480C	orf19.6600	0.291	0.948	0.6195
Cal101500C	orf19.6034	0.29	0.948	0.619
Cal606490W	orf19.5569	0.142	1.096	0.619
Cal706250C	orf19.5170	0.396	0.842	0.619
Cal113510C	orf19.2445	0.386	0.851	0.6185
Cal218250C	orf19.2169	0.262	0.975	0.6185
Cal413280W	orf19.1277	0.199	1.038	0.6185
Cal503730W	orf19.3207	0.28	0.957	0.6185
CalR05830C	orf19.2820	0.307	0.93	0.6185
Cal607320W	orf19.5615:orf19.5616	0.293	0.944	0.6185
Cal402470W	tD(GUC)6	0.195	1.041	0.618
Cal406240C	orf19.2717	0.301	0.935	0.618
CalR12540C	tC(GCA)2	0.032	1.204	0.618
Cal101240C	orf19.6046	0.313	0.922	0.6175
Cal224250W	orf19.5368	0.169	1.066	0.6175
Cal313790W	orf19.7376	0.238	0.997	0.6175
Cal317260W	orf19.6754	0.265	0.97	0.6175
Cal509930C	orf19.3931	0.411	0.824	0.6175
CalR00230C	orf19.7538	0.24	0.995	0.6175
Cal608760W	orf19.5765	0.23	1.004	0.617
Cal206980C	orf19.5784	0.306	0.927	0.6165
Cal209870W	orf19.4513	0.249	0.984	0.6165
Cal211790C	orf19.3554	0.267	0.966	0.6165
Cal213160C	orf19.5209	0.363	0.87	0.6165
Cal309680W	orf19.5867	0.245	0.988	0.6165
Cal310920C	orf19.5943.1	0.321	0.912	0.6165
Cal505330W	orf19.4253	0.348	0.885	0.6165
Cal707600W	orf19.6704,orf19.5508	0.33	0.903	0.6165
Cal708590C	orf19.7187	0.281	0.952	0.6165
Cal416060C	orf19.3077	0.224	1.008	0.616
CalR03160C	orf19.2520	0.296	0.936	0.616
Cal203980C	orf19.1495	0.337	0.894	0.6155
Cal317930W	orf19.6716	0.445	0.786	0.6155
Cal409910W	orf19.1409.3	0.245	0.986	0.6155
Cal101860W	orf19.6021	0.331	0.899	0.615
Cal221300W	orf19.1404	0.237	0.993	0.615
Cal708120W	orf19.5508	0.225	1.005	0.615
CalR10000W	orf19.537:orf19.538	0.273	0.957	0.615
Cal108490C	orf19.1031	0.399	0.83	0.6145
Cal117100W	orf19.2792	0.504	0.725	0.6145
Cal125530W	orf19.2308	0.277	0.952	0.6145
Cal209460W	orf19.799	0.232	0.997	0.6145
Cal604010W	tA(UGC)1,tA(UGC)2	0.293	0.936	0.6145
Cal508590W	orf19.1105.3:orf19.1105.2	0.208	1.021	0.6145
Cal213650W	orf19.4114	0.239	0.989	0.614
Cal315570W	orf19.7455	0.3	0.928	0.614
Cal318000W	orf19.6710	0.274	0.954	0.614
Cal318040W	orf19.6170	0.266	0.962	0.614
Cal412020W	orf19.1789.1	0.347	0.881	0.614
CalR13210W	orf19.6621	0.481	0.747	0.614
CalR13760C	orf19.3870	0.294	0.934	0.614
Cal608380C	orf19.5749	0.308	0.919	0.6135
Cal115660W	orf19.6219:orf19.6217	0.362	0.865	0.6135
Cal130000W	orf19.4936.1	0.26	0.967	0.6135
CalR07970C	orf19.4401	0.252	0.975	0.6135
Cal124130C	orf19.989	0.24	0.986	0.613
Cal305210C	orf19.1621	0.329	0.897	0.613
Cal314830C	orf19.7421	0.18	1.046	0.613
Cal702980C	orf19.6588	0.23	0.996	0.613
Cal704910C	orf19.6487	0.41	0.816	0.613
CalR12430W	orf19.5849	0.242	0.984	0.613
Cal222290W	orf19.1360	0.255	0.97	0.6125
CalR17790C	orf19.3715	0.384	0.841	0.6125
Cal102160C	orf19.3288	0.176	1.048	0.612
Cal208470C	orf19.847	0.334	0.89	0.612
Cal215640W	orf19.2250	0.264	0.96	0.612
Cal222740W	orf19.1770	0.285	0.939	0.612
Cal308280W	orf19.356	0.527	0.697	0.612
Cal707230W	orf19.1345	0.264	0.96	0.612
Cal317530W	snR52:tR(UCU)5	0.177	1.046	0.6115
Cal409900C	orf19.1409.3	0.362	0.861	0.6115
Cal602480W	orf19.121	0.262	0.961	0.6115
Cal123810W	orf19.4906	0.283	0.939	0.611
Cal309430W	orf19.5857	0.316	0.906	0.611
Cal501800W	orf19.581	0.063	1.159	0.611
Cal702150C	orf19.7016	0.356	0.866	0.611
Cal310990W	orf19.5949	0.264	0.957	0.6105
Cal705510W	orf19.6458.1	0.308	0.913	0.6105
CalR07510W	orf19.2386	0.341	0.88	0.6105
CalR08700W	orf19.4355	0.327	0.894	0.6105
CalR13700W	orf19.3867	0.303	0.918	0.6105
Cal120670W	orf19.4766,orf19.4767	0.182	1.038	0.61
Cal609020C	orf19.1217	0.223	0.997	0.61
CalR13530W	orf19.3856	0.252	0.968	0.61
Cal401160W	orf19.4189	0.287	0.932	0.6095
Cal409470C	orf19.5290	0.29	0.929	0.6095
Cal133220C	orf19.7271	0.183	1.035	0.609
[truncated: 12,444 more rows]
[truncated: 1 more columns]

## Sheet: Hog1-bound gene
		Normalized intensities
Probe ID	Orf19 ID	Replicat #1	Replicat #2	Average	Description
Cal211940W	CD39	1.011	1.643	1.327	C/D box small nucleolar RNA (snoRNA); encoded within the intron of orf19.3559
Cal605340W	LSU-C2809	2.386	3.013	2.6995	C/D box small nucleolar RNA (snoRNA)
Cal124410W	orf19.1005	0.886	1.26	1.073	Predicted ORF in Assemblies 19, 20 and 21; Uncharacterized [orf19.1005;orf19.1005;LPF10;orf19.8619;IPF19532.1;IPF18326.1;IPF15368.2;Contig4-1962_0003;orf6.5794;orf6.581;CA6182;orf19.1003;CaO19.1005]
Cal109150C	orf19.1039	0.99	1.494	1.242	Predicted ORF in Assemblies 19, 20 and 21; Uncharacterized [orf19.1039;orf19.1039;orf19.8641;IPF17890.1;IPF29595.1;Contig4-2664_0010;orf6.2318;CA1034;BET4.3f;BET4.exon2]
Cal109340C	orf19.1050	1.286	1.921	1.6035	Predicted ORF in Assemblies 19, 20 and 21; possibly spurious ORF (Annotation Working Group prediction); Uncharacterized [orf19.1050;orf19.1050;orf19.8652;IPF15638.2;IPF17051.3;Contig4-2647_0015;orf6.2006;orf6.2132;CA0841;CaO19.1050;IPF15638]
Cal109430C	orf19.1054	1.371	1.864	1.6175	Predicted ORF in Assemblies 19, 20 and 21; possibly spurious ORF (Annotation Working Group prediction); Uncharacterized [orf19.1054;orf19.1054;orf19.8656;IPF18853.1;IPF16097.3;Contig4-2647_0024;orf6.2010;orf6.4935;CA0843;CaO19.1054;IPF18853]
Cal109580W	orf19.1061,orf19.1853	0.53	1.485	1.0075	Putative histone H3; amphotericin B repressed; regulated by Efg1p; farnesol regulated; Uncharacterized [orf19.1061;orf19.1061;HHT2;HHT1;orf19.8663;IPF26271.1;IPF7053.2;Contig4-1791_0001;orf6.4928;orf6.5620;CA2861;CaO19.8663;CaO19.1061]
Cal109610C	orf19.1063	1.67	2.347	2.0085	Predicted ORF in Assemblies 19, 20 and 21; Uncharacterized [orf19.1063;orf19.1063;FMP44;orf19.8665;IPF26256.1;IPF7056.2;Contig4-1738_0001;orf6.4926;CA2859;CaO19.1063;CaO19.8665;IPF7056]
Cal109680W	orf19.1065	0.817	1.722	1.2695	HSP70 family chaperone; antigenic; role in sensitivity to, import of beta-defensin peptides; ATPase domain binds histatin 5; at surface of hyphae, but not yeast-form cells; farnesol-downregulated in biofilm; caspofungin repressed; Verified [orf19.1065;orf19.1065;SSA1;orf19.8667;HS72;IPF26247.1;IPF7060.2;Contig4-2688_0006;Contig4-2688_0009;orf6.4924;CA2857;CaO19.1065;CaO19.8667]
Cal609370W	orf19.1075	1.075	1.983	1.529	Predicted ORF in Assemblies 19, 20 and 21; possibly spurious ORF (Annotation Working Group prediction); Uncharacterized [orf19.1075;orf19.1075;IPF18831.2;IPF19160.1;Contig4-1626_0009;orf6.735;CA0167;CaO19.1075;IPF19160]
Cal508620C	orf19.1105	1.074	1.875	1.4745	Predicted ORF in Assemblies 19, 20 and 21; possibly spurious ORF (Annotation Working Group prediction); Uncharacterized [orf19.1105;orf19.1105;orf19.8701;IPF26202.1;IPF15959.2;Contig4-2815_0001;orf6.753;CA0170;CaO19.1105;CaO19.8701;IPF15959]
Cal508630W	orf19.1105	0.875	1.804	1.3395	Predicted ORF in Assemblies 19, 20 and 21; possibly spurious ORF (Annotation Working Group prediction); Uncharacterized [orf19.1105;orf19.1105;orf19.8701;IPF26202.1;IPF15959.2;Contig4-2815_0001;orf6.753;CA0170;CaO19.1105;CaO19.8701;IPF15959]
Cal602310C	orf19.113	0.481	1.555	1.018	Protein with slight similarity to plant isoflavone reductase; transcription induced by cadmium (specifically, not by other heavy metals or heat shock), yeast-hyphal switch, oxidative stress (via Cap1p), or macrophage interaction; Verified [orf19.113;orf19.113;COR33;orf19.7761;IPF11929.2;IPF14967.2;Contig4-2149_0001;Contig4-2501_0003;orf6.1181;orf6.2562;CA1190;CaO19.113]
Cal127100W	orf19.1140	1.227	1.08	1.1535	Predicted ORF in Assemblies 19, 20 and 21; possibly spurious ORF (Annotation Working Group prediction); Uncharacterized [orf19.1140;orf19.1140;orf19.8733;IPF17749.2;IPF13160.2;Contig4-2171_0003;orf6.2176;CA0955;CaO19.1140;IPF13160]
Cal126820C	orf19.1152	0.968	1.174	1.071	Predicted ORF in Assemblies 19, 20 and 21; regulated by Gcn2p and Gcn4p; induced in core stress response; Uncharacterized [orf19.1152;orf19.1152;orf19.8744;IPF11713.1;IPF29561.1;IPF19733.2;Contig4-2773_0002;orf6.2780;orf6.3127;CA1330;CA6184;orf19.1151;CaO19.1152;IPF11713.5f]
Cal126510C	orf19.1168	0.712	1.29	1.001	Predicted zinc-finger protein of unknown function; Uncharacterized [orf19.1168;orf19.1168;orf19.8761;IPF7629.2;Contig4-2602_0009;orf6.3441;CA1786;CaO19.1168;CaO19.8761;IPF7629]
Cal600730C	orf19.1199	0.644	1.451	1.0475	Protein similar to S. cerevisiae Nop5p protein of small nucleolar ribonucleoprotein complex; transposon mutation affects filamentous growth; macrophage/pseudohyphal-induced; Verified [orf19.1199;orf19.1199;NOP58;orf19.8790;IPF18691.2;IPF7161.1;Contig4-3055_0011;Contig4-3055_0012;orf6.2852;orf6.2946;CA1438;CaO19.1199]
Cal602460C	orf19.121	2.682	0.134	1.408	Predicted ORF in Assemblies 19, 20 and 21; mutation confers hypersensitivity to cytochalasin D; Verified [orf19.121;orf19.121;orf19.7768;IPF27178.1;IPF13905.2;Contig4-2238_0008;orf6.406;CA0068;CaO19.121;CaO19.7768]
Cal609040C	orf19.1215	1.267	1.877	1.572	Predicted ORF in Assemblies 19, 20 and 21; Uncharacterized [orf19.1215;orf19.1215;orf19.8803;IPF9510.2;IPF29538.1;Contig4-2370_0003;Contig4-2370_0004;orf6.3082;CA1533;CaO19.8803;CaO19.1215;IPF9510]
Cal609050W	orf19.1215,orf19.1214	1.036	1.815	1.4255	Predicted ORF in Assemblies 19, 20 and 21; Uncharacterized [orf19.1215;orf19.1215;orf19.8803;IPF9510.2;IPF29538.1;Contig4-2370_0003;Contig4-2370_0004;orf6.3082;CA1533;CaO19.8803;CaO19.1215;IPF9510]:: Ortholog of C. dubliniensis CD36 : Cd36_64550, Candida tropicalis MYA-3404 : CTRG_02747 and Candida albicans WO-1 : CAWG_04972
Cal602520W	orf19.123	0.964	2.193	1.5785	Predicted ORF in Assemblies 19, 20 and 21; possibly spurious ORF (Annotation Working Group prediction); Uncharacterized [orf19.123;orf19.123;RCN1;orf19.7770;IPF13909.1;IPF7047.3;Contig4-2238_0001;Contig4-2900_0028;orf6.138;orf6.2608;CA1217;CaO19.123;IPF13909]
Cal602560W	orf19.124	1.872	2.636	2.254	Predicted ORF in Assemblies 19, 20 and 21; Uncharacterized [orf19.124;orf19.124;orf19.7771;IPF27169.1;IPF7046.2;Contig4-2900_0027;orf6.137;orf6.2607;CA0020;CaO19.124;IPF7046]
Cal508960W	orf19.1287	0.62	2.832	1.726	Predicted ORF in Assemblies 19, 20 and 21; possibly spurious ORF (Annotation Working Group prediction); Uncharacterized [orf19.1287;orf19.1287;orf19.8874;IPF26046.1;IPF10595.1;orf6.4238;CA2362;CaO19.8874;CaO19.1287;IPF10595]
Cal508950W	orf19.1287	1.121	2.016	1.5685	Predicted ORF in Assemblies 19, 20 and 21; possibly spurious ORF (Annotation Working Group prediction); Uncharacterized [orf19.1287;orf19.1287;orf19.8874;IPF26046.1;IPF10595.1;orf6.4238;CA2362;CaO19.8874;CaO19.1287;IPF10595]
Cal602600C	orf19.130	0.827	1.327	1.077	Predicted ORF in Assemblies 19, 20 and 21; Uncharacterized [orf19.130;orf19.130;orf19.7773;orf19.7775;orf19.7776;IPF7041.2;IPF27168.1;IPF7035.2;IPF19493.2;IPF29955.1;IPF7038.2;IPF29948.1;Contig4-2900_0020;Contig4-2900_0021;Contig4-2900_0023;orf6.10;orf6.2603;orf6.2602;orf6.2605;CA1215;CA1214;CA1213;orf19.126;orf19.127;orf19.129;VPS15.5f]
Cal408450W	orf19.1301	1.067	1.487	1.277	Predicted ORF in Assemblies 19, 20 and 21; Uncharacterized [orf19.1301;orf19.1301;orf19.8881;IPF13554.1;IPF18704.2;Contig4-2781_0016;orf6.1386;CA0452;CaO19.1301;IPF13554]
Cal408400W	orf19.1304	1.64	2.229	1.9345	Predicted ORF in Assemblies 19, 20 and 21; Uncharacterized [orf19.1304;orf19.1304;RRP4;orf19.8884;IPF6681.3;IPF6682.2;Contig4-2781_0003;orf6.2776;CA1328;CaO19.8884;CaO19.1304]
Cal707480W	orf19.1334	0.858	1.272	1.065	Predicted ORF in Assemblies 19, 20 and 21; possibly spurious ORF (Annotation Working Group prediction); transcription is repressed in response to alpha pheromone in SpiderM medium; Uncharacterized [orf19.1334;orf19.1334;orf19.8914;IPF25991.1;IPF8024.2;Contig4-3068_0019;orf6.3887;CA2118;CaJ7.0393;CaO19.8914;CaO19.1334;CaJ7_0393;CaO19_1334;IPF8024]
Cal218650W	orf19.1350	0.888	1.774	1.331	Predicted ORF in Assemblies 19, 20 and 21; Uncharacterized [orf19.1350;orf19.1350;orf19.8930;IPF19616.2;IPF19617.1;Contig4-3000_0026;orf6.1214;orf6.979;CA0249;CaO19.1350;IPF19617]
Cal222320W	orf19.1358	1.892	2.982	2.437	Transcriptional activator of general amino acid control response; required for Efg1p-dependent pseudohyphal filament induction by amino acid starvation but not by serum; upregulated in the presence of human whole blood or PMN cells; Verified [orf19.1358;orf19.1358;orf19.8938;IPF25958.1;IPF8919.2;Contig4-1860_0002;orf6.5290;CA3126;CaO19.1358;CaO19.8938]
Cal222340W	orf19.1358	0.806	1.722	1.264	Transcriptional activator of general amino acid control response; required for Efg1p-dependent pseudohyphal filament induction by amino acid starvation but not by serum; upregulated in the presence of human whole blood or PMN cells; Verified [orf19.1358;orf19.1358;orf19.8938;IPF25958.1;IPF8919.2;Contig4-1860_0002;orf6.5290;CA3126;CaO19.1358;CaO19.8938]
Cal221690W	orf19.1389	1.338	2.215	1.7765	Predicted ORF in Assemblies 19, 20 and 21; Uncharacterized [orf19.1389;orf19.1389;SGN11;orf19.8967;IPF18804.2;IPF12381.2;Contig4-2576_0010;orf6.2075;orf6.2241;CA0885;CaO19.1389;IPF12381]
Cal409890W	orf19.1409.1	0.915	1.913	1.414	Predicted ORF in Assembly 20 and 21; gene has intron; Uncharacterized [orf19.1409.1;orf19.1409.1]
Cal407410W	orf19.1439	1.042	1.865	1.4535	Predicted ORF in Assemblies 19, 20 and 21; Uncharacterized [orf19.1439;orf19.1439;orf19.9013;IPF25886.1;IPF10566.1;Contig4-2265_0006;orf6.1053;CA0280;CaO19.1439;IPF10566]
Cal210500W	orf19.145	1.318	1.605	1.4615	Protein similar to S. cerevisiae Rpb4p, which is a component of RNA polymerase II; transposon mutation affects filamentous growth; Verified [orf19.145;orf19.145;orf19.7785;orf19.7786;IPF27151.1;IPF27153.1;IPF19620.1;IPF19621.1;orf6.1177;orf6.1178;CA0351;CA0352;orf19.146;RPB4.3f]
Cal210480C	orf19.145	1.022	1.741	1.3815	Protein similar to S. cerevisiae Rpb4p, which is a component of RNA polymerase II; transposon mutation affects filamentous growth; Verified [orf19.145;orf19.145;orf19.7785;orf19.7786;IPF27151.1;IPF27153.1;IPF19620.1;IPF19621.1;orf6.1177;orf6.1178;CA0351;CA0352;orf19.146;RPB4.3f]
Cal203430C	orf19.1470	1.481	2.374	1.9275	Predicted ribosomal protein; regulated by Nrg1p, Tup1p; genes encoding cytoplasmic ribosomal subunits, translation factors, and tRNA synthetases are downregulated upon phagocytosis by murine macrophage; intron in 5'-UTR; Uncharacterized [orf19.1470;orf19.1470;RPS26;orf19.9045;IPF25866.1;IPF4380.2;Contig4-3015_0015;orf6.7103;CA4534;CaO19.1470;CaO19.9045]
Cal203440W	orf19.1470	1.268	1.853	1.5605	Predicted ribosomal protein; regulated by Nrg1p, Tup1p; genes encoding cytoplasmic ribosomal subunits, translation factors, and tRNA synthetases are downregulated upon phagocytosis by murine macrophage; intron in 5'-UTR; Uncharacterized [orf19.1470;orf19.1470;RPS26;orf19.9045;IPF25866.1;IPF4380.2;Contig4-3015_0015;orf6.7103;CA4534;CaO19.1470;CaO19.9045]
Cal203720W	orf19.1484	1.536	2.12	1.828	Predicted ORF in Assemblies 19, 20 and 21; Uncharacterized [orf19.1484;orf19.1484;orf19.9059;IPF25804.1;IPF19889.1;Contig4-2638_0001;orf6.2108;CA0907;CaO19.9059;CaO19.1484;IPF19889]
Cal203890W	orf19.1490.1	1.56	2.338	1.949	Predicted ORF in retrotransposon Tca16 with similarity to the Gag-Pol region of retrotransposons; added to Assembly 21 based on comparative genome analysis; overlaps orf19.1490.2, which is annotated as blocked reading frame; Uncharacterized [orf19.1490.1;orf19.1490.1]
Cal204140C	orf19.1505	0.857	1.737	1.297	Predicted ORF in Assemblies 19, 20 and 21; Uncharacterized [orf19.1505;orf19.1505;orf19.9081;IPF13689;IPF13689.2;IPF18995.2;Contig4-2650_0009;orf6.1309;orf6.3537;CA1856;CaO19.1505]
Cal204700C	orf19.1533	0.772	1.582	1.177	Predicted ORF in Assemblies 19, 20 and 21; Uncharacterized [orf19.1533;orf19.1533;orf19.9108;IPF15116.1;IPF17419.2;Contig4-1607_0002;orf6.839;CA0201;CaO19.1533;IPF17419;IPF15116]
Cal204710W	orf19.1533	0.842	1.237	1.0395	Predicted ORF in Assemblies 19, 20 and 21; Uncharacterized [orf19.1533;orf19.1533;orf19.9108;IPF15116.1;IPF17419.2;Contig4-1607_0002;orf6.839;CA0201;CaO19.1533;IPF17419;IPF15116]
Cal204740W	orf19.1534	0.988	1.78	1.384	Protein similar to S. cerevisiae Zrt3p, which is a transporter of zinc ions; predicted Kex2p substrate; Uncharacterized [orf19.1534;orf19.1534;ZRT3;orf19.9109;orf6.1064;IPF15119.2;IPF19059.2;orf6.838;CA0200;CaO19.1534;IPF15119]
Cal204750C	orf19.1535	1.395	1.938	1.6665	Predicted ORF in Assemblies 19, 20 and 21; possibly spurious ORF (Annotation Working Group prediction); Uncharacterized [orf19.1535;orf19.1535;orf19.9110;IPF25803.1;IPF14392.2;Contig4-2088_0007;orf6.1063;CA0285;CaO19.9110;CaO19.1535;IPF14392]
Cal204950W	orf19.1543	0.535	1.47	1.0025	Functional homolog of S. cerevisiae Opi1p, which is a transcriptional repressor of INO1 involved in inositol biosynthesis; has leucine zipper and putative Opi1-Sin3 interaction domain; interacts with ScSin3p, but not CaSin3p ; Verified [orf19.1543;orf19.1543;orf19.9117;orf6.6401;IPF6498;IPF25784.1;IPF6498.2;Contig4-2847_0013;CA3971;CaO19.1543;CaO19.9117]
Cal210650W	orf19.155	1.299	2.607	1.953	Functional homolog of S. cerevisiae Ure2p, which is a regulator of nitrogen utilization, and which also has a prion form called [URE3]; Verified [orf19.155;orf19.155;orf19.7794;IPF15126.2;IPF19196.2;orf6.658;orf6.939;CA0233;CaO19.155]
Cal205240C	orf19.1562	0.774	1.433	1.1035	Predicted ORF in Assemblies 19, 20 and 21; transcription is repressed in response to alpha pheromone in SpiderM medium; Uncharacterized [orf19.1562;orf19.1562;orf19.9135;IPF25811.1;IPF7141.1;Contig4-2824_0006;orf6.6419;CA3986;CaO19.9135;CaO19.1562;IPF7141]
Cal205510W	orf19.1576	0.655	1.39	1.0225	Predicted ORF in Assemblies 19, 20 and 21; Uncharacterized [orf19.1576;orf19.1576;orf19.9149;IPF25763.1;IPF9632.2;Contig4-2410_0005;orf6.5344;CA3167;CaO19.1576;CaO19.9149;IPF9632]
Cal205530C	orf19.1577	0.878	1.424	1.151	Predicted ORF in Assemblies 19, 20 and 21; Uncharacterized [orf19.1577;orf19.1577;orf19.9150;IPF25781.1;IPF9634.1;Contig4-3005_0030;orf6.5343;CA3166;CaO19.1577;CaO19.9150;IPF9634]
Cal302540C	orf19.158	1.632	2.047	1.8395	Predicted ORF in Assemblies 19, 20 and 21; Uncharacterized [orf19.158;orf19.158;APD1;Contig4-1515_0003;orf6.136;CaO19.158;CA0019;IPF17799;IPF17799.1]
Cal408810W	orf19.1595	0.808	1.3	1.054	Predicted ORF in Assemblies 19, 20 and 21; Uncharacterized [orf19.1595;orf19.1595;orf19.9163;IPF25734.1;IPF15033.2;Contig4-1965_0005;orf6.1081;CA0295;IPF15033.5eoc;IPF15033]
Cal221200W	orf19.1601	0.827	1.786	1.3065	Putative ribosomal protein; similar to S. cerevisiae Rpl3p; gene induced by ciclopirox olamine treatment; genes encoding cytoplasmic ribosomal subunits are downregulated upon phagocytosis by murine macrophage; Uncharacterized [orf19.1601;orf19.1601;orf19.9169;IPF25724.1;IPF6742.1;Contig4-3095_0054;orf6.1650;CA0615;CaO19.1601;CaO19.9169]
Cal305550W	orf19.1608	0.116	2.641	1.3785	Predicted ORF in Assemblies 19, 20 and 21; Uncharacterized [orf19.1608;orf19.1608;AYS1;orf19.9176;IPF25615.1;IPF13564.2;Contig4-1822_0006;orf6.1934;CA0797;CaO19.1608;CaO19.9176;IPF13564]
Cal305520W	orf19.1609	1.064	1.838	1.451	Predicted ORF in Assemblies 19, 20 and 21; Uncharacterized [orf19.1609;orf19.1609;KRI1;orf19.9177;IPF13565.2;IPF19865.2;Contig4-1822_0002;Contig4-1822_0003;orf6.1340;orf6.1935;CA0798;CaO19.1609;IPF13565]
Cal305250W	orf19.1620	0.745	1.482	1.1135	Predicted ORF in Assemblies 19, 20 and 21; transcription is induced in response to alpha pheromone in SpiderM medium; Uncharacterized [orf19.1620;orf19.1620;orf19.9188;IPF25665.1;IPF4234.2;Contig4-2798_0014;orf6.6452;CA4013;CaO19.9188;CaO19.1620;IPF4234]
Cal304910W	orf19.1634	1.291	2.117	1.704	Predicted ORF in Assemblies 19, 20 and 21; Uncharacterized [orf19.1634;orf19.1634;orf19.9202;IPF25639.1;IPF4258.2;Contig4-2997_0015;orf6.6438;CA4002;IPF4258]
Cal304900W	orf19.1635	0.93	1.503	1.2165	Predicted ribosomal protein; downregulated in the presence of human whole blood or polymorphonuclear (PMN) cells; genes encoding cytoplasmic ribosomal subunits are downregulated upon phagocytosis by murine macrophage; Tbf1p-activated; Uncharacterized [orf19.1635;orf19.1635;orf19.9203;IPF25668.1;IPF4260.2;RPL15B;Contig4-2997_0012;orf6.6437;CA4001;CaO19.9203;CaO19.1635]
Cal304450W	orf19.1656	0.545	2.061	1.303	Predicted ORF in Assemblies 19, 20 and 21; Uncharacterized [orf19.1656;orf19.1656;orf19.9225;IPF25614.1;IPF13675.2;Contig4-2722_0003;orf6.1219;CA0369;CaO19.9225;CaO19.1656;IPF13675]
Cal304420W	orf19.1658	0.887	1.565	1.226	Predicted ORF in Assemblies 19, 20 and 21; Uncharacterized [orf19.1658;orf19.1658;orf19.9226;orf19.9227;IPF19685.1;IPF29349.1;Contig4-1784_0004;Contig4-2479_0002;Contig4-2479_0003;orf6.833;orf6.834;CA0198;orf19.1657;IPF19685]
Cal304380W	orf19.1659	1.272	2.013	1.6425	Putative glucosyltransferase involved in cell wall mannan biosynthesis; transcription is elevated in nik1 and sln1 homozygous null mutants, but not in the chk1 null mutant; Uncharacterized [orf19.1659;orf19.1659;orf19.9228;IPF25617.1;IPF12530.2;Contig4-2479_0006;orf6.5734;CA3463;CaO19.1659]
Cal303980C	orf19.1672	0.83	1.328	1.079	Predicted ORF in Assemblies 19, 20 and 21; Uncharacterized [orf19.1672;orf19.1672;COP1;orf19.9241;IPF8079.2;IPF29375.1;Contig4-3069_0031;orf6.1640;CA0606;CaO19.1672]
Cal303720W	orf19.1682	0.714	1.393	1.0535	Predicted ORF in Assemblies 19, 20 and 21; repressed by nitric oxide; Verified [orf19.1682;orf19.1682;orf19.9251;IPF25637.1;IPF11681.2;Contig4-2363_0002;orf6.889;CA0216;CaO19.1682;CaO19.9251;IPF11681]
Cal303670C	orf19.1684	-0.355	2.866	1.2555	Predicted ORF in Assemblies 19, 20 and 21; Uncharacterized [orf19.1684;orf19.1684;orf19.9253;IPF11676.2;IPF29339.1;Contig4-2363_0007;orf6.4155;orf6.1329;CA2307;CaO19.1684;IPF18488;IPF18488.5eoc;IPF18488.1]
CalR05670C	orf19.169	2.089	3.239	2.664	Putative phosphatidyl-ethanolamine N-methyltransferase; fungal-specific (no human or murine homolog); amphotericin B repressed; Uncharacterized [orf19.169;orf19.169;orf19.7802;IPF19595.2;IPF19594.1;Contig4-2571_0007;orf6.2905;orf6.628;CA1414;CaO19.169]
Cal303430C	orf19.1699	0.918	1.723	1.3205	Protein similar to <i>S. cerevisiae</i> Bzz1p, which is an SH3 domain protein involved in the regulation of actin polymerization; Uncharacterized [orf19.1699;orf19.1699;orf19.9266;IPF25611.1;IPF13661.3;Contig4-2869_0011;orf6.3040;orf6.374;CA0060;CaO19.1699;IPF13661;IPF13661.2]
Cal214240W	orf19.17	2.151	3.914	3.0325	Predicted ORF in Assemblies 19, 20 and 21; constitutive expression independent of MTL or white-opaque status; Uncharacterized [orf19.17;orf19.17;orf19.7688;IPF3874.2;IPF29979.1;CA6167;CaO19.17]
Cal214230C	orf19.17	1.114	1.631	1.3725	Predicted ORF in Assemblies 19, 20 and 21; constitutive expression independent of MTL or white-opaque status; Uncharacterized [orf19.17;orf19.17;orf19.7688;IPF3874.2;IPF29979.1;CA6167;CaO19.17]
Cal303420W	orf19.1700	1.19	1.984	1.587	Predicted ribosomal protein; genes encoding cytoplasmic ribosomal subunits, translation factors, and tRNA synthetases are downregulated upon phagocytosis by murine macrophage; Uncharacterized [orf19.1700;orf19.1700;RPS7;orf19.9267;IPF13662.1;IPF29352.1;Contig4-2869_0009;orf6.3041;CA1502;CaO19.1700]
Cal303140C	orf19.1712	1.117	1.762	1.4395	Protein described as an ARF GTP/GDP exchange factor; transcriptionally regulated by iron; expression greater in low iron; Uncharacterized [orf19.1712;orf19.1712;orf19.9279;orf19.9280;orf6.3114;IPF25656.1;IPF25714.1;IPF14074.1;IPF14077.1;Contig4-2180_0007;orf6.3115;CA1555;CA1554;orf19.1713;GEA2.5f]
Cal303060W	orf19.1716	0.88	2.573	1.7265	Orotidine-5'-phosphate decarboxylase, enzyme of pyrimidine biosynthesis; gene used as a molecular genetic marker, but decreased expression when integrated at ectopic chromosomal locations can cause defects in hyphal growth and virulence; Verified [orf19.1716;orf19.1716;orf19.9284;IPF25647.1;IPF11364.1;Contig4-2578_0003;orf6.4844;CA2801;CaO19.9284;CaO19.1716]
Cal303020W	orf19.1717	1.15	1.594	1.372	Predicted ORF in Assemblies 19, 20 and 21; Uncharacterized [orf19.1717;orf19.1717;orf19.9285;orf6.4843;IPF25627.1;IPF11366.2;Contig4-2578_0002;CA2800;CaO19.1717;CaO19.9285;IPF11366]
Cal303010W	orf19.1718	1.135	1.933	1.534	Predicted zinc-finger protein of unknown function; decreased transcription is observed upon fluphenazine treatment; Uncharacterized [orf19.1718;orf19.1718;orf19.9286;IPF25589.1;IPF19769.1;orf6.4842;CA2799;CaO19.1718;CaO19.9286;IPF19769]
Cal223440W	orf19.1742	0.872	1.529	1.2005	Hydroxymethylbilane synthase (uroporphyrinogen I synthase); catalyzes conversion of 4-porphobilinogen to hydroxymethylbilane, the third step in the heme biosynthetic pathway; transcription greater in high iron, CO2; alkaline downregulated; Verified [orf19.1742;orf19.1742;orf19.9309;orf6.1095;IPF25565.1;IPF15629.3;Contig4-2299_0001;Contig4-2299_0002;CA0306;CaO19.1742;CaO19.9309;IPF15629.2]
Cal223300C	orf19.1746	0.768	1.337	1.0525	Predicted ORF in Assemblies 19, 20 and 21; similar to S. cerevisiae meiosis-specific, spore-wall-localized protein Ssp2p, which is required for wild-type formation of outer spore wall in S. cerevisiae; Uncharacterized [orf19.1746;orf19.1746;SSP2;orf19.9313;IPF16670.2;IPF10753.2;Contig4-2199_0007;orf6.2018;orf6.85;CA0851;Ca38F10.06;CaO19.1746;IPF16670]
Cal223090W	orf19.1756	1.413	2.177	1.795	Protein similar to S. cerevisiae glycerol-3-phosphate dehydrogenase (enzyme of glycerol biosynthesis); biofilm-induced expression; regulated by Efg1p; regulated by Tsa1p, Tsa1Bp under H2O2 stress conditions; Uncharacterized [orf19.1756;orf19.1756;orf19.9325;IPF25561.1;IPF6860.1;Contig4-2851_0007;orf6.4093;CA2263;CaO19.1756;CaO19.9325]
Cal222920W	orf19.1764	0.847	1.427	1.137	Predicted ORF in Assemblies 19, 20 and 21; Uncharacterized [orf19.1764;orf19.1764;orf19.9333;IPF16551.2;IPF29314.1;Contig4-2450_0007;orf6.2873;orf6.4085;CA6192;CaO19.1764;IPF29314]
Cal222840W	orf19.1767	1.308	1.866	1.587	Predicted ORF in Assemblies 19, 20 and 21; Uncharacterized [orf19.1767;orf19.1767;orf19.9336;IPF25557.1;IPF6149.2;Contig4-2062_0005;Contig4-2062_0006;orf6.2870;CA1392;CaO19.9336;CaO19.1767;IPF6149]
Cal222830C	orf19.1767	1.531	1.219	1.375	Predicted ORF in Assemblies 19, 20 and 21; Uncharacterized [orf19.1767;orf19.1767;orf19.9336;IPF25557.1;IPF6149.2;Contig4-2062_0005;Contig4-2062_0006;orf6.2870;CA1392;CaO19.9336;CaO19.1767;IPF6149]
Cal222770W	orf19.1769	1.154	1.808	1.481	Predicted ORF in Assemblies 19, 20 and 21; Uncharacterized [orf19.1769;orf19.1769;PLP2;orf19.9338;IPF17476.2;IPF17425.2;Contig4-1661_0003;orf6.245;orf6.2868;CA1389;CaO19.1769]
Cal222710C	orf19.1772	0.749	1.497	1.123	Predicted ORF in Assemblies 19, 20 and 21; Uncharacterized [orf19.1772;orf19.1772;orf19.9341;IPF25546.1;IPF16267.2;Contig4-1808_0003;orf6.1678;CA0634;CaO19.1772;CaO19.9341;IPF16267]
CalR15530W	orf19.178	1.289	1.507	1.398	Predicted ORF in Assemblies 19, 20 and 21; Uncharacterized [orf19.178;orf19.178;IPF17945.1;orf6.120;orf6.160;CA0025;CaO19.178;IPF17945]
Cal412030C	orf19.1791	0.855	1.388	1.1215	Predicted ORF in Assemblies 19, 20 and 21; Uncharacterized [orf19.1791;orf19.1791;MAK11;orf19.9357;IPF25533.1;IPF8738.2;Contig4-1853_0004;orf6.4370;CA2461]
Cal412120W	orf19.1795	0.529	1.629	1.079	Protein not essential for viability; similar to S. cerevisiae Puf3p, which is an mRNA-binding protein involved in RNA catabolism; Uncharacterized [orf19.1795;orf19.1795;orf19.9361;IPF8726;IPF25523.1;IPF8726.2;Contig4-2654_0006;orf6.4374;CA2465;CaO19.9361;CaO19.1795]
CalR11070W	orf19.1803	0.864	1.373	1.1185	Beta subunit of heterodimeric protein geranylgeranyltransferase type I; GGTase I enzyme binds zinc, is Mg-dependent; Cdc42p is GGTase I substrate; Verified [orf19.1803;orf19.1803;orf19.9369;IPF14866.2;IPF19031.1;Contig4-2476_0003;orf6.1162;orf6.1576;CA0571;CaO19.1803]
CalR11160C	orf19.1808	1.591	2.141	1.866	Putative protein of unknown function, transcription is positively regulated by Tbf1p; predicted ORF in Assemblies 19, 20 and 21; Uncharacterized [orf19.1808;orf19.1808;orf19.8246;orf19.9375;IPF25517.1;IPF15178.2;IPF26665.1;IPF11378.2;Contig4-2129_0007;orf6.443;orf6.1582;CA0575;CA0080;orf19.632;CaO19.9375;CaO19.1808;IPF15178.5eoc;IPF15178]
Cal216440W	orf19.1902	1.022	1.207	1.1145	Predicted ORF in Assemblies 19, 20 and 21; mutation confers resistance to 5-fluorocytosine (5-FC), 5-fluorouracil (5-FU), and tubercidin (7-deazaadenosine); Verified [orf19.1902;orf19.1902;orf19.9458;IPF25429.1;IPF9717.2;Contig4-2752_0016;orf6.7018;CA4470;CaO19.1902;CaO19.9458;IPF9717]
Cal503130W	orf19.1926	1.093	1.909	1.501	Putative zinc cluster protein; expression is repressed by Sfu1p under high-iron conditions; Uncharacterized [orf19.1926;orf19.1926;orf19.9482;orf19.11606;IPF25372.1;IPF15112.2;IPF23122.1;IPF18736.1;Contig4-2911_0020;orf6.1277;orf6.2618;CA0395;orf19.4129;CaO19.9482;CaO19.1926;SEF11.5eoc]
Cal210700W	orf19.194	1.026	1.742	1.384	Predicted ORF in Assemblies 19, 20 and 21; possibly spurious ORF (Annotation Working Group prediction); Uncharacterized [orf19.194;orf19.194;orf19.7824;IPF19562.1;IPF19563.2;Contig4-2639_0010;orf6.1143;orf6.197;CA0334;CaO19.194;IPF19562]
Cal502540W	orf19.1956	0.961	1.522	1.2415	Predicted ORF in Assemblies 19, 20 and 21; Uncharacterized [orf19.1956;orf19.1956;orf19.9511;IPF19331.2;IPF14757.2;Contig4-2143_0002;orf6.342;orf6.4083;CA2256;CaO19.1956;IPF14757]
Cal502360W	orf19.1964	1.875	2.204	2.0395	Putative protein of unknown function; downregulated upon fluphenazine treatment; upregulated upon benomyl treatment and in an RHE model; regulated by Nrg1p, Tup1p; Uncharacterized [orf19.1964;orf19.1964;AQR1;orf19.9520;IPF25368.1;IPF6298.2;IPF6298;Contig4-2813_0008;orf6.5040;CA2947;CaO19.1964;CaO19.9520]
Cal202780W	orf19.1993	1.589	1.935	1.762	Predicted ORF in Assemblies 19, 20 and 21; Uncharacterized [orf19.1993;orf19.1993;RPN9;orf19.9545;IPF25273.1;IPF14766.2;Contig4-2198_0009;orf6.6366;CA3948;CaO19.1993;CaO19.9545]
Cal202570W	orf19.2002	0.819	1.546	1.1825	Predicted ORF in Assemblies 19, 20 and 21; Uncharacterized [orf19.2002;orf19.2002;NIC96;orf19.9553;IPF4755.2;IPF29205.1;Contig4-1886_0001;orf6.6358;CA3940;CaO19.2002]
Cal202540W	orf19.2003	0.759	1.331	1.045	Predicted ORF in Assemblies 19, 20 and 21; mutation confers hypersensitivity to toxic ergosterol analog; shows colony morphology-related gene regulation by Ssn6p; clade-associated gene expression; Verified [orf19.2003;orf19.2003;HNM2;orf19.9554;IPF4757.1;IPF19469.2;Contig4-2862_0011;orf6.42;orf6.6357;CA3939;CaO19.2003]
Cal202450W	orf19.2006.1	0.768	1.314	1.041	ORF Predicted by Annotation Working Group; Uncharacterized [orf19.2006.1;orf19.2006.1;COX17;IPF25343.1;IPF14687.1;Contig4-2862_0004;CA3936]
Cal202320W	orf19.2014,orf19.2013	0.738	1.6	1.169	Protein kinase A regulatory subunit; required for nuclear localization of Tpk1; physically interacts with Tpk1; essential; apoptosis-regulated; bcy1 heterozygous or bcy1 tpk2 mutant has filamentous growth defect::Similar to Hsp70 family chaperones; role in translocation of proteins into the ER; induced in high iron; protein present in exponential and stationary growth phase yeast cultures; flow m…
Cal200450C	orf19.2111	1.083	1.839	1.461	Predicted ORF in Assemblies 19, 20 and 21; Uncharacterized [orf19.2111;orf19.2111;TFG2;orf19.9659;IPF25270.1;IPF19765.1;orf6.4750;CA2735;CaO19.9659;CaO19.2111]
Cal218360W	orf19.2166	0.832	1.69	1.261	Predicted ORF in Assemblies 19, 20 and 21; Uncharacterized [orf19.2166;orf19.2166;VMA5;orf19.9712;IPF13718.3;IPF29174.1;Contig4-2572_0004;orf6.1314;orf6.1803;CA0711;CaO19.2166;IPF13718.2]
Cal217950C	orf19.2179.2	1.117	1.832	1.4745	Predicted ribosomal protein; downregulated in the presence of human whole blood or polymorphonuclear (PMN) cells; Uncharacterized [orf19.2179.2;orf19.2179.2;IPF25168.1;IPF5524.1;Contig4-3057_0011;Contig4-3057_0012;CA3739;RPS10.3]
Cal217940W	orf19.2180	1.395	2.262	1.8285	Predicted ORF in Assemblies 19, 20 and 21; Uncharacterized [orf19.2180;orf19.2180;orf19.9726;IPF25136.1;IPF5526.1;Contig4-3057_0008;orf6.6083;CA3738;CaO19.9726;CaO19.2180;IPF5526]
Cal217400C	orf19.2204	1.337	1.22	1.2785	Predicted ORF in Assemblies 19, 20 and 21; Uncharacterized [orf19.2204;orf19.2204;orf19.9749;IPF25125.1;IPF5496.1;Contig4-3058_0014;Contig4-3058_0015;Contig4-3058_0016;orf6.3580;CA1887;CaO19.2204;CaO19.9749;IPF5496]
Cal218450W	orf19.2219,orf19.2127	1.12	1.555	1.3375	Predicted ORF in retrotransposon Tca3; similar to Gag-Pol; a-specific transcript, alpha-factor induced; rat catheter biofilm repressed; mRNA binds She3 :: Scaffold protein for the mitogen-activated protein (MAP) kinase cascade that regulates mating; required for opaque mating or white biofilm formation in response to mating pheromone; induced in response to pheromone; Hap43p-repressed
Cal215290C	orf19.2232	1.052	1.717	1.3845	Predicted ribosomal protein; genes encoding cytoplasmic ribosomal subunits, translation factors, and tRNA synthetases are downregulated upon phagocytosis by murine macrophage; colony morphology-related gene regulation by Ssn6p; Uncharacterized [orf19.2232;orf19.2232;orf19.9774;IPF25080.1;IPF9044.1;RPL11B;Contig4-2838_0014;orf6.1888;CA0763]
Cal215380W	orf19.2237.1	0.841	1.485	1.163	Predicted ORF in Assembly 20 and 21; gene has intron; Uncharacterized [orf19.2237.1;orf19.2237.1;CA6201;IPF13696;orf19.9779.1]
Cal215370W	orf19.2237.1	0.659	1.352	1.0055	Predicted ORF in Assembly 20 and 21; gene has intron; Uncharacterized [orf19.2237.1;orf19.2237.1;CA6201;IPF13696;orf19.9779.1]
Cal305620C	orf19.227	0.653	1.469	1.061	Predicted ORF in Assemblies 19, 20 and 21; flucytosine induced; repressed by nitric oxide; Uncharacterized [orf19.227;orf19.227;orf19.7857;IPF27081.1;IPF15250.2;Contig4-2074_0001;orf6.215;CA0031;CaO19.227;CaO19.7857]
Cal305650W	orf19.229	0.937	1.543	1.24	Predicted ORF in Assemblies 19, 20 and 21; Uncharacterized [orf19.229;orf19.229;orf19.7859;IPF27020.1;IPF15248.2;Contig4-2074_0003;orf6.217;CA0032;CaO19.229;CaO19.7859;IPF15248]
Cal125470C	orf19.2309.2	1.049	1.994	1.5215	ORF Predicted by Annotation Working Group; shows downregulation in infected rabbit kidney in SC5314, but not NGY152, strain background; Uncharacterized [orf19.2309.2;orf19.2309.2;IPF11739.1;IPF19095.2;Contig4-2919_0008;CA3307;RPL2.3]
Cal125450C	orf19.2310	0.743	1.3	1.0215	Predicted ORF in Assemblies 19, 20 and 21; Uncharacterized [orf19.2310;orf19.2310;orf19.9846;IPF24997.1;IPF11738.2;Contig4-2919_0009;orf6.5540;CA3306;CaO19.9846;CaO19.2310;IPF11738]
Cal125440W	orf19.2310.1	1.31	2.069	1.6895	Ribosomal protein L29; transcription is induced upon germ tube formation; shows colony morphology-related gene regulation by Ssn6p; intron in 5'-UTR; Uncharacterized [orf19.2310.1;orf19.2310.1;IPF24965.1;IPF11737.2;CA3305]
Cal125410W	orf19.2311	0.711	1.555	1.133	Predicted ribosomal protein; genes encoding cytoplasmic ribosomal subunits, translation factors, and tRNA synthetases are downregulated upon phagocytosis by murine macrophage; Uncharacterized [orf19.2311;orf19.2311;orf19.9847;IPF25000.1;IPF11736.2;RPL8B-2;Contig4-2919_0011;orf6.5539;CA3304;RPL8A;CaO19.2311;CaO19.9847]
Cal125060W	orf19.2329.1	0.899	1.467	1.183	Putative ribosomal protein; genes encoding cytoplasmic ribosomal subunits, translation factors, and tRNA synthetases are downregulated upon phagocytosis by murine macrophage; Uncharacterized [orf19.2329.1;orf19.2329.1;RPS17;IPF25018.1;IPF15290.2;Contig4-2080_0001;CA3341;RPS17.3]
Cal125070C	orf19.2330	0.745	1.459	1.102	Predicted ORF in Assemblies 19, 20 and 21; transposon mutation affects filamentous growth; decreased expression in response to prostaglandins; Verified [orf19.2330;orf19.2330;UTP6;orf19.9866;IPF24986.1;IPF13361.2;orf6.5578;YOR205C;CA3342;CaO19.9866;CaO19.2330;IPF13361]
Cal305760W	orf19.234	1.106	2.212	1.659	Predicted ORF in Assemblies 19, 20 and 21; decreased expression observed in an ssr1 homozygous null mutant; Uncharacterized [orf19.234;orf19.234;orf19.7864;IPF10101.2;IPF19241.1;PHA2.3;Contig4-2868_0006;orf6.953;orf6.521;CA0238]
Cal305750W	orf19.234	0.963	1.954	1.4585	Predicted ORF in Assemblies 19, 20 and 21; decreased expression observed in an ssr1 homozygous null mutant; Uncharacterized [orf19.234;orf19.234;orf19.7864;IPF10101.2;IPF19241.1;PHA2.3;Contig4-2868_0006;orf6.953;orf6.521;CA0238]
Cal305770C	orf19.236	1.364	2.257	1.8105	Predicted ribosomal protein; genes encoding cytoplasmic ribosomal subunits, translation factors, and tRNA synthetases are downregulated upon phagocytosis by murine macrophage; repressed by nitric oxide; Uncharacterized [orf19.236;orf19.236;RPL9;orf19.7866;IPF27046.1;IPF10099.1;Contig4-2868_0008;orf6.955;CA0239;CaO19.236;CaO19.7866]
Cal305780W	orf19.236	1.129	1.861	1.495	Predicted ribosomal protein; genes encoding cytoplasmic ribosomal subunits, translation factors, and tRNA synthetases are downregulated upon phagocytosis by murine macrophage; repressed by nitric oxide; Uncharacterized [orf19.236;orf19.236;RPL9;orf19.7866;IPF27046.1;IPF10099.1;Contig4-2868_0008;orf6.955;CA0239;CaO19.236;CaO19.7866]
CalR15770W	orf19.2360	0.85	1.508	1.179	Predicted ORF in Assemblies 19, 20 and 21; flucytosine induced; macrophage/pseudohyphal-induced; intron in 5'-UTR; Uncharacterized [orf19.2360;orf19.2360;orf19.9896;IPF10801.3;IPF29131.1;Contig4-2886_0007;Contig4-2886_0008;orf6.2755;orf6.610;CA1315;CaO19.2360;URA2.5eoc;IPF10801.2]
CalR07040C	orf19.2412	1.919	4.567	3.243	Predicted ORF in Assemblies 19, 20 and 21; Uncharacterized [orf19.2412;orf19.2412;VPS55;orf19.9950;IPF14991.1;IPF29117.1;Contig4-2124_0004;orf6.5181;CA3048;CaO19.9950;CaO19.2412;IPF14991]
Cal305940W	orf19.242.2	1.14	1.984	1.562	ORF Predicted by Annotation Working Group; Uncharacterized [orf19.242.2;orf19.242.2;YSY6;IPF10503.2;CA1267]
Cal113750C	orf19.2433	0.676	1.326	1.001	Predicted ORF in Assemblies 19, 20 and 21; Uncharacterized [orf19.2433;orf19.2433;orf19.9969;IPF17719.1;IPF15601.1;Contig4-2898_0002;orf6.1396;orf6.762;CA0458;CaO19.2433;IPF15601]
Cal113720W	orf19.2435	0.856	1.481	1.1685	Protein of the HSP70 family; antigenic; functional homolog of S. cerevisiae Msi3p; physically interacts (by 2-hybrid) with Cgr1p; transcriptionally regulated by iron; expression greater in high iron; farnesol downregulated in biofilm; Uncharacterized [orf19.2435;orf19.2435;SSE1;orf19.9971;orf6.760;IPF24829.1;IPF13776.3;orf6.3613;CA1911;CaO19.2435;IPF13776.2]
Cal112860W	orf19.2478.1	1.118	1.689	1.4035	ORF Predicted by Annotation Working Group; Uncharacterized [orf19.2478.1;orf19.2478.1;IPF7197.2;IPF16942.2;Contig4-2471_0002;orf6.4956;CA3800;RPL7A.3f;RPL7A.3]
Cal302460C	orf19.2513	2.942	3.763	3.3525	Predicted ORF in Assemblies 19, 20 and 21; Uncharacterized [orf19.2513;orf19.2513;orf19.10049;IPF24827.1;IPF12802.2;Contig4-1978_0004;Contig4-1978_0006;orf6.3918;CA2144;CaO19.2513;CaO19.10049;IPF12802]
CalR03130C	orf19.2518	5.11	7.0123	6.06115	Predicted ORF in Assemblies 19, 20 and 21; Uncharacterized [orf19.2518;orf19.2518;SEC17;orf19.10054;IPF24764.1;IPF4971.1;Contig4-2537_0005;orf6.1399;CA0460;CaO19.2518;CaO19.10054]
CalR03970W	orf19.2571	0.778	1.317	1.0475	Small GTPase of Rab family; role in secretion, post-Golgi; possible C-terminal palmitoylation; downregulated on adherence to polystyrene; not regulated on white-opaque or yeast-hyphal switching; functional homolog of S. cerevisiae Sec4p; Verified [orf19.2571;orf19.2571;orf19.10103;IPF24779.1;IPF2730.1;Contig4-3016_0005;orf6.4672;CA2681;CaO19.10103;CaO19.2571]
CalR04020W	orf19.2574,orf19.2575	1.1	1.837	1.4685	Ortholog(s) have Golgi apparatus localization:: Putative S-adenosylmethionine-dependent methyltransferase; Hap43p-induced gene
CalR04160C	orf19.2583,orf19.2583.1	0.919	1.235	1.077	Oligopeptide transporter involved in uptake of di-/tripeptides; highly induced during chlamydospore formation in both C. albicans and C. dubliniensis :: Pseudogene; formerly an ORF Predicted by Annotation Working Group
CalR04410W	orf19.2601	0.593	1.457	1.025	Protein described as 5-aminolevulinate synthase; transcriptionally regulated by iron; caspofungin repressed; expression greater in high iron; regulated by Ssn6p; induced by nitric oxide; Verified [orf19.2601;orf19.2601;orf19.10132;orf6.3598;IPF2755.3;IPF29053.1;Contig4-2821_0018;orf6.4097;CA2266;CaO19.2601;IPF2755.2]
Cal406840W	orf19.2684	0.748	1.686	1.217	Predicted ORF in Assemblies 19, 20 and 21; Uncharacterized [orf19.2684;orf19.2684;SLK19;orf19.10199;IPF24581.1;IPF17011.2;orf6.4794;CA2768;CaO19.10199;CaO19.2684;IPF17011]
Cal405950W	orf19.2735	1.272	1.84	1.556	Predicted ORF in Assemblies 19, 20 and 21; mutation confers hypersensitivity to toxic ergosterol analog, and to amphotericin B; has intron in 5'-UTR; Verified [orf19.2735;orf19.2735;orf19.10249;IPF24615.1;IPF9170.2;Contig4-2731_0002;orf6.4691;CaO19.10249;CaO19.2735;CA2695;IPF9070]
Cal405720C	orf19.2747	0.414	3.681	2.0475	Transcriptional repressor involved in the regulation of glucose transporter genes; has zinc-cluster; similar to S. cerevisiae Rgt1p; Verified [orf19.2747;orf19.2747;orf19.10261;IPF24678.1;IPF14445.2;orf6.2537;CA1172;CaO19.2747;CaO19.10261]
Cal405730W	orf19.2747	0.945	1.89	1.4175	Transcriptional repressor involved in the regulation of glucose transporter genes; has zinc-cluster; similar to S. cerevisiae Rgt1p; Verified [orf19.2747;orf19.2747;orf19.10261;IPF24678.1;IPF14445.2;orf6.2537;CA1172;CaO19.2747;CaO19.10261]
Cal405490W	orf19.2756	0.946	1.687	1.3165	Predicted ORF in Assemblies 19, 20 and 21; Uncharacterized [orf19.2756;orf19.2756;ERD2;orf19.10270;IPF24630.1;IPF12003.1;Contig4-1891_0004;orf6.3588;CA1896;CaO19.2756;CaO19.10270]
Cal405270W	orf19.2767	0.737	1.314	1.0255	Putative GPI-anchored protein of unknown function; shows colony morphology-related gene regulation by Ssn6p; Verified [orf19.2767;orf19.2767;orf19.10283;IPF24649.1;IPF20008.1;Contig4-2513_0002;orf6.6585;CA4124;CaO19.10283;CaO19.2767;IPF20008]
Cal117310C	orf19.2784	0.617	1.526	1.0715	Predicted ORF in Assemblies 19, 20 and 21; Uncharacterized [orf19.2784;orf19.2784;orf19.10300;IPF24556.1;IPF7271.1;Contig4-2533_0003;Contig4-2533_0004;orf6.3601;CA1906;CaO19.2784;CaO19.10300;IPF7271]
Cal117110W	orf19.2792	0.842	3.635	2.2385	Predicted ORF in Assemblies 19, 20 and 21; Uncharacterized [orf19.2792;orf19.2792;orf19.10310;IPF7245.3;IPF17074.2;Contig4-2218_0006;orf6.3611;orf6.3721;CA2001;CaO19.2792;IPF17074]
CalR05820W	orf19.2819	0.725	1.586	1.1555	Predicted ORF in Assemblies 19, 20 and 21; possibly spurious ORF (Annotation Working Group prediction); Uncharacterized [orf19.2819;orf19.2819;orf19.10337;IPF24499.1;IPF10901.2;Contig4-2405_0004;orf6.1527;CA0538;CaO19.2819;CaO19.10337;IPF10901]
CalR05880C	orf19.2822	1.525	2.379	1.952	Predicted ORF in Assemblies 19, 20 and 21; possibly spurious ORF (Annotation Working Group prediction); Uncharacterized [orf19.2822;orf19.2822;COG2;orf19.10340;IPF10894.2;IPF10895.3;orf6.1530;orf6.2210;CA0970;CaO19.2822;IPF10894]
CalR05910W	orf19.2823	0.498	1.556	1.027	Transcriptional regulator of filamentous growth and hyphal genes; acts in Tup1p-dependent and -independent pathways; binds DNA; has HMG domain; not transcriptionally regulated by oxygen or serum; not responsible for hypoxic repression; Verified [orf19.2823;orf19.2823;ROX1;orf19.10341;orf6.1681;IPF14334.2;orf6.1166;orf6.1680;CA6270;CA0346;orf19.2824;RFG1.5f]
CalR06050W	orf19.2827	1.103	1.865	1.484	Predicted ORF in Assemblies 19, 20 and 21; Uncharacterized [orf19.2827;orf19.2827;TID3;orf19.10345;IPF10963.2;IPF28963.1;Contig4-1774_0003;orf6.1901;CA0770;CaO19.10345;CaO19.2827;IPF10963]
CalR06210W	orf19.2833	5.511	10.327	7.919	Putative GPI-anchored protein of unknown function; transcription is repressed in response to alpha pheromone in SpiderM medium; Uncharacterized [orf19.2833;orf19.2833;orf19.10351;IPF24503.1;IPF9101.2;Contig4-2770_0002;orf6.4494;CA2548;CaO19.10351;CaO19.2833;IPF9101]
CalR06190C	orf19.2833	1.041	3.378	2.2095	Putative GPI-anchored protein of unknown function; transcription is repressed in response to alpha pheromone in SpiderM medium; Uncharacterized [orf19.2833;orf19.2833;orf19.10351;IPF24503.1;IPF9101.2;Contig4-2770_0002;orf6.4494;CA2548;CaO19.10351;CaO19.2833;IPF9101]
CalR06840C	orf19.2864.1	0.785	1.723	1.254	Putative ribosomal protein; Plc1p-regulated; genes encoding cytoplasmic ribosomal subunits, translation factors, and tRNA synthetases are downregulated upon phagocytosis by murine macrophage; Uncharacterized [orf19.2864.1;orf19.2864.1;IPF24932.1;IPF29116.1;IPF7308.2;Contig4-1322_0001;CA6203;orf19.2425.2]
Cal414380C	orf19.2888	1.016	1.951	1.4835	Predicted ORF in Assemblies 19, 20 and 21; Uncharacterized [orf19.2888;orf19.2888;orf19.10406;IPF24448.1;IPF10431.2;Contig4-2827_0010;orf6.6134;CA3778;CaO19.2888;CaO19.10406;IPF10431]
Cal414330W	orf19.2891	1.248	1.543	1.3955	Predicted ORF in Assemblies 19, 20 and 21; Uncharacterized [orf19.2891;orf19.2891;AFG11;AFG1;orf19.10409;IPF24431.1;IPF10436.2;Contig4-2827_0002;orf6.6131;CA3775;CaO19.2891;CaO19.10409]
Cal105300C	orf19.2927	1.232	1.844	1.538	Protein with similarity to mannosyltransferases; Uncharacterized [orf19.2927;orf19.2927;orf19.10444;IPF18555.2;IPF14216.2;Contig4-2249_0006;orf6.1563;CA0563;CaO19.2927]
Cal105350W	orf19.2928	2.419	4.12	3.2695	Predicted ORF in Assemblies 19, 20 and 21; Uncharacterized [orf19.2928;orf19.2928;orf19.10445;IPF14219.2;IPF18940.2;Contig4-2249_0005;orf6.1564;orf6.3784;CA0564;CaO19.2928;IPF14219;CA2042]
Cal105450C	orf19.2934	0.649	1.369	1.009	Predicted ORF in Assemblies 19, 20 and 21; Uncharacterized [orf19.2934;orf19.2934;BUD20;orf19.10451;IPF8108.2;IPF28911.1;Contig4-2841_0004;orf6.3790;orf6.3998;CA2046;CaO19.2934;IPF8108]
Cal105470C	orf19.2934:orf19.2935	0.839	1.501	1.17	Similar to S. cerevisiae Bud20; predicted role in cellular bud site selection; rat catheter and Spider biofilm induced :: Ribosomal protein L10; intron in 5'-UTR; downregulated upon phagocytosis by murine macrophage; transcription regulated by yeast-hypha switch; Spider biofilm repressed
Cal105480W	orf19.2935	0.979	1.638	1.3085	Putative ribosomal protein; genes encoding cytoplasmic ribosomal subunits, translation factors, and tRNA synthetases downregulated upon phagocytosis by murine macrophage; transcription regulated upon yeast-hyphal switch; intron in 5'-UTR; Uncharacterized [orf19.2935;orf19.2935;orf19.10452;IPF8109.2;IPF28907.1;Contig4-2841_0005;orf6.3791;orf6.3999;CA2047;CaO19.2935]
Cal105570W	orf19.2939	1.248	2.012	1.63	Predicted ORF in Assemblies 19, 20 and 21; Uncharacterized [orf19.2939;orf19.2939;FMP32;orf19.10456;IPF24347.1;IPF8114.2;Contig4-2841_0011;orf6.4003;CA2200;CaO19.10456;CaO19.2939;IPF8114]
Cal105990W	orf19.2958	0.644	1.448	1.046	Predicted ORF in Assemblies 19, 20 and 21; Uncharacterized [orf19.2958;orf19.2958;MNN44;IFX1;orf19.10475;IPF24247.1;IPF4427.2;Contig4-2873_0015;orf6.6658;CA4175;CaO19.10475;CaO19.2958;IPF4425.repeat2]
Cal106750C	orf19.2994	1.276	1.885	1.5805	Protein described as ribosomal subunit; antigenic during murine systemic infection; genes encoding cytoplasmic ribosomal subunits, translation factors, and tRNA synthetases are downregulated upon phagocytosis by murine macrophage; Uncharacterized [orf19.2994;orf19.2994;orf19.10511;IPF24346.1;IPF5596.2;RPL13A;Contig4-3020_0010;orf6.4871;CA2818;CaO19.2994;CaO19.10511]
Cal106770W	orf19.2994.1	1.444	1.634	1.539	Macrophage/pseudohyphal-induced after 16 h; Uncharacterized [orf19.2994.1;orf19.2994.1;RPS16B;RPS16;IPF24384.1;IPF5598.2;Contig4-3020_0009;CA2817;RPS16.3]
Cal106780W	orf19.2995	0.961	1.739	1.35	Predicted ORF in Assemblies 19, 20 and 21; induced by nitric oxide; Uncharacterized [orf19.2995;orf19.2995;orf19.10512;IPF24338.1;IPF5601.2;Contig4-3020_0008;orf6.4870;CA2816;CaO19.2995;CaO19.10512;IPF5601]
Cal106920W	orf19.3002	1.121	1.741	1.431	Probable ortholog of S. cerevisiae ribosomal protein Rp10 (Rps1Ap and Rps1Bp), elicits a host antibody response during infection; transcription is induced during active growth; Uncharacterized [orf19.3002;orf19.3002;RPS10;orf19.10520;RP10;IPF5347.2;IPF28908.1;RPS1A;Contig4-3096_0003;orf6.4862;orf6.5287;CA2811;CaO19.3002;RPS3A]
Cal106980W	orf19.3003.1	0.927	1.819	1.373	Protein similar to S. cerevisiae Rpl6p, which is a ribosomal subunit; transposon mutation affects filamentous growth; translation-related genes are downregulated upon phagocytosis by murine macrophage; Verified [orf19.3003.1;orf19.3003.1;IPF24361.1;IPF5354.2;Contig4-3096_0006;CA3123;RPL6.3]
Cal106990W	orf19.3004	0.792	1.452	1.122	Predicted ORF in Assemblies 19, 20 and 21; Uncharacterized [orf19.3004;orf19.3004;orf19.10522;IPF24308.1;IPF5356.2;Contig4-3096_0008;orf6.5285;CA3122;CaO19.10522;CaO19.3004;IPF5356]
Cal108090C	orf19.3061.1	1.019	1.683	1.351	Predicted ORF in Assembly 20 and 21; gene has intron; similar to RPS22A/orf19.6265; Uncharacterized [orf19.3061.1;orf19.3061.1;orf19.3061.2;CA5086;RPS22B;CA5085;RPS22.exon2;IPF9280.2]
Cal108100W	orf19.3061.1:orf19.3062	1.111	1.705	1.408	Predicted ORF in Assembly 20 and 21; gene has intron; similar to RPS22A/orf19.6265; Uncharacterized [orf19.3061.1;orf19.3061.1;orf19.3061.2;CA5086;RPS22B;CA5085;RPS22.exon2;IPF9280.2] ::Ortholog(s) have role in chromatin remodeling and ASTRA complex, mitochondrion localization
Cal415980C	orf19.3086	1.719	1.9	1.8095	Predicted ORF in Assemblies 19, 20 and 21; Uncharacterized [orf19.3086;orf19.3086;SEC10;orf19.10598;IPF24157.1;IPF1725.2;Contig4-2594_0007;Contig4-2594_0009;orf6.3735;CA2012;CaO19.10598;CaO19.3086]
Cal415970W	orf19.3087	0.681	1.742	1.2115	Fusion of ubiquitin with the S34 protein of the small ribosomal subunit; mRNA decreases upon heat shock, appears to be degraded; functional homolog of S. cerevisiae RPS31; Verified [orf19.3087;orf19.3087;RPS31;orf19.10599;IPF24198.1;IPF1727.2;Contig4-2594_0005;orf6.3734;CA2011;CaO19.3087;CaO19.10599]
Cal415030W	orf19.3138	0.762	1.466	1.114	Nucleolar protein; flucytosine induced; Verified [orf19.3138;orf19.3138;orf19.10650;IPF24186.1;IPF3267.2;Contig4-3009_0002;orf6.5875;CA3570;CaO19.3138;CaO19.10650]
Cal215050W	orf19.3151	1.176	1.737	1.4565	Predicted ORF in Assemblies 19, 20 and 21; Uncharacterized [orf19.3151;orf19.3151;GRP6;orf19.10661;Contig4-2902_0012;IPF24148.1;IPF15804.2;orf6.1741;CA0672;CaO19.3151;CaO19.10661]
Cal302690W	orf19.3159	0.897	1.605	1.251	Protein likely to be essential for growth; similar to S. cerevisiae Utp20p, which is a putative snoRNA-binding protein; downregulated in core stress response; mutation confers resistance to 5-fluorocytosine (5-FC); Verified [orf19.3159;orf19.3159;orf19.9300;orf19.9301;orf19.10668;IPF25622.1;IPF25609.1;IPF18641.1;IPF18640.1;IPF24144.1;IPF14693.2;orf6.3233;orf6.3232;orf6.2690;YBL004;CA1640;CA1639;C…
Cal504000W	orf19.3192	0.8	1.358	1.079	Protein that interacts with Cdc37p and Crk1p in the two-hybrid system; potential ortholog of S. cerevisiae Sti1p; may be involved in Cdc37p chaperone activity; biofilm induced; soluble protein in hyphae; Verified [orf19.3192;orf19.3192;orf19.10702;orf6.1022;IPF9198.3;IPF19105.2;Contig4-1933_0004;orf6.4488;orf6.905;CA0265;CA6273;orf19.3191;STI1.5f]
Cal503820W	orf19.3202	1.294	1.908	1.601	Protein not essential for viability; Uncharacterized [orf19.3202;orf19.3202;orf19.10714;IPF9846;IPF9846.2;IPF28851.1;Contig4-2661_0004;Contig4-2661_0006;orf6.4397;CA2484;CaO19.3202]
Cal508930W	orf19.3209	0.813	1.556	1.1845	Protein lacking an ortholog in S. cerevisiae; transposon mutation affects filamentous growth; Verified [orf19.3209;orf19.3209;IPF24103.1;IPF28845.1;Contig4-2463_0016;orf6.1699;CaO19.3209]
Cal508890W	orf19.3210	2.074	1.353	1.7135	Predicted ORF in Assemblies 19, 20 and 21; Plc1p-regulated; possibly spurious ORF (Annotation Working Group prediction); Uncharacterized [orf19.3210;orf19.3210;orf19.10722;IPF24100.1;IPF12399.2;Contig4-2463_0004;orf6.1700;CA0648;CaO19.10722;CaO19.3210;IPF12399]
Cal508800W	orf19.3214	0.707	1.296	1.0015	Predicted ORF in Assemblies 19, 20 and 21; possibly spurious ORF (Annotation Working Group prediction); Uncharacterized [orf19.3214;orf19.3214;AES7;IFJ6;orf19.10726;IPF24098.1;IPF12814.2;Contig4-2443_0006;orf6.3196;CA1612;CaO19.10726;CaO19.3214]
Cal508660C	orf19.3219	0.999	1.25	1.1245	Predicted ORF in Assemblies 19, 20 and 21; Uncharacterized [orf19.3219;orf19.3219;orf19.10730;IPF24094.1;IPF14538.2;Contig4-2205_0004;Contig4-2205_0005;orf6.3200;CA1616;CaO19.3219;CaO19.10730;IPF14538]
CalR03040W	orf19.3222	1.087	1.773	1.43	Predicted ORF in Assemblies 19, 20 and 21; fungal-specific (no human or murine homolog); Uncharacterized [orf19.3222;orf19.3222;orf19.10733;IPF24090.1;IPF162.2;Contig4-3001_0003;orf6.1764;orf6.3022;CA0686;CaO19.10733;CaO19.3222;IPF162]
CalR02990W	orf19.3223	1.192	1.847	1.5195	Predicted ORF in Assemblies 19, 20 and 21; flucytosine induced; caspofungin repressed; macrophage/pseudohyphal-induced; Uncharacterized [orf19.3223;orf19.3223;orf19.10734;IPF163.2;IPF18904.2;ATP3.3;Contig4-3001_0004;Contig4-3001_0005;orf6.3023;orf6.1763;CA1489;CA6208;orf19.3224;ATP3.3f]
CalR02920W	orf19.3227	0.947	1.688	1.3175	Putative iron transporter; similar to S. cerevisiae Fth1p; Uncharacterized [orf19.3227;orf19.3227;FTR3;orf19.10737;IPF24031.1;IPF170.2;Contig4-3001_0016;orf6.3026;CA1493;CaO19.10737;CaO19.3227]
CalR02890W	orf19.3228	1.739	2.049	1.894	Predicted ORF in Assemblies 19, 20 and 21; mutation confers hypersensitivity to amphotericin B; Verified [orf19.3228;orf19.3228;orf19.10738;IPF24004.1;IPF171.2;Contig4-3001_0019;Contig4-3001_0021;Contig4-3001_0023;orf6.3027;CA1494;CaO19.10738;CaO19.3228;IPF171]
CalR02840W	orf19.3230	1.266	1.66	1.463	Predicted ORF in Assemblies 19, 20 and 21; mutation confers hypersensitivity to toxic ergosterol analog; Verified [orf19.3230;orf19.3230;orf19.10740;IPF24079.1;IPF179.1;Contig4-3001_0036;orf6.8230;CA5428;CaO19.3230;CaO19.10740]
CalR02800C	orf19.3231	0.762	1.459	1.1105	Predicted ORF in Assemblies 19, 20 and 21; Uncharacterized [orf19.3231;orf19.3231;CDC27;orf19.10741;IPF23992.1;IPF185.1;Contig4-2226_0007;orf6.8231;CA5429;CaO19.3231]
CalR02690W	orf19.3235	0.934	1.645	1.2895	Predicted ORF in Assemblies 19, 20 and 21; Uncharacterized [orf19.3235;orf19.3235;CAP01;orf19.10745;IPF24045.1;IPF199.2;orf6.8235;CA5434;CaO19.10745;CaO19.3235;IPF199]
CalR02440C	orf19.3250	0.857	1.755	1.306	Predicted ORF in Assemblies 19, 20 and 21; Uncharacterized [orf19.3250;orf19.3250;PRP40;orf19.10760;IPF24017.1;IPF234.1;Contig4-3062_0009;orf6.8250;CA5447;CaO19.3250;CaO19.10760;IPF234]
CalR02330W	orf19.3255	1.062	1.801	1.4315	Transcription is regulated upon yeast-hyphal switch; possibly spurious ORF (Annotation Working Group prediction); Uncharacterized [orf19.3255;orf19.3255;orf19.10765;IPF24070.1;IPF244.1;Contig4-3062_0001;orf6.8255;CaO19.3255;CaO19.10765]
CalR01980C	orf19.3268	0.88	1.529	1.2045	Ortholog of S. cerevisiae Tma19p (Ykl065cp); Uncharacterized [orf19.3268;orf19.3268;orf19.10778;IPF24053.1;IPF277.1;Contig4-2793_0010;orf6.8268;CA5460;CaO19.3268;CaO19.10778;IPF277]
Cal102760C	orf19.3317	0.789	1.346	1.0675	Predicted ORF in Assemblies 19, 20 and 21; Uncharacterized [orf19.3317;orf19.3317;SRB6;orf19.10827;IPF18196.2;IPF5748.2;Contig4-2978_0013;orf6.7212;CaO19.3317;CaO19.10827]
Cal102890C	orf19.3324	1.11	1.762	1.436	Protein similar to S. cerevisiae translation initiation factor; upregulated in highly virulent strain compared to less virulent strain; antigenic in human; flucytosine induced; translation-related genes are downregulated upon phagocytosis; Uncharacterized [orf19.3324;orf19.3324;TIF1;orf19.10834;IPF23942.1;IPF8319.1;Contig4-2976_0019;orf6.5030;CA2939;CaO19.3324;CaO19.10834]
Cal103190C	orf19.3334	0.616	1.789	1.2025	Predicted ribosomal protein; genes encoding cytoplasmic ribosomal subunits, translation factors, and tRNA synthetases are downregulated upon phagocytosis by murine macrophage; transcription is positively regulated by Tbf1p; Uncharacterized [orf19.3334;orf19.3334;RPS2;orf19.10845;IPF23952.1;IPF14407.1;Contig4-2144_0006;orf6.3341;CA1715;CaO19.3334;CaO19.10845]
Cal103550W	orf19.3354,orf19.5341	0.799	1.662	1.2305	Ortholog(s) have structural constituent of ribosome activity and 90S preribosome, cytosolic small ribosomal subunit, extracellular region, nucleolus localization :: Predicted ribosomal protein; repressed upon phagocytosis by murine macrophage; positively regulated by Tbf1; Spider biofilm repressed
Cal103700W	orf19.3360	0.929	1.293	1.111	Predicted ORF in Assemblies 19, 20 and 21; possibly spurious ORF (Annotation Working Group prediction); Uncharacterized [orf19.3360;orf19.3360;orf19.10868;IPF19902.1;IPF19845.1;Contig4-2197_0001;Contig4-2891_0002;orf6.2525;orf6.792;CA1165;CaO19.3360;IPF19902]
Cal407600W	orf19.3369	3.462	3.281	3.3715	Protein similar to S. cerevisiae Moh1p; transcription is induced in response to alpha pheromone in SpiderM medium; transcriptionally activated by Mnl1p under weak acid stress; Uncharacterized [orf19.3369;orf19.3369;orf19.10876;IPF10404.2;IPF28786.1;Contig4-1807_0003;Contig4-2147_0004;orf6.2579;orf6.2891;CA1199;CaO19.3369;IPF10404]
Cal407640W	orf19.3370	0.929	1.327	1.128	Protein similar to ubiquitin C-terminal hydrolase; localizes to cell surface of hyphal cells, but not yeast-form cells; repressed upon high-level peroxide stress; Verified [orf19.3370;orf19.3370;UBP10;orf19.10878;orf6.2580;IPF17685.3;IPF15624.1;Contig4-1346_0001;Contig4-1346_0002;Contig4-2147_0001;Contig4-2147_0003;orf6.2581;orf6.2890;CA1406;CaO19.3370]
Cal407790W	orf19.3376	0.987	1.514	1.2505	Predicted ORF in Assemblies 19, 20 and 21; Uncharacterized [orf19.3376;orf19.3376;orf19.10885;IPF16001.1;IPF13247.1;Contig4-1821_0002;orf6.1152;orf6.2936;CA0339;CaO19.3376;IPF13247]
Cal603790W	orf19.3415.1	0.91	1.95	1.43	Predicted ribosomal protein; Uncharacterized [orf19.3415.1;orf19.3415.1;IPF23866.1;IPF12449.2;Contig4-2923_0003;CA1298]
Cal603620C	orf19.3423	1.776	1.982	1.879	Putative translation initiation factor; genes encoding ribosomal subunits, translation factors, and tRNA synthetases are downregulated upon phagocytosis by murine macrophage; Uncharacterized [orf19.3423;orf19.3423;orf19.10927;IPF23831.1;IPF16643.2;Contig4-2520_0017;orf6.6102;CA3754;CaO19.3423;CaO19.10927]
Cal603630W	orf19.3423	0.774	1.227	1.0005	Putative translation initiation factor; genes encoding ribosomal subunits, translation factors, and tRNA synthetases are downregulated upon phagocytosis by murine macrophage; Uncharacterized [orf19.3423;orf19.3423;orf19.10927;IPF23831.1;IPF16643.2;Contig4-2520_0017;orf6.6102;CA3754;CaO19.3423;CaO19.10927]
Cal603570W	orf19.3426	1.186	1.788	1.487	Putative translation initiation factor; decreased expression in hyphae compared to yeast-form cells; genes encoding ribosomal subunits, translation factors, and tRNA synthetases are downregulated upon phagocytosis by murine macrophage; Uncharacterized [orf19.3426;orf19.3426;TIF51;orf19.10930;IPF23859.1;IPF20144.1;Contig4-2520_0008;orf6.6099;CA3752;TIF51.3f;TIF51.3]
Cal603470W	orf19.3430	2.375	3.823	3.099	Predicted ORF in Assemblies 19, 20 and 21; possibly spurious ORF (Annotation Working Group prediction); Uncharacterized [orf19.3430;orf19.3430;orf19.10934;IPF23839.1;IPF7385.2;Contig4-1688_0002;orf6.6095;CA3748;CaO19.3430;CaO19.10934;IPF7385]
Cal603370C	orf19.3432.1	0.897	1.443	1.17	Ortholog(s) have enzyme regulator activity, role in cation transport and plasma membrane localization
Cal602960W	orf19.3447	0.868	1.666	1.267	Predicted ORF in Assemblies 19, 20 and 21; Uncharacterized [orf19.3447;orf19.3447;PBN1;orf19.10951;IPF18703.2;IPF5328.2;Contig4-2814_0003;orf6.2793;orf6.6458;CA4017;CaO19.3447]
Cal602920C	orf19.3448	0.753	1.436	1.0945	Predicted ORF in Assemblies 19, 20 and 21; ketoconazole-repressed; possibly spurious ORF (Annotation Working Group prediction); Uncharacterized [orf19.3448;orf19.3448;orf19.10952;IPF5330.2;IPF28770.1;orf6.2792;orf6.6457;CA1339;CaO19.3448;IPF5330]
Cal602930W	orf19.3448	0.557	1.491	1.024	Predicted ORF in Assemblies 19, 20 and 21; ketoconazole-repressed; possibly spurious ORF (Annotation Working Group prediction); Uncharacterized [orf19.3448;orf19.3448;orf19.10952;IPF5330.2;IPF28770.1;orf6.2792;orf6.6457;CA1339;CaO19.3448;IPF5330]
Cal605230W	orf19.3476	0.694	1.509	1.1015	Predicted ORF in Assemblies 19, 20 and 21; Uncharacterized [orf19.3476;orf19.3476;HRR25;orf19.10980;IPF23792.1;IPF11729.2;Contig4-1746_0004;Contig4-2835_0008;orf6.4983;CA2902;CaO19.10980;CaO19.3476]
Cal605350W	orf19.3482	1.357	1.992	1.6745	Predicted ORF in Assemblies 19, 20 and 21; Uncharacterized [orf19.3482;orf19.3482;NPY1;orf19.10986;IPF23790.1;IPF14979.2;Contig4-2065_0003;orf6.4977;CA2897;CaO19.10986;CaO19.3482;IPF14979]
Cal214770W	orf19.35	1.924	1.966	1.945	Predicted ORF in Assemblies 19, 20 and 21; Uncharacterized [orf19.35;orf19.35;SKY2;orf19.7708;IPF13398.2;IPF19358.2;Contig4-2637_0007;Contig4-2637_0009;Contig4-2637_0013;orf6.1821;orf6.286;CA0724;CaO19.35;IPF13398]
Cal604570C	orf19.3504	1.104	1.855	1.4795	Putative ribosomal protein; genes encoding cytoplasmic ribosomal subunits, translation factors, and tRNA synthetases are downregulated upon phagocytosis by murine macrophage; Uncharacterized [orf19.3504;orf19.3504;orf19.10998;IPF23772.1;IPF9946.1;RPL23B;Contig4-2880_0015;orf6.4364;CA2454;RPL23B.3]
CalR12280W	orf19.3517	0.603	1.428	1.0155	Predicted ORF in Assemblies 19, 20 and 21; Uncharacterized [orf19.3517;orf19.3517;IPF12567.2;Contig4-2428_0011;CA0806;CaO19.3517;IPF12567;orf6.1950]
Cal211930C	orf19.3559,CD39	1.438	2.064	1.751	S. cerevisiae ortholog Mrps35p is a structural constituent of ribosome and localizes to mitochondrial small ribosomal subunit; the snoRNA CD39 is encoded within the MRPS35 intron
Cal212080C	orf19.3568	0.882	1.503	1.1925	Predicted ORF in Assemblies 19, 20 and 21; Uncharacterized [orf19.3568;orf19.3568;orf19.11052;IPF23717.1;IPF3198.2;Contig4-3023_0020;orf6.5761;CA3488;CaO19.11052;CaO19.3568;IPF3198]
Cal212160W	orf19.3572	1.3	2.107	1.7035	Predicted ORF in Assemblies 19, 20 and 21; Uncharacterized [orf19.3572;orf19.3572;orf19.11056;IPF23727.1;IPF3206.1;Contig4-3023_0015;orf6.5757;CA3486;CaO19.3572;CaO19.11056;IPF3206]
Cal212180W	orf19.3572.3	1.08	1.911	1.4955	ORF Predicted by Annotation Working Group; Uncharacterized [orf19.3572.3;orf19.3572.3;IPF23702.1;IPF3208.1;Contig4-3023_0009]
Cal214830W	orf19.36	0.69	1.796	1.243	Predicted ORF in Assemblies 19, 20 and 21; clade-associated gene expression; Uncharacterized [orf19.36;orf19.36;COG8;orf19.7709;IPF27217.1;IPF13402.1;Contig4-2637_0001;orf6.608;CA0131;CaO19.7709;CaO19.36;IPF13402]
Cal219670W	orf19.3600	0.747	1.273	1.01	Predicted ORF in Assemblies 19, 20 and 21; Uncharacterized [orf19.3600;orf19.3600;orf19.11083;IPF23678.1;IPF17655.2;Contig4-2333_0004;orf6.2227;CA0980;CaO19.11083;CaO19.3600;IPF17655]
Cal219610W	orf19.3603	15.891	10.076	12.9835	Predicted ORF in Assemblies 19, 20 and 21; Uncharacterized [orf19.3603;orf19.3603;orf19.11086;IPF23655.1;IPF16222.2;Contig4-1896_0001;Contig4-1896_0002;orf6.2224;CA0978;CaO19.11086;CaO19.3603;IPF16222]
Cal219630W	orf19.3603	0.924	1.694	1.309	Predicted ORF in Assemblies 19, 20 and 21; Uncharacterized [orf19.3603;orf19.3603;orf19.11086;IPF23655.1;IPF16222.2;Contig4-1896_0001;Contig4-1896_0002;orf6.2224;CA0978;CaO19.11086;CaO19.3603;IPF16222]
Cal219580W	orf19.3605	1.118	1.522	1.32	Predicted ORF in Assemblies 19, 20 and 21; Uncharacterized [orf19.3605;orf19.3605;PEX17;orf19.11088;IPF17165.2;IPF18755.1;Contig4-1774_0003;orf6.2222;orf6.2461;CA0976;CaO19.3605]
Cal219520C	orf19.3607	0.866	1.644	1.255	Predicted ORF in Assemblies 19, 20 and 21; Uncharacterized [orf19.3607;orf19.3607;orf19.11090;IPF18812.2;IPF5203.2;Contig4-2321_0004;Contig4-2321_0005;orf6.2463;orf6.2220;CA1126;CaO19.3607;IPF5203;ECM18.3eoc]
Cal219510W	orf19.3608	0.851	1.591	1.221	Predicted ORF in Assemblies 19, 20 and 21; Uncharacterized [orf19.3608;orf19.3608;MSH3;orf19.11091;IPF23697.1;IPF5201.2;Contig4-2321_0006;orf6.2464;CA1127;CaO19.11091;CaO19.3608]
Cal219360W	orf19.3615	0.737	1.435	1.086	Predicted ORF in Assemblies 19, 20 and 21; induced in core caspofungin response; increased expression observed in an ssr1 homozygous null mutant; induced by nitric oxide in yhb1 mutant; Uncharacterized [orf19.3615;orf19.3615;orf19.11098;IPF23666.1;IPF5192.2;Contig4-2505_0010;orf6.3285;CA1675;CaO19.3615;CaO19.11098;IPF5192]
Cal219100C	orf19.3626.1	0.639	1.553	1.096	ORF added to Assembly 21 based on comparative genome analysis; Uncharacterized [orf19.3626.1;orf19.3626.1;IPF18957.1;CA0505;IPF11988.3f;IPF11988.3]
Cal219000W	orf19.3630	0.954	1.546	1.25	Predicted ORF in Assemblies 19, 20 and 21; induced upon biofilm formation; Uncharacterized [orf19.3630;orf19.3630;orf19.11113;IPF23665.1;IPF10837.2;orf6.2709;CA1277;CaO19.11113;CaO19.3630;IPF10837]
Cal218980C	orf19.3631	1.231	1.8	1.5155	Predicted ORF in Assemblies 19, 20 and 21; possibly spurious ORF (Annotation Working Group prediction); Uncharacterized [orf19.3631;orf19.3631;orf19.11114;IPF14232.2;IPF28707.1;Contig4-2417_0005;orf6.2708;orf6.2747;CA1310;CaO19.3631;IPF14232;IPF14232.1]
Cal601680C	orf19.3642	0.836	1.571	1.2035	Putative cell wall glycosidase involved in biofilm formation; required for cell separation; hyphal induced; caspofungin repressed; Efg1p, Cph1p regulated; O-glycosylation, potential Kex2p substrate; 9 5' E-boxes; 5'-UTR intron; Verified [orf19.3642;orf19.3642;SUN4;orf19.11124;orf6.2071;IPF23637.1;IPF14577.2;Contig4-2119_0002;CA0883;CaO19.3642;CaO19.11124]
Cal601640W	orf19.3643	1.107	1.466	1.2865	Predicted ORF in Assemblies 19, 20 and 21; Uncharacterized [orf19.3643;orf19.3643;orf19.11126;IPF13346.1;IPF12371.2;Contig4-1804_0004;Contig4-3041_0003;orf6.2641;orf6.3034;CA1498;CaO19.3643;IPF12371;IPF12371.1]
Cal105070C	orf19.3686	1.259	1.953	1.606	Predicted ORF in Assemblies 19, 20 and 21; Uncharacterized [orf19.3686;orf19.3686;ATP12;orf19.11170;IPF23600.1;IPF13746.2;Contig4-2096_0001;orf6.3880;CA2113;CaO19.11170;CaO19.3686]
Cal105090W	orf19.3687	0.839	1.437	1.138	Predicted ORF in Assemblies 19, 20 and 21; Uncharacterized [orf19.3687;orf19.3687;PFD1;orf19.11171;IPF23613.1;IPF13747.2;Contig4-2096_0002;orf6.3879;CA2112;CaO19.11171;CaO19.3687]
Cal105140W	orf19.3689	1.222	1.767	1.4945	Predicted ORF in Assemblies 19, 20 and 21; decreased expression observed in an ssr1 homozygous null mutant; Uncharacterized [orf19.3689;orf19.3689;orf19.11173;orf19.11174;IPF23610.1;IPF23605.1;IPF18544.1;IPF13749.2;Contig4-2096_0004;Contig4-2096_0006;Contig4-2582_0008;orf6.3877;orf6.3876;CA2110;CA2109;orf19.3690;IPF13749.3f]
Cal105150C	orf19.3690.2	1.606	2.384	1.995	ORF Predicted by Annotation Working Group; Uncharacterized [orf19.3690.2;orf19.3690.2;IPF23615.1;IPF10719.1;CA2108;RPL26A.3f;RPL26A.3]
Cal705790C	orf19.3699	1.195	1.603	1.399	Putative protein phosphatase of the PTP family (tyrosine-specific), similar to <i>S. cerevisiae</i> Tep1p; Uncharacterized [orf19.3699;orf19.3699;orf19.11183;IPF23574.1;IPF19913.1;Contig4-2159_0001;Contig4-2159_0002;orf6.2878;CA1398;CaJ7.0306;CaO19.11183;CaO19.3699;CaJ7_0306;CaO19_3699;IPF19913]
CalR05200C	orf19.3736	0.655	1.708	1.1815	Protein similar to S. cerevisiae Kar4p, which has a role in karyogamy; transcription is opaque-specific, a-specific, and induced by alpha factor; Uncharacterized [orf19.3736;orf19.3736;orf19.11221;IPF23534.1;IPF4719.2;Contig4-3070_0014;orf6.1096;orf6.5466;CA0307;CaO19.3736;IPF4719]
CalR05010W	orf19.3746	1.084	1.795	1.4395	Oligopeptide transporter; transcriptionally induced upon phagocytosis by macrophage; macrophage/pseudohyphal-repressed after 16h; fluconazole-induced; virulence-group-correlated expression; fungal-specific (no human or murine homolog); Verified [orf19.3746;orf19.3746;OPT2;OPT22;IFC2;orf19.11233;IPF23519.1;IPF4732.2;IPF4737.2;Contig4-2422_0002;orf6.5478;CA3257;CA3258;CaO19.11231;CaO19.3746;orf6.54…
CalR04960W	orf19.3749	1.08	1.734	1.407	Oligopeptide transporter; transcriptionally induced upon phagocytosis by macrophage; induced by BSA or peptides; fluconazole-induced; upregulated by Rim101p at pH 8; virulence-group-correlated expression; no human or murine homolog; Verified [orf19.3749;orf19.3749;OPT3;OPT21;IPF4737.2;IPF12812.3;Contig4-2818_0020;orf6.5478;CA2349;CaO19.3749;IPF12812.2]
Cal128770W	orf19.3762	1.514	2.196	1.855	Predicted ORF in Assemblies 19, 20 and 21; Uncharacterized [orf19.3762;orf19.3762;orf19.11246;IPF23511.1;IPF8892.2;Contig4-2804_0015;orf6.3957;CA2175;CaO19.11246;CaO19.3762;IPF8892]
Cal411090C	orf19.3788	0.656	1.368	1.012	Predicted ORF in Assemblies 19, 20 and 21; possibly spurious ORF (Annotation Working Group prediction); Uncharacterized [orf19.3788;orf19.3788;orf19.11268;IPF23477.1;IPF6922.2;Contig4-2732_0015;orf6.152;orf6.2559;CA0023;CaO19.3788;IPF6922]
Cal411040C	orf19.3789	1.31	1.836	1.573	Predicted ribosomal protein; genes encoding cytoplasmic ribosomal subunits, translation factors, and tRNA synthetases are downregulated upon phagocytosis by murine macrophage; intron in 5'-UTR; Uncharacterized [orf19.3789;orf19.3789;RPL24;IPF18743.1;IPF6918.1;Contig4-2732_0018;Contig4-2732_0019;orf6.2560;orf6.3062;CA1189;CaO19.3789]
Cal411050W	orf19.3789:orf19.3788.1	0.654	1.454	1.054	Predicted ribosomal protein; genes encoding cytoplasmic ribosomal subunits, translation factors, and tRNA synthetases are downregulated upon phagocytosis by murine macrophage; intron in 5'-UTR; Uncharacterized [orf19.3789;orf19.3789;RPL24;IPF18743.1;IPF6918.1;Contig4-2732_0018;Contig4-2732_0019;orf6.2560;orf6.3062;CA1189;CaO19.3789] ::Ribosomal 60S subunit protein; pre-rRNA processing; pre-mRNA a…
Cal410800C	orf19.3801	1.054	1.008	1.031	Protein with weak similarity to S. cerevisiae Fus2p; induced by alpha pheromone mating factor in MTLa/MTLa opaque cells; Uncharacterized [orf19.3801;orf19.3801;orf19.11282;IPF9090.2;IPF28628.1;Contig4-2789_0005;Contig4-3100_0023;orf6.201;orf6.2919;CA1424;CaO19.3801;IPF9090]
Cal119060W	orf19.382,orf19.1435	0.514	1.54	1.027	Translation elongation factor 1-alpha; genes encoding ribosomal subunits, translation factors, and tRNA synthetases are downregulated upon phagocytosis by murine macrophage :: Translation elongation factor 1-alpha; at cell surface; binds human plasminogen; macrophage/pseudohyphal-induced; induced in RHE model of oral candidiasis, in clinical oral candidiasis isolates; possibly essential; Spider b…
CalR13940C	orf19.3876	1.172	1.959	1.5655	Predicted zinc-finger protein of unknown function; Uncharacterized [orf19.3876;orf19.3876;orf19.11357;IPF23387.1;IPF13229.2;orf6.5847;CA3551;CaO19.3876;CaO19.11357;IPF13229]
Cal509190C	orf19.3895	0.915	1.381	1.148	Chitinase; putative N-terminal catalytic domain, GPI anchor, O-mannosylated region, signal peptide; 3 N-glycosylation motifs; downregulated in core caspofungin response; induced in yeast-form cells; Cyr1p-, Efg1p-, pH-regulated; Verified [orf19.3895;orf19.3895;orf19.11376;orf6.2344;IPF19719.2;IPF15860.2;Contig4-2459_0002;CA1051;CaO19.3895]
Cal509610W	orf19.3914	1.128	1.676	1.402	Predicted ORF in Assemblies 19, 20 and 21; Uncharacterized [orf19.3914;orf19.3914;orf19.11396;IPF10027.2;IPF28563.1;Contig4-2194_0001;Contig4-2730_0010;orf6.5133;CA3016;CaO19.11396;CaO19.3914;IPF10027]
Cal510240W	orf19.3942	0.894	1.469	1.1815	Predicted ORF in Assemblies 19, 20 and 21; Uncharacterized [orf19.3942;orf19.3942;orf19.11424;IPF23299.1;IPF20086.1;Contig4-2929_0018;orf6.3229;CA1636;CaO19.3942;CaO19.11424;IPF20086]
Cal510250C	orf19.3942.1	1.046	1.787	1.4165	Downregulated in the presence of human whole blood or polymorphonuclear (PMN) cells; shows colony morphology-related gene regulation by Ssn6p; Uncharacterized [orf19.3942.1;orf19.3942.1;IPF23373.1;IPF20087.1;Contig4-2929_0019;CA1637;RPL43A.3]
Cal510650W	orf19.3963	0.761	1.421	1.091	Predicted ORF in Assemblies 19, 20 and 21; Uncharacterized [orf19.3963;orf19.3963;FMP10;orf19.11445;IPF23275.1;IPF5777.1;Contig4-3081_0010;orf6.3508;CA1838;CaO19.11445;CaO19.3963;IPF5777]
Cal510750W	orf19.3969	0.881	1.269	1.075	Predicted ORF in Assemblies 19, 20 and 21; Uncharacterized [orf19.3969;orf19.3969;orf19.11452;IPF8627.2;IPF28547.1;Contig4-3081_0036;orf6.2746;CA1309;IPF8627]
Cal510870C	orf19.3976	0.857	1.567	1.212	Predicted ORF in Assemblies 19, 20 and 21; Uncharacterized [orf19.3976;orf19.3976;JNM1;orf19.11459;IPF23268.1;IPF13623.2;Contig4-3081_0052;orf6.5652;CA3400;CaO19.3976;CaO19.11459]
Cal510910W	orf19.3978	0.62	1.419	1.0195	Predicted ORF in Assemblies 19, 20 and 21; Uncharacterized [orf19.3978;orf19.3978;orf19.11461;IPF23296.1;IPF8651.2;Contig4-1327_0001;orf6.5654;CA3402;CaO19.3978;CaO19.11461;IPF8651]
Cal511050W	orf19.3984	0.985	1.578	1.2815	Predicted ORF in Assemblies 19, 20 and 21; induced in core caspofungin response; increased expression observed in an ssr1 homozygous null mutant; induced by nitric oxide in yhb1 mutant; Uncharacterized [orf19.3984;orf19.3984;orf19.11467;IPF19142.1;IPF18339.2;orf6.5660;orf6.7397;orf6.794;CA0184;IPF19142]
Cal511130W	orf19.3990	0.951	1.298	1.1245	Predicted ORF in Assemblies 19, 20 and 21; Uncharacterized [orf19.3990;orf19.3990;orf19.11473;IPF23301.1;IPF9652.2;Contig4-2740_0008;orf6.7403;CA4760;CaO19.11473;CaO19.3990;IPF9652]
Cal511340W	orf19.4001	0.784	1.448	1.116	Predicted ORF in Assemblies 19, 20 and 21; Uncharacterized [orf19.4001;orf19.4001;MSS2;orf19.11484;IPF23254.1;IPF9384.2;Contig4-2616_0008;orf6.7414;CA4769;CaO19.11484;CaO19.4001;IPF9384]
Cal511770C	orf19.4026	5.178	5.408	5.293	ATP phosphoribosyl transferase; enzyme of histidine biosynthesis; fungal-specific (no human, murine homolog); upregulated in biofilm; acid upregulated/alkaline downregulated by Rim101p; regulated by Gcn2p, Gcn4p; strain CA9 is a his1 mutant; Verified [orf19.4026;orf19.4026;orf19.11509;IPF23273.1;IPF3372.2;Contig4-3094_0023;orf6.7439;CA4792;CaO19.11509;CaO19.4026]
Cal512080C	orf19.4051	0.912	1.55	1.231	Putative tRNA-His synthetase; genes encoding ribosomal subunits, translation factors, and tRNA synthetases are downregulated upon phagocytosis by murine macrophage; Uncharacterized [orf19.4051;orf19.4051;orf19.11533;IPF23244.1;IPF7230.2;Contig4-2715_0007;orf6.4417;CA2494;CaO19.11533;CaO19.4051]
Cal220490W	orf19.4066	0.657	1.57	1.1135	Predicted ORF in Assemblies 19, 20 and 21; Hog1p-downregulated; Uncharacterized [orf19.4066;orf19.4066;orf19.7826;orf19.11549;IPF23131.1;IPF9466.2;Contig4-2273_0002;orf6.207;orf6.2484;CA1139;orf19.196;CaO19.11549;CaO19.4066;IPF9466]
Cal213590W	orf19.4116	0.739	1.398	1.0685	Protein not essential for viability; Uncharacterized [orf19.4116;orf19.4116;orf19.11597;IPF2125;IPF23145.1;IPF2125.2;Contig4-2528_0003;orf6.6820;CA4310;CaO19.4116;CaO19.11597]
Cal112440C	orf19.413	2.755	2.56	2.6575	Transcription is positively regulated by Sfu1p; Uncharacterized [orf19.413;orf19.413;orf19.8043;orf6.2094;IPF4902.1;IPF29827.1;Contig4-3004_0013;CA0897;CaO19.413;IPF4902]
Cal503170C	orf19.4133	0.895	1.618	1.2565	Predicted ORF in Assemblies 19, 20 and 21; Uncharacterized [orf19.4133;orf19.4133;orf19.11610;IPF23119.1;IPF14872.2;Contig4-2911_0014;orf6.2614;CA1221;CaO19.4133;CaO19.11610;IPF14872]
Cal503320W	orf19.4145	1.04	1.822	1.431	Predicted zinc-finger protein of unknown function; Uncharacterized [orf19.4145;orf19.4145;orf19.11621;IPF9826.2;IPF19172.2;Contig4-2294_0005;Contig4-2911_0001;orf6.236;orf6.5234;orf6.720;CA3088;CaO19.4145;IPF9826]
Cal503410C	orf19.4149	1.068	1.988	1.528	Predicted ORF in Assemblies 19, 20 and 21; Uncharacterized [orf19.4149;orf19.4149;orf19.11625;IPF23121.1;IPF11625.2;Contig4-2850_0005;Contig4-2850_0007;orf6.5230;CA3084;CaO19.4149;CaO19.11625;IPF11625]
Cal503420W	orf19.4149	1.014	1.762	1.388	Predicted ORF in Assemblies 19, 20 and 21; Uncharacterized [orf19.4149;orf19.4149;orf19.11625;IPF23121.1;IPF11625.2;Contig4-2850_0005;Contig4-2850_0007;orf6.5230;CA3084;CaO19.4149;CaO19.11625;IPF11625]
Cal503460W	orf19.4151	1.281	1.569	1.425	Protein similar to phospholipase B; fungal-specific (no human or murine homolog); Uncharacterized [orf19.4151;orf19.4151;orf19.11628;IPF23116.1;IPF16830.2;Contig4-2850_0013;orf6.5227;orf6.553;CA0111;CaO19.4151;IPF16830]
Cal503470C	orf19.4152	1.419	1.868	1.6435	Translation elongation factor 3 (EF-3); antigenic in human; predicted C-term nucleotide-binding active site, poly-Lys region; localizes to surface of yeast form, not hyphae; polystyrene adherence induced; EF-3 is fungal-specific; Verified [orf19.4152;orf19.4152;TEF3;YEF3;EFT3;HEF1;orf19.11629;IPF11638.2;IPF16826.3;Contig4-2850_0015;orf6.5226;orf6.552;CA3081;CaO19.4152]
Cal503490W	orf19.4152	0.992	1.64	1.316	Translation elongation factor 3 (EF-3); antigenic in human; predicted C-term nucleotide-binding active site, poly-Lys region; localizes to surface of yeast form, not hyphae; polystyrene adherence induced; EF-3 is fungal-specific; Verified [orf19.4152;orf19.4152;TEF3;YEF3;EFT3;HEF1;orf19.11629;IPF11638.2;IPF16826.3;Contig4-2850_0015;orf6.5226;orf6.552;CA3081;CaO19.4152]
Cal401680C	orf19.4163	1.11	2.035	1.5725	Predicted ORF in Assemblies 19, 20 and 21; Uncharacterized [orf19.4163;orf19.4163;orf19.11639;IPF16223.2;IPF28511.1;orf6.6057;CA3714;CaO19.4163;CaO19.11639;IPF16223]
Cal401660C	orf19.4164	0.932	1.57	1.251	Predicted ORF in Assemblies 19, 20 and 21; Uncharacterized [orf19.4164;orf19.4164;orf19.11640;IPF23100.1;IPF6205.2;Contig4-2878_0020;orf6.6058;CA3715;CaO19.4164;CaO19.11640;IPF6205]
Cal601320C	orf19.4193.1	0.728	1.832	1.28	Putative ribosomal protein; ORF predicted by Annotation Working Group; Uncharacterized [orf19.4193.1;orf19.4193.1;IPF23071.1;IPF13509.2;Contig4-2373_0006;CA1304;RPS13.3]
Cal504890C	orf19.4231	1.296	2.205	1.7505	Predicted ORF in Assemblies 19, 20 and 21; constitutive expression independent of MTL or white-opaque status; Uncharacterized [orf19.4231;orf19.4231;orf19.11706;IPF16485.2;IPF19085.2;Contig4-1833_0002;orf6.6614;orf6.966;CA6212;CaO19.11706;CaO19.4231;CA4141]
Cal505180C	orf19.4245	0.811	1.237	1.024	Predicted ORF in Assemblies 19, 20 and 21; Uncharacterized [orf19.4245;orf19.4245;orf19.11720;IPF20009.1;IPF19942.1;Contig4-1884_0003;Contig4-1884_0004;orf6.3979;orf6.6600;CA4130;CaO19.4245;IPF20009]
Cal505440W	orf19.4261	1.185	1.87	1.5275	Putative translation initiation factor; genes encoding ribosomal subunits, translation factors, and tRNA synthetases are downregulated upon phagocytosis by murine macrophage; Uncharacterized [orf19.4261;orf19.4261;orf19.11737;IPF15194.3;IPF28461.1;orf6.1736;CA0667;CaO19.4261;CaO19.11737;IPF15194.2]
Cal505420C	orf19.4261	0.898	1.468	1.183	Putative translation initiation factor; genes encoding ribosomal subunits, translation factors, and tRNA synthetases are downregulated upon phagocytosis by murine macrophage; Uncharacterized [orf19.4261;orf19.4261;orf19.11737;IPF15194.3;IPF28461.1;orf6.1736;CA0667;CaO19.4261;CaO19.11737;IPF15194.2]
Cal505660C	orf19.4273	0.901	1.586	1.2435	Predicted ORF in Assemblies 19, 20 and 21; Uncharacterized [orf19.4273;orf19.4273;orf19.11749;IPF22931.1;IPF16549.2;Contig4-2872_0001;orf6.3484;CA1819;CaO19.11749;CaO19.4273;IPF16549]
Cal505710W	orf19.4274	1.593	2.159	1.876	Alkaline upregulated by Rim101p; Uncharacterized [orf19.4274;orf19.4274;orf19.11750;IPF22968.1;IPF8739.2;Contig4-2872_0006;orf6.3112;orf6.3483;CA1552;CaO19.4274;IPF8739.1]
Cal505740W	orf19.4275	1.317	1.712	1.5145	Protein involved in regulation of DNA-damage-induced filamentous growth; putative component of DNA damage checkpoint; ortholog of <i>S. cerevisiae</i> Rad9p; transcription is induced in response to alpha pheromone in SpiderM medium; Verified [orf19.4275;orf19.4275;orf19.11751;orf19.11752;IPF22941.1;IPF22987.1;IPF8741.1;IPF8742.1;Contig4-2872_0008;orf6.3111;orf6.3110;CA1551;CA1550;orf19.4276;IPF87…
Cal506340W	orf19.4311	0.835	1.468	1.1515	Nucleoside diphosphate kinase (NDP kinase); homo-hexameric; soluble protein in hyphae; flucytosine induced; biofilm induced; macrophage-induced protein; Verified [orf19.4311;orf19.4311;orf19.11786;IPF18653.1;IPF2914.1;Contig4-2902_0014;orf6.3163;orf6.4616;CA2645;CaO19.4311]
Cal506380W	orf19.4315,orf19.4316	0.647	1.393	1.02	Ortholog(s) have Rab GTPase activator activity, role in vesicle-mediated transport and intracellular localization :: Trimethyllysine dioxygenase, the first enzyme in the carnitine biosynthesis pathway; hypha-induced expression, regulated by Cyr1, Ras1, Efg1; rat catheter biofilm repressed
Cal506740W	orf19.4336	1.337	2.175	1.756	Predicted ribosomal protein; macrophage/pseudohyphal-induced after 16 h; genes encoding cytoplasmic ribosomal subunits, translation factors, and tRNA synthetases are downregulated upon phagocytosis by murine macrophage; Verified [orf19.4336;orf19.4336;orf19.11812;IPF11696.1;IPF28464.1;Contig4-2570_0018;orf6.1675;CA0632;CaO19.11812;CaO19.4336]
CalR08520C	orf19.4375.1	1.133	1.867	1.5	ORF Predicted by Annotation Working Group; putative 40S ribosomal protein S30; shows colony morphology-related gene regulation by Ssn6p; Uncharacterized [orf19.4375.1;orf19.4375.1;IPF22874.1;IPF15100.2;Contig4-2849_0014;CA2587;RPS30.3]
CalR07810W	orf19.4392	0.66	1.433	1.0465	Predicted ORF in Assemblies 19, 20 and 21; alpha-factor induced; Uncharacterized [orf19.4392;orf19.4392;orf19.11870;IPF22875.1;IPF3293.2;Contig4-3077_0014;orf6.6315;CA3910;CaO19.4392;CaO19.11870;IPF3293]
Cal413360W	orf19.4405	1.219	2.134	1.6765	Putative dual specificity protein phosphatase, similar to <i>S. cerevisiae</i> Pps1p; mutant shows virulence defect; Uncharacterized [orf19.4405;orf19.4405;orf19.11883;IPF22864.1;IPF11842.2;Contig4-2866_0017;orf6.2823;CA1359;CaO19.11883;CaO19.4405;IPF11842]
Cal116740W	orf19.4432	1.009	1.434	1.2215	Predicted ORF in Assemblies 19, 20 and 21; mutation confers hypersensitivity to amphotericin B; Verified [orf19.4432;orf19.4432;orf19.11910;IPF22791.1;IPF5540.2;Contig4-2969_0018;orf6.2723;CA1288;CaO19.11910;CaO19.4432]
Cal116680C	orf19.4436,orf19.4435	0.976	1.665	1.3205	Ortholog(s) have structural constituent of cytoskeleton activity, role in microtubule nucleation and spindle pole body localization
Cal108640W	orf19.4457	0.567	1.444	1.0055	Protein required for wild-type cell wall chitin distribution, morphology, hyphal growth; not essential; similar to S. cerevisiae Bni4p (targeting subunit for Glc7p phosphatase, involved in bud-neck localization of chitin synthase III); Verified [orf19.4457;orf19.4457;orf19.11937;orf6.2835;IPF22779.1;IPF11847.2;Contig4-2719_0011;CA1366;CaO19.4457;CaO19.11937;IPF11847]
Cal111730W	orf19.446.2	0.208	3.718	1.963	Predicted ORF in Assembly 20 and 21; gene has intron; Uncharacterized [orf19.446.2;orf19.446.2;CA0668;IPF18910.3f]
Cal108950W	orf19.4474	0.808	1.289	1.0485	Protein not essential for viability; Uncharacterized [orf19.4474;orf19.4474;orf19.11954;IPF14379;IPF22775.1;IPF14379.2;orf6.4313;CA2419;CaO19.4474;CaO19.11954]
Cal109080W	orf19.4479	0.867	1.455	1.161	Predicted ORF in Assemblies 19, 20 and 21; downregulated during core stress response; Uncharacterized [orf19.4479;orf19.4479;orf19.11959;orf19.11960;IPF22770.1;IPF22776.1;IPF13757.2;IPF13756.2;Contig4-2664_0018;Contig4-2664_0021;orf6.4308;orf6.4307;CA2414;CA2413;orf19.4480;IPF13756.3f]
Cal111700W	orf19.448	0.774	1.334	1.054	Predicted ORF in Assemblies 19, 20 and 21; Uncharacterized [orf19.448;orf19.448;orf19.8078;IPF18257.2;IPF5918.2;Contig4-2840_0014;orf6.1738;orf6.6516;CA0669;CaO19.448;IPF5918]
Cal210370C	orf19.4490	1.175	1.893	1.534	Predicted ribosomal protein; mutation confers hypersensitivity to 5-FU, tubercidin (7-deazaadenosine); genes encoding cytoplasmic ribosomal subunits, translation factors, and tRNA synthetases are downregulated on phagocytosis by macrophage; Verified [orf19.4490;orf19.4490;RPL17;orf19.11966;IPF22753.1;IPF4772.1;Contig4-2993_0002;orf6.2951;CA1440;CaO19.4490;CaO19.11966]
Cal104390C	orf19.4525	2.191	4.013	3.102	Predicted ORF in Assemblies 19, 20 and 21; Uncharacterized [orf19.4525;orf19.4525;orf19.12000;IPF22719.1;IPF9977.2;Contig4-2702_0011;orf6.3046;CA1508;CaO19.12000;CaO19.4525;IPF9977]
Cal609250W	orf19.4553	1.253	1.291	1.272	Predicted ORF in Assemblies 19, 20 and 21; Uncharacterized [orf19.4553;orf19.4553;IPF13815.2;Contig4-2587_0013;orf6.3072;CA1526;CaO19.4553;IPF13815]
Cal404500W	orf19.4589	0.889	1.477	1.183	Predicted ORF in Assemblies 19, 20 and 21; Uncharacterized [orf19.4589;orf19.4589;FMS1;orf19.12058;IPF22588.1;IPF1011.1;Contig4-3104_0039;orf6.7888;CA5150;CaO19.12058;CaO19.4589]
Cal404120W	orf19.4606:orf19.4605	0.596	1.569	1.0825	Putative phosphomevalonate kinase; enzyme of the mevalonate pathway of isoprenoid biosynthesis; transcript regulated by Nrg1; possible drug target; not conserved in H. sapiens :: Putative prepephenate dehydrogenase; enzyme of tyrosine biosynthesis; fungal-specific (no human or murine homolog)
Cal403780C	orf19.4623,orf19.4622	0.924	1.227	1.0755	:: Ortholog(s) have role in telomere maintenance, transcription-coupled nucleotide-excision repair, ubiquitin-dependent protein catabolic process and nucleus localization
Cal403480W	orf19.4629	0.931	1.575	1.253	Predicted ORF in Assemblies 19, 20 and 21; Uncharacterized [orf19.4629;orf19.4629;BUL1;orf19.12099;IPF9241.2;IPF18129.1;Contig4-2953_0001;Contig4-2953_0002;orf6.2052;orf6.7928;CA0873;CaO19.4629]
Cal403470W	orf19.4629	1.017	1.481	1.249	Predicted ORF in Assemblies 19, 20 and 21; Uncharacterized [orf19.4629;orf19.4629;BUL1;orf19.12099;IPF9241.2;IPF18129.1;Contig4-2953_0001;Contig4-2953_0002;orf6.2052;orf6.7928;CA0873;CaO19.4629]
Cal403460C	orf19.4629	0.693	1.393	1.043	Predicted ORF in Assemblies 19, 20 and 21; Uncharacterized [orf19.4629;orf19.4629;BUL1;orf19.12099;IPF9241.2;IPF18129.1;Contig4-2953_0001;Contig4-2953_0002;orf6.2052;orf6.7928;CA0873;CaO19.4629]
Cal403420W	orf19.4631	2.504	2.862	2.683	Predicted ORF in Assemblies 19, 20 and 21; ketoconazole-induced; amphotericin B, caspofungin repressed; Uncharacterized [orf19.4631;orf19.4631;ERG252;orf19.12101;IPF8993.1;IPF18887.2;Contig4-2825_0017;orf6.1843;orf6.2054;CA0875;CaO19.4631]
Cal403380C	orf19.4632	1.162	2.044	1.603	Predicted ribosomal protein; genes encoding cytoplasmic ribosomal subunits, translation factors, and tRNA synthetases are downregulated upon phagocytosis by murine macrophage; intron in 5'-UTR; Uncharacterized [orf19.4632;orf19.4632;RPL20;orf19.12102;IPF22642.1;IPF8994.2;Contig4-2825_0015;orf6.1842;CA0736;CaO19.4632]
Cal403390W	orf19.4632	1.081	1.789	1.435	Predicted ribosomal protein; genes encoding cytoplasmic ribosomal subunits, translation factors, and tRNA synthetases are downregulated upon phagocytosis by murine macrophage; intron in 5'-UTR; Uncharacterized [orf19.4632;orf19.4632;RPL20;orf19.12102;IPF22642.1;IPF8994.2;Contig4-2825_0015;orf6.1842;CA0736;CaO19.4632]
Cal403330W	orf19.4635	0.932	1.117	1.0245	Putative translation initiation factor; mutation confers hypersensitivity to roridin A and verrucarin A; genes encoding ribosomal subunits, translation factors, and tRNA synthetases are downregulated upon phagocytosis by murine macrophage; Verified [orf19.4635;orf19.4635;orf19.12105;IPF22546.1;IPF8998.2;Contig4-2825_0008;orf6.1839;orf6.2373;CA0733;CaO19.4635]
Cal403260C	orf19.4640	3.173	2.622	2.8975	Predicted ORF in Assemblies 19, 20 and 21; downregulated in core stress response; Uncharacterized [orf19.4640;orf19.4640;orf19.12110;IPF15595.2;IPF28303.1;Contig4-2596_0001;orf6.2368;CA1064]
Cal403250W	orf19.4641	1.248	1.929	1.5885	Myristoyl-CoA:protein N-myristoyltransferase; attaches the fatty acid myristate to a small number of proteins at an N-terminal Gly; essential; antifungal drug target; functional homolog of S. cerevisiae Nmt1p; Verified [orf19.4641;orf19.4641;orf19.12111;NMT;IPF22592.1;IPF15592.2;Contig4-2596_0003;orf6.2367;CA1063;CaO19.4641;CaO19.12111]
Cal403230C	orf19.4642	0.987	1.758	1.3725	Predicted ORF in Assemblies 19, 20 and 21; Uncharacterized [orf19.4642;orf19.4642;orf19.12112;IPF22602.1;IPF14165.2;Contig4-2596_0004;orf6.2366;CA1062;CaO19.4642;CaO19.12112;IPF14165]
Cal403200W	orf19.4643	2.307	2.978	2.6425	Predicted ORF in Assemblies 19, 20 and 21; Uncharacterized [orf19.4643;orf19.4643;orf19.12113;IPF19720.2;IPF28308.1;Contig4-2362_0003;Contig4-2596_0007;Contig4-2596_0008;orf6.1491;orf6.2365;CA1061;CaO19.4643;IPF19720;IPF19720.3eoc;IPF19720.1]
Cal403120W	orf19.4647	1.128	2.073	1.6005	Protein described as similar to CCAAT-binding transcription factor that regulates respiration; expression greater in low iron; transcription is opaque specific, alkaline upregulated, ciclopirox olamine induced; Uncharacterized [orf19.4647;orf19.4647;HAP32;orf19.12116;orf6.3344;IPF22615.1;IPF9315.2;Contig4-1826_0002;CA1717;CaO19.4647;CaO19.12116;IPF9315]
Cal403060W	orf19.4650	0.761	1.418	1.0895	Putative regulatory subunit of acetolacetate synthase ; fungal-specific (no human or murine homolog); alkaline upregulated; regulated by Gcn2p and Gcn4p; Uncharacterized [orf19.4650;orf19.4650;orf19.12119;IPF9306.1;IPF15583.2;Contig4-2275_0003;orf6.304;orf6.3347;CA1719;CaO19.4650]
Cal403030W	orf19.4651	0.761	1.43	1.0955	Putative GPI-anchored protein of unknown function; greater mRNA abundance observed in a cyr1 homozygous null mutant than in wild type; Uncharacterized [orf19.4651;orf19.4651;orf19.12120;IPF15581.2;IPF9303.2;Contig4-2275_0007;orf6.305;orf6.3348;CA1720;CaO19.4651;IPF15581]
Cal402960W	orf19.4656	0.994	1.847	1.4205	Predicted ORF in Assemblies 19, 20 and 21; Uncharacterized [orf19.4656;orf19.4656;orf19.12126;IPF22567.1;IPF12195.2;Contig4-2565_0001;Contig4-2565_0002;orf6.4707;CA2704;CaO19.12126;CaO19.4656;IPF12195]
Cal402860W	orf19.4660	0.895	1.549	1.222	Predicted ribosomal protein; similar to ribosomal protein S10; localizes to cell surface of yeast-form cells, but not hyphal cells; genes encoding cytoplasmic ribosomal subunits are downregulated upon phagocytosis by murine macrophage; Verified [orf19.4660;orf19.4660;orf19.12130;orf6.4711;IPF22630.1;IPF11001.1;RPS6B;Contig4-2819_0006;CA2708]
Cal402830W	orf19.4662	0.653	1.455	1.054	Putative transcription factor; required for wild-type resistance to cell wall perturbation, caspofungin treatment; regulates caspofungin induction of PGA13; Verified [orf19.4662;orf19.4662;orf19.12132;IPF22573.1;IPF4828.2;Contig4-2819_0007;orf6.4713;CA2709;CaO19.12132;CaO19.4662;IPF4828]
Cal402240W	orf19.4689	0.706	1.334	1.02	Putative GPI-anchored protein of unknown function; Uncharacterized [orf19.4689;orf19.4689;orf19.12158;IPF14121.2;IPF19267.2;Contig4-2733_0002;orf6.1769;orf6.461;CA6322;CaO19.4689]
Cal402150W	orf19.4697	1.402	1.999	1.7005	Protein induced during the mating process; Uncharacterized [orf19.4697;orf19.4697;orf19.12167;IPF22610.1;IPF11189.3;Contig4-1657_0002;Contig4-1657_0003;Contig4-2496_0003;orf6.1058;orf6.1684;orf6.1709;orf6.759;CA0283;CaO19.4697;IPF18034;IPF18034.2]
Cal402130W	orf19.4698	1.509	1.994	1.7515	Predicted type 2C protein phosphatase, serine/threonine-specific; required for hyphal growth; induced under stress; Verified [orf19.4698;orf19.4698;DHP99;orf19.12168;IPF22595.1;IPF15977.2;orf6.1685;CA0641;CaO19.12168;CaO19.4698;IPF15977]
Cal402060W	orf19.4701	0.698	1.349	1.0235	Predicted ORF in Assemblies 19, 20 and 21; Uncharacterized [orf19.4701;orf19.4701;orf19.12171;IPF14514.1;IPF16375.2;orf6.1754;orf6.3520;CA0682;CaO19.4701;IPF14514]
Cal119930C	orf19.4736	0.24	1.794	1.017	Predicted ORF in Assemblies 19, 20 and 21; Uncharacterized [orf19.4736;orf19.4736;orf19.12198;IPF22412.1;IPF19888.1;Contig4-2643_0008;Contig4-2643_0009;orf6.2087;CA0892;CaO19.4736;CaO19.12198;PHO8.5]
Cal120190C	orf19.4750	0.712	1.506	1.109	Predicted ORF in Assemblies 19, 20 and 21; Uncharacterized [orf19.4750;orf19.4750;orf19.12212;IPF16404.3;IPF13919.2;Contig4-2151_0001;orf6.4020;orf6.88;CA2212;CaO19.4750;IPF13919]
Cal120210W	orf19.4751	0.849	1.507	1.178	Predicted ORF in Assemblies 19, 20 and 21; Uncharacterized [orf19.4751;orf19.4751;RSM25;orf19.12214;IPF22488.1;IPF16405.2;Contig4-1898_0001;orf6.4021;orf6.89;CA2213;CaO19.4751;IPF16405]
Cal120450W	orf19.4757	0.822	1.424	1.123	Predicted ORF in Assemblies 19, 20 and 21; induced by nitric oxide; oxidative stress-induced via Cap1p; Uncharacterized [orf19.4757;orf19.4757;orf19.12221;IPF22395.1;IPF14388.2;Contig4-2557_0009;Contig4-2557_0010;orf6.4598;CA2632;CaO19.12221;CaO19.4757]
Cal120520C	orf19.4760	0.921	1.752	1.3365	Predicted ORF in Assemblies 19, 20 and 21; Uncharacterized [orf19.4760;orf19.4760;orf19.12224;IPF18440.1;IPF10911.2;Contig4-2557_0004;orf6.179;orf6.4595;CA2629;CaO19.4760;IPF10911]
Cal120570W	orf19.4763:orf19.4764	1.704	2.1	1.902	Protein of unknown function; possibly membrane bound; mutants are viable; rat catheter biofilm repressed :: Ortholog(s) have poly(A)-specific ribonuclease activity, role in mRNA 3'-end processing, postreplication repair and PAN complex localization
Cal122150C	orf19.4833	0.72	1.987	1.3535	Malate synthase; enzyme of the glyoxylate cycle; peroxisomal; no mammalian homolog; transcription is induced upon phagocytosis by macrophage; regulated upon white-opaque switching; biofilm-repressed; strong oxidative stress induced; Verified [orf19.4833;orf19.4833;orf19.12296;IPF22415.1;IPF4483.1;Contig4-3078_0024;orf6.7378;CA4748;CaO19.12296;CaO19.4833]
Cal122930C	orf19.4870	0.792	1.417	1.1045	Predicted ORF in Assemblies 19, 20 and 21; decreased expression in response to prostaglandins; Uncharacterized [orf19.4870;orf19.4870;orf19.12334;IPF10215.2;IPF17356.3;Contig4-2619_0001;Contig4-2622_0005;orf6.2585;orf6.3829;CA1202;CaO19.4870]
Cal123020W	orf19.4873	0.759	1.364	1.0615	Predicted ORF in Assemblies 19, 20 and 21; expression is regulated upon white-opaque switching; Uncharacterized [orf19.4873;orf19.4873;orf19.12337;IPF17929.2;IPF13352.1;Contig4-2619_0010;orf6.113;orf6.3832;CA2078;CaO19.4873;IPF13352]
CalR09190W	orf19.489:orf19.490	0.754	1.406	1.08	Similar to mammalian membrane-associated progesterone receptors involved in DNA damage response; induced in core stress response; Hog1 regulated; clade-associated expression; Hap43-repressed
Cal123740W	orf19.4903	1.272	1.948	1.61	Predicted ORF in Assemblies 19, 20 and 21; Uncharacterized [orf19.4903;orf19.4903;GPI12;orf19.12368;IPF8860.1;IPF28257.1;Contig4-2762_0010;orf6.1620;CA0594;CaO19.12368;CaO19.4903;IPF8860]
Cal123900C	orf19.4909.1	1.317	2.004	1.6605	ORF Predicted by Annotation Working Group; shows colony morphology-related gene regulation by Ssn6p; Uncharacterized [orf19.4909.1;orf19.4909.1;IPF22520.1;IPF9613.2;Contig4-2508_0008;CA2023;RPL42.3]
Cal129800W	orf19.4929	1.131	1.645	1.388	Predicted ORF in Assemblies 19, 20 and 21; Uncharacterized [orf19.4929;orf19.4929;orf19.12395;IPF22332.1;IPF19785.1;Contig4-2999_0001;Contig4-2999_0002;orf6.5909;CA3599;CaO19.4929;CaO19.12395;IPF19785]
CalR09270C	orf19.493	1.498	2.336	1.917	Putative ribosomal protein; genes encoding cytoplasmic ribosomal subunits, translation factors, and tRNA synthetases are downregulated upon phagocytosis by murine macrophage; transcription is positively regulated by Tbf1p; Uncharacterized [orf19.493;orf19.493;RPL15;orf19.8123;IPF8963.2;IPF15914.3;RPL15B;Contig4-2904_0008;orf6.269;orf6.7078;CA0042;CaO19.493;CA4512]
Cal129860W	orf19.4931	0.703	1.33	1.0165	Putative tRNA-Cys synthetase; genes encoding ribosomal subunits, translation factors, and tRNA synthetases are downregulated upon phagocytosis by murine macrophage; transcription is induced in response to alpha pheromone in SpiderM medium; Uncharacterized [orf19.4931;orf19.4931;orf19.12397;IPF22211.1;IPF15618.2;Contig4-2611_0003;Contig4-2611_0004;orf6.5911;YNL247WA;CA3601;CaO19.12397;CaO19.4931;I…
Cal129890W	orf19.4931.1	0.803	1.791	1.297	ORF Predicted by Annotation Working Group; Uncharacterized [orf19.4931.1;orf19.4931.1;IPF22199.1;IPF12937.2;Contig4-2611_0007;CA3602;RPL14B;RPL14B.3]
Cal129900C	orf19.4932	0.705	1.315	1.01	Predicted ORF in Assemblies 19, 20 and 21; Uncharacterized [orf19.4932;orf19.4932;MEF1;orf19.12398;IPF22213.1;IPF12940.2;Contig4-2611_0010;orf6.5912;CA3603;CaO19.12398;CaO19.4932]
Cal130250C	orf19.4950	0.78	1.312	1.046	Ankyrin-repeat protein; increased transcription is observed upon fluphenazine treatment; Uncharacterized [orf19.4950;orf19.4950;orf19.12414;IPF22207.1;IPF5675.1;Contig4-2994_0019;orf6.2433;CA1102;CaO19.4950;CaO19.12414]
Cal130330W	orf19.4952	0.87	1.299	1.0845	Predicted ORF in Assemblies 19, 20 and 21; Uncharacterized [orf19.4952;orf19.4952;orf19.12417;IPF5681.2;IPF19696.1;Contig4-1718_0002;orf6.1485;orf6.2430;CA1100;CaO19.4952;IPF5681]
Cal130610C	orf19.4962	1.869	2.486	2.1775	Predicted ORF in Assemblies 19, 20 and 21; Uncharacterized [orf19.4962;orf19.4962;orf19.12427;IPF22269.1;IPF19731.1;Contig4-1523_0004;Contig4-2827_0019;orf6.2843;CA1371;CaO19.12427;CaO19.4962;IPF19731]
Cal131330W	orf19.5004	1.514	2.349	1.9315	Protein similar to S. cerevisiae Rad54p, which is a DNA-dependent ATPase involved in DNA repair; induced under hydroxyurea treatment; Uncharacterized [orf19.5004;orf19.5004;orf19.12471;IPF22209.1;IPF1807.1;Contig4-3061_0018;orf6.8005;CA5260;CaO19.5004;CaO19.12471]
Cal131480C	orf19.5010	0.884	1.351	1.1175	Protein likely to be essential for growth, based on an insertional mutagenesis strategy; similar to S. cerevisiae Dim1p, which is an 18S rRNA dimethylase involved in rRNA modification and processing; induced upon biofilm formation; Uncharacterized [orf19.5010;orf19.5010;orf19.12477;IPF22277.1;IPF1822.1;Contig4-3061_0009;orf6.7999;CA5252;CaO19.5010;CaO19.12477]
Cal131870W	orf19.5026	1.311	1.476	1.3935	Putative transcription factor with zinc finger DNA-binding motif; Uncharacterized [orf19.5026;orf19.5026;ZMS1;orf19.12493;IPF22331.1;IPF3021.1;Contig4-3075_0021;orf6.7983;CA5237;CaO19.5026;CaO19.12493]
Cal132000W	orf19.5032	0.575	1.444	1.0095	Protein involved in cell wall maintenance, redundant with Sun41p; described as a DNA replication regulator; produced under vaginal conditions; macrophage-downregulated gene; transcription is negatively regulated by Rim101p, Cyr1p, Ras1p; Verified [orf19.5032;orf19.5032;SUN42;UTH1;orf19.12499;IPF22273.1;IPF10421.1;Contig4-2686_0006;orf6.7977;CA5232;CaO19.5032;CaO19.12499]
Cal408660W	orf19.5041	0.945	1.957	1.451	Predicted ORF in Assemblies 19, 20 and 21; Uncharacterized [orf19.5041;orf19.5041;orf19.12508;IPF22189.1;IPF19742.1;Contig4-2272_0004;orf6.3318;CA6218;CaO19.5041;CaO19.12508;IPF19742]
Cal408740W	orf19.5046	0.751	1.456	1.1035	Protein that acts in prenylation; transcription is alpha-factor induced; regulated in response to lovastatin and fluconazole; Uncharacterized [orf19.5046;orf19.5046;orf19.12513;IPF22187.1;IPF19534.2;Contig4-2773_0012;orf6.3323;CA1700;CaO19.5046;RAM1.5f;CA1699;RAM1.3f;IPF19535.1;IPF19534.1]
Cal117710C	orf19.5049	0.461	1.786	1.1235	Predicted ORF in Assemblies 19, 20 and 21; induced upon biofilm formation; Uncharacterized [orf19.5049;orf19.5049;orf19.12516;IPF22145.1;IPF10884.1;Contig4-2722_0002;orf6.3387;CA1747;CaO19.5049;CaO19.12516;IPF10884]
CalR09450W	orf19.506	0.742	1.366	1.054	Predicted ORF in Assemblies 19, 20 and 21; heavy metal (cadmium) stress-induced; Uncharacterized [orf19.506;orf19.506;orf19.8136;IPF10391.1;IPF29798.1;Contig4-2663_0001;orf6.7065;CA4502;CaO19.506;IPF10391]
Cal117920W	orf19.5063	0.937	1.812	1.3745	Predicted ORF in Assemblies 19, 20 and 21; ciclopirox olamine induced; regulated by Ssn6p; induced by nitric oxide in yhb1 mutant; Uncharacterized [orf19.5063;orf19.5063;orf19.12529;IPF17932.1;IPF13493.1;Contig4-1378_0002;Contig4-1944_0005;orf6.1609;orf6.468;CA0586;CaO19.5063;IPF13493]
Cal707150W	orf19.5126	0.766	1.503	1.1345	Predicted ORF in Assemblies 19, 20 and 21; Uncharacterized [orf19.5126;orf19.5126;orf19.12591;orf19.12593;IPF22069.1;IPF14561.3;IPF14556.2;IPF14559.1;Contig4-1627_0002;Contig4-1627_0005;orf6.37;orf6.3405;orf6.3403;CA1758;CA1757;CaJ7.0377;CaJ7.0378;orf19.5128;IPF14559.3f]
Cal707140C	orf19.5126	0.689	1.469	1.079	Predicted ORF in Assemblies 19, 20 and 21; Uncharacterized [orf19.5126;orf19.5126;orf19.12591;orf19.12593;IPF22069.1;IPF14561.3;IPF14556.2;IPF14559.1;Contig4-1627_0002;Contig4-1627_0005;orf6.37;orf6.3405;orf6.3403;CA1758;CA1757;CaJ7.0377;CaJ7.0378;orf19.5128;IPF14559.3f]
Cal128420C	orf19.5225.2	1.167	1.737	1.452	Predicted ribosomal protein; Uncharacterized [orf19.5225.2;orf19.5225.2;IPF19343.2;IPF10412.2;CA1972]
Cal128040W	orf19.5242	0.778	1.572	1.175	Predicted ORF in Assemblies 19, 20 and 21; member of conserved Mcm1p regulon; Uncharacterized [orf19.5242;orf19.5242;orf19.12707;IPF2017.3;IPF28100.1;Contig4-3067_0020;orf6.769;orf6.7700;CA6297;CDC62.3f;CA0178;IPF2017.2]
Cal127420W	orf19.5277:orf19.5276	2.641	3.98	3.3105	Putative nuclear pore-associated protein; Hap43p-induced gene; induced upon low-level peroxide stress; possibly an essential gene, disruptants not obtained by UAU1 method
CalR12110W	orf19.5286	1.212	3.846	2.529	Putative flavodoxin; fungal-specific (no human or murine homolog); Uncharacterized [orf19.5286;orf19.5286;IPF27466.1;Contig4-2561_0001;CA6240;CaO19.5286]
CalR11990W	orf19.5288.1	0.758	1.458	1.108	ORF added to Assembly 21 based on comparative genome analysis; Uncharacterized [orf19.5288.1;orf19.5288.1]
Cal409270C	orf19.5297	0.753	1.464	1.1085	Predicted ORF in Assemblies 19, 20 and 21; Uncharacterized [orf19.5297;orf19.5297;TFB1;orf19.12756;IPF21837.1;IPF19753.1;Contig4-2961_0028;Contig4-2961_0029;orf6.3937;CA2159;CaO19.12756;CaO19.5297;IPF19753]
Cal409240W	orf19.5299,orf19.5299.1	0.744	1.525	1.1345	Putative pre-ribosomal factor; decreased mRNA abundance observed in cyr1 homozygous mutant hyphae; induced by heavy metal (cadmium) stress; Hog1p regulated
Cal409150W	orf19.5303	1.476	1.251	1.3635	Putative GPI-anchored protein of cell wall; Verified [orf19.5303;orf19.5303;LDG6;orf19.12763;IPF21868.1;IPF8532.2;Contig4-2961_0012;orf6.8292;CA5475;CaO19.5303;CaO19.12763;IPF8532]
CalR09920W	orf19.532	0.718	1.313	1.0155	Cell wall protein; expression is repressed by Rim101p; expression is regulated upon white-opaque switching; transcription is repressed in response to alpha pheromone in SpiderM medium; macrophage-induced gene; Uncharacterized [orf19.532;orf19.532;PGA21;orf19.8165;orf6.6744;IPF26816.1;IPF4303.2;Contig4-2736_0002;CA4245;CaO19.532;IPF4303]
Cal223780W	orf19.5338	0.681	1.389	1.035	Putative transcription factor with zinc cluster DNA-binding motif; ortholog of S. cerevisiae Gal4p, but is not involved in the regulation of galactose utilization genes; caspofungin repressed; Verified [orf19.5338;orf19.5338;orf19.12798;IPF21869.1;IPF776.1;Contig4-3102_0054;orf6.8327;CA5497;CaO19.5338;CaO19.12798;IPF776]
Cal223850C	orf19.5342	1.056	1.626	1.341	Predicted ORF in Assemblies 19, 20 and 21; fungal-specific (no human or murine homolog); Uncharacterized [orf19.5342;orf19.5342;orf19.12802;IPF21840.1;IPF768.1;Contig4-3102_0049;orf6.8331;CA5500;CaO19.12802;CaO19.5342;IPF768]
Cal301740C	orf19.5376	1.403	1.76	1.5815	Predicted ORF in Assemblies 19, 20 and 21; Uncharacterized [orf19.5376;orf19.5376;orf19.12831;IPF16051.2;IPF21697.1;IPF28022.1;Contig4-2974_0004;orf6.1589;orf6.4138;CA0577;orf19.3068;CaO19.5376;CaO19.12831]
Cal301200W	orf19.5407	1.017	1.826	1.4215	Predicted ORF in Assemblies 19, 20 and 21; Uncharacterized [orf19.5407;orf19.5407;SOF1;orf19.12862;IPF21734.1;IPF1095.1;Contig4-3071_0003;orf6.8643;CA5765;CaO19.12862;CaO19.5407]
Cal300210C	orf19.5465	1.129	1.71	1.4195	Predicted ORF in Assemblies 19, 20 and 21; Uncharacterized [orf19.5465;orf19.5465;YJU2;orf19.12920;IPF21752.1;IPF4149.1;Contig4-3013_0009;orf6.8701;CA5806;CaO19.5465;CaO19.12920;IPF4149]
Cal300200W	orf19.5466	1.445	2.219	1.832	Predicted ribosomal protein; hyphal downregulated; genes encoding cytoplasmic ribosomal subunits, translation factors, and tRNA synthetases are downregulated upon phagocytosis by murine macrophage; transcription activated by Tbf1p; Uncharacterized [orf19.5466;orf19.5466;orf19.12921;IPF21774.1;IPF4146.1;RPS24A;Contig4-3013_0008;orf6.8702;CA5807;CaO19.5466;CaO19.12921]
Cal606920C	orf19.5595	0.807	1.483	1.145	Predicted ORF in Assemblies 19, 20 and 21; Uncharacterized [orf19.5595;orf19.5595;SHE3;orf19.13040;IPF16588.3;IPF6796.2;Contig4-2698_0002;orf6.4437;CA2505;CaO19.13040;CaO19.5595;IPF6796]
Cal501590W	orf19.570	1.312	1.876	1.594	Putative GPI-anchored protein of unknown function; decreased transcription is observed in an azole-resistant strain that overexpresses MDR1; Uncharacterized [orf19.570;orf19.570;orf19.8201;Contig4-2860_0006;IPF26693.1;IPF11578.2;orf6.4720;CA2713;CaO19.8201;CaO19.570]
Cal607650W	orf19.5701	1.457	1.958	1.7075	Predicted ORF in Assemblies 19, 20 and 21; Uncharacterized [orf19.5701;orf19.5701;orf19.13076;orf19.13124;IPF18416.1;IPF27982.1;IPF21471.1;IPF8472.2;orf6.4790;orf6.4631;CA2766;CA2653;orf19.5631;CaO19.13124;CaO19.5701;IPF8472.3eoc]
Cal607720W	orf19.5711	0.646	1.617	1.1315	Predicted ORF in Assemblies 19, 20 and 21; Uncharacterized [orf19.5711;orf19.5711;CSR1;orf19.13134;IPF16951.2;IPF8105.1;Contig4-2608_0003;orf6.4641;orf6.532;CA2658;CaO19.5711;IPF8105]
Cal608060W	orf19.5728	0.945	1.423	1.184	Predicted ORF in Assemblies 19, 20 and 21; Uncharacterized [orf19.5728;orf19.5728;ALK1;orf19.13150;IPF12980.3;IPF13156.2;Contig4-3044_0016;orf6.4907;CA2843;CaO19.5728;ALK5.5f]
Cal608430C	orf19.5751	0.847	1.501	1.174	Predicted ORF in Assemblies 19, 20 and 21; mutation confers hypersensitivity to aureobasidin A; Verified [orf19.5751;orf19.5751;orf19.13174;IPF21473.1;IPF13514.2;Contig4-2419_0002;orf6.2090;CA0894;CaO19.13174;CaO19.5751]
Cal206930W	orf19.5788	1.039	1.972	1.5055	Elongation Factor 2 (eEF2); GTPase; essential; highly expressed; target of sordarin antifungals; antigenic in human, mouse; lacks site for regulatory phosphorylation by eEF2 kinase; GCN-regulated; complements S. cerevisiae eft1 eft2 mutant; Verified [orf19.5788;orf19.5788;orf19.13210;IPF17326.3;IPF6840.1;EFT2-1;Contig4-2708_0006;orf6.4860;orf6.6622;CA2810]
Cal205990W	orf19.5832	0.763	1.447	1.105	Protein abundance is affected by URA3 expression in the CAI-4 strain background; Uncharacterized [orf19.5832;orf19.5832;orf19.13254;IPF21416.1;IPF14266.2;Contig4-1905_0001;orf6.6146;CA3787;CaO19.5832;CaO19.13254]
Cal309470W	orf19.5859	0.652	1.366	1.009	Putative allantoate permease; fungal-specific (no human or murine homolog); Uncharacterized [orf19.5859;orf19.5859;DAL53;orf19.13281;IPF21202.1;IPF8598.2;Contig4-1908_0004;orf6.5051;CA2957;CaO19.5859]
Cal309700W	orf19.5869	0.744	1.36	1.052	Predicted ORF in Assemblies 19, 20 and 21; Uncharacterized [orf19.5869;orf19.5869;BSD2;orf19.13290;IPF18047.2;IPF15266.1;Contig4-1864_0002;orf6.9168;orf6.970;CA0243]
Cal310210C	orf19.5904	1.351	2.096	1.7235	Predicted ribosomal protein; genes encoding cytoplasmic ribosomal subunits, translation factors, and tRNA synthetases are downregulated upon phagocytosis by murine macrophage; Uncharacterized [orf19.5904;orf19.5904;orf19.13325;IPF21264.1;IPF1881.1;RPL19B;Contig4-2874_0011;orf6.9133;CA6141;RPL19A.3]
Cal310490W	orf19.5919	1.847	2.19	2.0185	Protein similar to <i>A. nidulans</i> MesA, which is involved in localization of actin cables; Uncharacterized [orf19.5919;orf19.5919;orf19.13340;IPF21186.1;IPF152.2;orf6.9118;CA6128;CaO19.5919;CaO19.13340;IPF152]
Cal310630W	orf19.5926	1.306	1.668	1.487	Protein induced during the mating process; Uncharacterized [orf19.5926;orf19.5926;ORT1;orf19.13347;IPF18052.2;IPF137.1;Contig4-2867_0013;orf6.9111;CA6124;CaO19.13347;CaO19.5926]
Cal310640C	orf19.5927	0.503	1.551	1.027	Putative ribosomal protein; macrophage/pseudohyphal-induced after 16 h; genes encoding cytoplasmic ribosomal subunits, translation factors, and tRNA synthetases are downregulated upon phagocytosis by murine macrophage; Uncharacterized [orf19.5927;orf19.5927;orf19.13348;IPF21299.1;IPF135.1;Contig4-2867_0011;Contig4-2867_0012;orf6.9110;CA6123;RPS15.3]
Cal310670C	orf19.5929	0.966	1.86	1.413	Putative protein of unknown function, transcription is positively regulated by Tbf1p; predicted ORF in Assemblies 19, 20 and 21; Uncharacterized [orf19.5929;orf19.5929;orf19.13350;IPF21236.1;IPF133.1;Contig4-2867_0009;orf6.9108;CA6121;CaO19.5929;CaO19.13350;IPF33]
Cal311340W	orf19.5964.2	1.019	1.558	1.2885	Protein described as a ribosomal protein; downregulation correlates with clinical development of fluconazole resistance; shows colony morphology-related gene regulation by Ssn6p; Uncharacterized [orf19.5964.2;orf19.5964.2;IPF21319.1;IPF47.1;Contig4-3087_0001;CA6092;RPL35.3]
Cal311630W	orf19.5980	1.277	1.82	1.5485	Predicted ORF in Assemblies 19, 20 and 21; Uncharacterized [orf19.5980;orf19.5980;orf19.13401;IPF21196.1;IPF21.1;Contig4-3042_0033;orf6.9057;CA6080;CaO19.5980;CaO19.13401;IPF21]
Cal311640C	orf19.5982	1.765	2.429	2.097	Predicted ribosomal protein; Plc1p-regulated, Tbf1p-activated; genes encoding cytoplasmic ribosomal subunits, translation factors, and tRNA synthetases are downregulated upon phagocytosis by murine macrophage; Uncharacterized [orf19.5982;orf19.5982;orf19.13403;IPF21165.1;IPF21278.1;IPF18.1;IPF20.1;RPL18B;Contig4-3042_0035;orf6.9055;orf19.5981.1;CA6079;RPL18.exon2]
Cal311790C	orf19.5992	0.778	1.47	1.124	Transcriptional regulator of white-opaque switching; required for maintenance of opaque state; Verified [orf19.5992;orf19.5992;orf19.13413;IPF21214.1;IPF4835.1;Contig4-2837_0008;orf6.9045;CA6071;CaO19.13413;CaO19.5992;IPF4835]
Cal311990C	orf19.6002	1.136	1.767	1.4515	Predicted ribosomal protein; transcription is regulated upon yeast-hyphal switch; genes encoding cytoplasmic ribosomal subunits, translation factors, and tRNA synthetases are downregulated upon phagocytosis by murine macrophage; Uncharacterized [orf19.6002;orf19.6002;RPL81;orf19.13423;IPF21253.1;IPF8312.2;RPL8B-1;Contig4-1997_0002;orf6.9035;CA6064;CaO19.6002;CaO19.13423]
Cal312030W	orf19.6003	1.044	1.32	1.182	Predicted ORF in Assemblies 19, 20 and 21; Uncharacterized [orf19.6003;orf19.6003;orf19.13424;IPF21190.1;IPF8311.1;Contig4-1997_0004;Contig4-2656_0014;orf6.9034;CA6063;CaO19.6003;CaO19.13424;IPF8311]
Cal101940C	orf19.6017	0.679	1.348	1.0135	Predicted ORF in Assemblies 19, 20 and 21; Uncharacterized [orf19.6017;orf19.6017;MCM1;orf19.13438;IPF21049.1;IPF13839.1;Contig4-2810_0020;orf6.1429;CA0477;CaO19.6017;CaO19.13438;IPF13839]
Cal101770W	orf19.6024	1.44	0.881	1.1605	Predicted ORF in Assemblies 19, 20 and 21; Uncharacterized [orf19.6024;orf19.6024;orf19.13445;IPF21069.1;IPF7899.1;Contig4-2833_0005;orf6.3928;CA2152;CaO19.6024;CaO19.13445;IPF7899]
Cal101740W	orf19.6026:orf19.6025	2.94	4.023	3.4815	C-8 sterol isomerase; enzyme of ergosterol biosynthesis; converts fecosterol to episterol; mutant is hypersensitive to multiple drugs; ketoconazole-induced; flow model and Spider biofilm repressed
Cal101670C	orf19.6028	0.845	1.53	1.1875	Hypha-specific G1 cyclin-related protein involved in regulation of hyphal morphogenesis; Cdc28p-Hgc1p maintains Cdc11p S394 phosphorylation during hyphal growth; required for virulence in mouse model; regulated by Nrg1p, Tup1p, farnesol; Verified [orf19.6028;orf19.6028;CLN21;CLN3;orf19.13449;IPF7912.2;IPF15332.2;Contig4-2280_0001;orf6.1969;orf6.3156;CA1582;CaO19.6028]
Cal101470W	orf19.6036	1.279	2.028	1.6535	Protein not essential for viability; similar to S. cerevisiae Ric1p, which is a guanyl-nucleotide exchange factor; Uncharacterized [orf19.6036;orf19.6036;orf19.13457;IPF21148.1;IPF1460.1;Contig4-2972_0009;orf6.7580;CA4899;CaO19.6036;CaO19.13457;IPF1460]
Cal100400C	orf19.6084	1.229	1.998	1.6135	Predicted ORF in Assemblies 19, 20 and 21; Uncharacterized [orf19.6084;orf19.6084;orf19.13503;IPF21095.1;IPF4608.1;Contig4-2998_0016;orf6.6257;CA3865;CaO19.6084;CaO19.13503;IPF4608]
Cal100390W	orf19.6085	1.643	1.966	1.8045	Protein similar to S. cerevisiae ribosomal protein Rpl16Ap; transposon mutation affects filamentous growth; genes encoding cytoplasmic ribosomal subunits are downregulated upon phagocytosis by murine macrophage; Verified [orf19.6085;orf19.6085;RPL16;orf19.13504;IPF21087.1;IPF4609.1;Contig4-2998_0015;orf6.6256;CA3864;CaO19.13504;CaO19.6085]
CalR17890C	orf19.610	0.706	1.362	1.034	Transcriptional repressor; required for white-phase cell type; hyphal growth, metabolism, cell-wall gene regulator; roles in adhesion, virulence; Cph1p and Efg1p have role in host cytokine response; bHLH; binds E-box; T206 phosphorylated; Verified [orf19.610;orf19.610;IPF3577.2;IPF3575.2;Contig4-2215_0003;orf6.2978;orf6.4821;CA2787;orf19.8243]
Cal100130W	orf19.6112,orf19.2661,orf19.7276.1,orf19.362,orf19.3074,orf19.4054,orf19.7127.1,orf19.7544,orf19.2662,orf19.1923,tL(CAA)5	0.747	1.584	1.1655	Putative transcription factor; Med2 mediator domain; activates transcription in 1-hybrid assay in S. cerevisiae; repressed by Efg1; member of a family of telomere-proximal genes; Tbf1-induced
Cal116010C	orf19.6197	2.179	5.089	3.634	Predicted ORF in Assemblies 19, 20 and 21; Uncharacterized [orf19.6197;orf19.6197;DHH1;orf19.13577;IPF20903.1;IPF19979.1;Contig4-2590_0004;Contig4-2590_0005;orf6.5427;CA3217;CaO19.13577;CaO19.6197]
Cal116020W	orf19.6197	0.797	1.502	1.1495	Predicted ORF in Assemblies 19, 20 and 21; Uncharacterized [orf19.6197;orf19.6197;DHH1;orf19.13577;IPF20903.1;IPF19979.1;Contig4-2590_0004;Contig4-2590_0005;orf6.5427;CA3217;CaO19.13577;CaO19.6197]
Cal115940W	orf19.6200	1.186	1.095	1.1405	Predicted ORF in Assemblies 19, 20 and 21; Uncharacterized [orf19.6200;orf19.6200;orf19.13580;IPF8147.2;IPF27770.1;Contig4-2022_0012;Contig4-2612_0003;orf6.5424;orf6.929;CA0229;CaO19.6200;IPF8147]
Cal115880W	orf19.6203	0.896	1.48	1.188	Predicted zinc-finger protein of unknown function; has similarity to S. cerevisiae Put3p, which is a transcription factor involved in the regulation of proline utilization genes; Uncharacterized [orf19.6203;orf19.6203;orf19.13584;IPF19238.2;IPF8158.2;Contig4-2876_0013;orf6.536;orf6.5421;CA3214;CaO19.6203]
Cal115590C	orf19.6220.4	0.521	1.532	1.0265	ORF Predicted by Annotation Working Group; Uncharacterized [orf19.6220.4;orf19.6220.4;IPF20959.1;IPF7424.1;Contig4-2759_0004;CA2579;RPL34B.3]
Cal115580W	orf19.6222	1.138	1.925	1.5315	Predicted ORF in Assemblies 19, 20 and 21; similar to S. cerevisiae Spo22p; Uncharacterized [orf19.6222;orf19.6222;orf19.13603;IPF7423.3;IPF27762.1;Contig4-2759_0006;orf6.4534;orf6.1288;CA6303;CA0400;orf19.6223;IPF7423.5f]
Cal115400W	orf19.6227	1.614	2.139	1.8765	Predicted ORF in Assemblies 19, 20 and 21; Uncharacterized [orf19.6227;orf19.6227;orf19.13607;IPF20919.1;IPF14013.2;Contig4-1851_0006;Contig4-1851_0008;orf6.5129;CA3012;CaO19.13607;CaO19.6227;IPF14013]
Cal114880W	orf19.6253	1.46	1.648	1.554	Putative ribosomal protein; genes encoding cytoplasmic ribosomal subunits, translation factors, and tRNA synthetases are downregulated upon phagocytosis by murine macrophage; Uncharacterized [orf19.6253;orf19.6253;RPS23;orf19.13632;IPF13519.1;IPF14082.3;Contig4-2748_0005;orf6.1570;orf6.2268;CA0567;CaO19.6253;RPS23.5f]
Cal114570C	orf19.6265.1	1.159	2.023	1.591	Putative ribosomal protein; genes encoding cytoplasmic ribosomal subunits, translation factors, and tRNA synthetases are downregulated upon phagocytosis by murine macrophage; transcription is positively regulated by Tbf1p; Uncharacterized [orf19.6265.1;orf19.6265.1;RPS14;IPF20952.1;IPF4881.1;Contig4-2747_0012;CA3690]
Cal114410W	orf19.6272	1.638	2.055	1.8465	Predicted ORF in Assemblies 19, 20 and 21; regulated by Gcn2p and Gcn4p; Uncharacterized [orf19.6272;orf19.6272;YUH1;orf19.13651;IPF4866.1;IPF27771.1;Contig4-2683_0012;orf6.6031;CA3697;CaO19.6272;IPF4866]
CalR17200C	orf19.6286.2	1.164	2.069	1.6165	Putative ribosomal protein; genes encoding cytoplasmic ribosomal subunits, translation factors, and tRNA synthetases are downregulated upon phagocytosis by murine macrophage; Uncharacterized [orf19.6286.2;orf19.6286.2;IPF9327.1;Contig4-2560_0004;CA3226;RPS27B]
Cal503630C	orf19.6294	1.037	1.583	1.31	Component of actomyosin ring at neck of newly-emerged bud; Verified [orf19.6294;orf19.6294;orf19.13673;IPF20864.1;IPF10851.2;Contig4-2045_0002;orf6.5444;CA3233;CaO19.6294;CaO19.13673]
CalR10780W	orf19.6312	0.808	1.657	1.2325	Putative ribosomal protein; Hog1p-induced; genes encoding cytoplasmic ribosomal subunits, translation factors, and tRNA synthetases are downregulated upon phagocytosis by murine macrophage; Uncharacterized [orf19.6312;orf19.6312;orf19.13689;IPF20833.1;IPF6267.1;Contig4-3056_0018;orf6.5505;CA3278;CaO19.6312;CaO19.13689;RPS3E]
Cal129350W	orf19.6340	0.942	1.53	1.236	Predicted ORF in Assemblies 19, 20 and 21; Uncharacterized [orf19.6340;orf19.6340;RPB5;orf19.13696;IPF20809.1;IPF17067.2;Contig4-1616_0003;orf6.5769;CA3494]
Cal129210W	orf19.6346	0.85	1.476	1.163	Predicted ORF in Assemblies 19, 20 and 21; decreased transcription is observed in an azole-resistant strain that overexpresses MDR1; Uncharacterized [orf19.6346;orf19.6346;orf19.13702;IPF20804.1;IPF14487.2;Contig4-2232_0001;orf6.5775;CA3500;CaO19.6346;IPF14487]
Cal128990W	orf19.6357	0.699	1.348	1.0235	Predicted ORF in Assemblies 19, 20 and 21; Uncharacterized [orf19.6357;orf19.6357;MAD1;orf19.13714;IPF20796.1;IPF11251.2;Contig4-2678_0004;Contig4-2678_0005;orf6.5786;CA3510]
Cal128960C	orf19.6358	0.765	1.47	1.1175	Predicted ORF in Assemblies 19, 20 and 21; Uncharacterized [orf19.6358;orf19.6358;MMS2;orf19.13715;IPF20810.1;IPF11248.2;Contig4-2678_0007;orf6.5787;CA3511;CaO19.13715;CaO19.6358]
CalR18250W	orf19.6367	1.346	2.071	1.7085	Putative heat shock protein; SSB subfamily of the HSP70 family; mRNA in yeast-form cells, germ tubes; at surface of yeast-form cells, but not hyphae; soluble in hyphae; antigenic in human, mouse systemic infection; macrophage, GCN-induced; Verified [orf19.6367;orf19.6367;orf19.13724;HS75;IPF20722.1;IPF13454.2;orf6.5819;CA3534;CaO19.6367;CaO19.13724]
CalR18360W	orf19.6376	0.772	1.594	1.183	Putative protein phosphatase of the Type 2C-related family (serine/threonine-specific), similar to <i>S. cerevisiae</i> Ptc5p; mutant shows virulence defect; Uncharacterized [orf19.6376;orf19.6376;orf19.13733;IPF20726.1;IPF5424.2;orf6.5828;CA3540;CaO19.13733;CaO19.6376]
CalR18780W	orf19.6403	1.029	1.638	1.3335	Predicted ORF in Assemblies 19, 20 and 21; Uncharacterized [orf19.6403;orf19.6403;SLS1;orf19.13761;IPF20735.1;IPF5113.2;Contig4-2839_0009;orf6.7851;CA5126;CaO19.6403;CaO19.13761]
CalR18790C	orf19.6403.1	0.771	1.488	1.1295	Conserved acidic ribosomal protein, likely involved in regulation of translation elongation; interacts with Rpp1Bp; one of four similar ribosomal proteins (Rpp1Ap, Rpp1Bp, Rpp2Ap, Rpp2Bp); CUG start codon; upstream uORFs; Tbf1p-activated; Verified [orf19.6403.1;orf19.6403.1;RPP2;RP2A;CARP2A;IPF20786.1;IPF5111.2;Contig4-2839_0010;Contig4-2839_0011;CA5125]
CalR19060C	orf19.6415.1	0.848	1.408	1.128	ORF Predicted by Annotation Working Group; intron in 5'-UTR; Uncharacterized [orf19.6415.1;orf19.6415.1;IPF20724.1;IPF27718.1]
CalR19070W	orf19.6415.1,orf19.6417	0.911	1.524	1.2175	Ortholog(s) have structural constituent of ribosome activity and cytosolic small ribosomal subunit, nucleus localization
CalR19090W	orf19.6417	0.615	1.392	1.0035	Predicted ORF in Assemblies 19, 20 and 21; decreased expression in response to prostaglandins; Uncharacterized [orf19.6417;orf19.6417;tsr1;orf19.13775;IPF20707.1;IPF1334.1;Contig4-3073_0011;orf6.7837;CA5114;CaO19.13775;CaO19.6417;IPF1334]
Cal705520W	orf19.6458	3.857	0.377	2.117	Predicted ORF in Assemblies 19, 20 and 21; Uncharacterized [orf19.6458;orf19.6458;orf19.13816;IPF20623.1;IPF13934.2;Contig4-2468_0006;orf6.6001;CA3670;CaJ7.0293;CaJ7_0293;CaO19_6458;CaO19.6458;IPF13934]
Cal705530C	orf19.6458	0.774	1.372	1.073	Predicted ORF in Assemblies 19, 20 and 21; Uncharacterized [orf19.6458;orf19.6458;orf19.13816;IPF20623.1;IPF13934.2;Contig4-2468_0006;orf6.6001;CA3670;CaJ7.0293;CaJ7_0293;CaO19_6458;CaO19.6458;IPF13934]
Cal705070W	orf19.6480,orf19.6479	1.468	3.031	2.2495	Ortholog(s) have role in UDP-glucose transport and COPI-coated vesicle, Golgi apparatus localization
Cal704800C	orf19.6492	0.631	1.397	1.014	Predicted ORF in Assemblies 19, 20 and 21; Uncharacterized [orf19.6492;orf19.6492;orf19.13845;IPF20604.1;IPF17347.2;orf6.289;CA0044;CaJ7.0258;CaJ7_0258;CaO19_6492;CaO19.13845;CaO19.6492;IPF17347]
Cal703840C	orf19.6541	1.196	1.86	1.528	Predicted ribosomal protein; genes encoding cytoplasmic ribosomal subunits, translation factors, and tRNA synthetases are downregulated upon phagocytosis by murine macrophage; Uncharacterized [orf19.6541;orf19.6541;orf19.13894;IPF20618.1;IPF10601.1;Contig4-2763_0003;orf6.5273;CA3111;CaJ7.0206;CaO19_6541;CaJ7_0206;CaO19.6541;CaO19.13894]
Cal703750C	orf19.6551	0.828	1.549	1.1885	Predicted ORF in Assemblies 19, 20 and 21; Uncharacterized [orf19.6551;orf19.6551;GOS1;orf19.13904;IPF20637.1;IPF11824.2;Contig4-2620_0009;orf6.5263;CA3107;CaJ7.0196;CaJ7_0196;CaO19_6551;CaO19.13904;CaO19.6551]
Cal703630W	orf19.6555	0.504	1.77	1.137	Predicted ORF in Assemblies 19, 20 and 21; Uncharacterized [orf19.6555;orf19.6555;orf19.13908;IPF12086.3;IPF27693.1;Contig4-2437_0006;orf6.5259;orf6.7543;CaJ7.0191;CaO19.6555;CaJ7_0191;CaO19_6555;CA3103;IPF12086;IPF12086.2]
Cal703600C	orf19.6556	0.651	1.37	1.0105	Predicted ORF in Assemblies 19, 20 and 21; Uncharacterized [orf19.6556;orf19.6556;orf19.13909;IPF19569.2;IPF19568.1;orf6.330;orf6.7544;CA4870;CaJ7.0190;CaJ7_0190;CaO19_6556;CaO19.6556;IPF19568]
Cal703330C	orf19.6573	1.338	2.033	1.6855	Putative Rho1p GTPase activating protein (GAP); serum-induced transcription; Uncharacterized [orf19.6573;orf19.6573;orf19.13926;IPF20639.1;IPF1649.2;Contig4-2887_0010;Contig4-2887_0011;orf6.7561;CA4883;CaJ7.0172;CaO19.13926;CaJ7_0172;CaO19_6573;CaO19.6573;IPF1649]
Cal703300C	orf19.6574	1.361	2.156	1.7585	Protein described as cytochrome P-450 of N-alkane-induced detoxification; macrophage-induced gene; Uncharacterized [orf19.6574;orf19.6574;orf19.13927;IPF20591.1;IPF1640.1;Contig4-2887_0006;orf6.7562;CA4884;CaJ7.0170;CaO19.13927;CaJ7_0170;CaO19_6574;CaO19.6574]
Cal703230C	orf19.6578	1.274	0.808	1.041	Predicted membrane transporter, member of the vesicular neurotransmitter (VNT) family, major facilitator superfamily (MFS); downregulated in core caspofungin response; Uncharacterized [orf19.6578;orf19.6578;orf19.13931;IPF20585.1;IPF1634.1;Contig4-3066_0002;orf6.7566;CA4886;CaJ7.0166;CaO19.6578;CaO19.13931;CaO19_6578;CaJ7_0166;IPF1634]
Cal703110C	orf19.6583	2.435	2.906	2.6705	Predicted ORF in Assemblies 19, 20 and 21; transcription is induced in response to alpha pheromone in SpiderM medium; Uncharacterized [orf19.6583;orf19.6583;orf19.13936;IPF20699.1;IPF1627.1;Contig4-3066_0013;orf6.7571;CA4891;CaJ7.0161;CaO19.13936;CaJ7_0161;CaO19_6583;CaO19.6583;IPF1627]
Cal702990W	orf19.6588,orf19.6587	1.486	1.707	1.5965	Protein containing an SH3 domain; involved in vacuolar fusion in hyphae; mutants form multiple germ tubes; Spider biofilm induced
CalR21550W	orf19.6597	0.799	2.172	1.4855	Predicted ORF in Assemblies 19, 20 and 21; Uncharacterized [orf19.6597;orf19.6597;IPF12741.2;orf6.6209;CA3837;CaO19.6597;IPF12741]
CalR21410W	orf19.6602	1.171	1.684	1.4275	Predicted ORF in Assemblies 19, 20 and 21; Uncharacterized [orf19.6602;orf19.6602;FMP53;IPF7947.1;Contig4-2790_0002;orf6.6214;CA3843;CaO19.6602;IPF7947]
CalR21230C	orf19.6612	0.806	1.274	1.04	Predicted ORF in Assemblies 19, 20 and 21; Uncharacterized [orf19.6612;orf19.6612;IPF7932.1;orf6.6224;CA3850;CaO19.6612;IPF7932]
Cal507770W	orf19.6662	0.893	1.615	1.254	Putative protein of unknown function, transcription is upregulated in clinical isolates from HIV+ patients with oral candidiasis; predicted ORF in Assemblies 19, 20 and 21; Uncharacterized [orf19.6662;orf19.6662;IPF2287.1;Contig4-3038_0011;orf6.6771;CA4268;CaO19.6662;IPF2287]
Cal507780C	orf19.6663	0.98	1.876	1.428	Predicted ribosomal protein; macrophage/pseudohyphal-induced after 16 h; downregulated upon phagocytosis by murine macrophage; transcription is positively regulated by Tbf1p; intron in 5'-UTR; Uncharacterized [orf19.6663;orf19.6663;RPS25;IPF2288.1;Contig4-3038_0012;orf6.6772;CA4269;CaO19.6663]
Cal126150W	orf19.667.1	1.058	1.9	1.479	Predicted ribosomal protein; Uncharacterized [orf19.667.1;orf19.667.1;IPF26651.1;IPF20156.1;Contig4-2094_0006;CA4102]
Cal707820W	orf19.6688	0.868	1.347	1.1075	Decreased transcription is observed upon benomyl treatment or in an azole-resistant strain that overexpresses MDR1; Uncharacterized [orf19.6688;orf19.6688;orf19.13980;IPF20483.1;IPF2615.1;IPF2615;Contig4-3088_0015;orf6.6797;CA4291;CaJ7.0406;CaJ7_0406;CaO19_6688;CaO19.13980;CaO19.6688]
Cal707870W	orf19.6689	1.368	1.486	1.427	Argininosuccinate lyase, catalyzes the final step in the arginine biosynthesis pathway; alkaline downregulated; Verified [orf19.6689;orf19.6689;ARG57;orf19.13981;orf6.6798;IPF20481.1;IPF2612.2;Contig4-3088_0016;CA4292;CaJ7.0407;CaJ7_0407;CaO19_6689;CaO19.13981;CaO19.6689]
Cal707640C	orf19.6705	0.901	1.281	1.091	Putative guanyl nucleotide exchange factor with Sec7 domain; transcriptionally regulated upon yeast-hyphal switch; filament induced; regulated by Nrg1p, Tup1p; shows Mob2p-dependent hyphal regulation; Uncharacterized [orf19.6705;orf19.6705;orf19.13997;IPF20496.1;IPF6654.2;Contig4-2413_0004;orf6.6814;YBL60;CA4305;CaJ7.0399;CaO19.13997;CaO19_6705;CaJ7_0399;CaO19.6705;IPF6654]
Cal316870W	orf19.6780	1.425	2.066	1.7455	Predicted ORF in Assemblies 19, 20 and 21; regulated by Gcn2p and Gcn4p; Uncharacterized [orf19.6780;orf19.6780;orf19.14072;IPF20394.1;IPF2818.1;Contig4-2943_0012;orf6.8851;CA5925;CaO19.14072;CaO19.6780]
Cal316830C	orf19.6781	1.032	1.701	1.3665	Putative transcription factor with zinc finger DNA-binding motif; Uncharacterized [orf19.6781;orf19.6781;ZFU2;orf19.14073;IPF20371.1;IPF2822.1;Contig4-2943_0009;orf6.8850;CA5924;CaO19.6781;CaO19.14073;IPF2822]
Cal316720C	orf19.6785	0.952	1.785	1.3685	Protein described as acidic ribosomal protein S12; regulated by Gcn4p, activated by Tbf1p; repressed under amino acid starvation (3-aminotriazole treatment); protein abundance is affected by URA3 expression in the CAI-4 strain background; Uncharacterized [orf19.6785;orf19.6785;orf19.14077;IPF20428.1;IPF8927.1;Contig4-2621_0003;orf6.8846;CA5920;CaO19.14077;CaO19.6785]
Cal316710W	orf19.6786	0.683	1.339	1.011	Predicted ORF in Assemblies 19, 20 and 21; possibly spurious ORF (Annotation Working Group prediction); Uncharacterized [orf19.6786;orf19.6786;orf19.14078;IPF20351.1;IPF8926.2;Contig4-1999_0001;Contig4-1999_0006;orf6.8845;CA5919;CaO19.6786;CaO19.14078;IPF8926.3]
Cal128620W	orf19.68.2	1.326	1.888	1.607	ORF Predicted by Annotation Working Group; Uncharacterized [orf19.68.2;orf19.68.2;IPF27197.1;IPF17130.1]
Cal316260C	orf19.6805	1.923	2.67	2.2965	Predicted ORF in Assemblies 19, 20 and 21; Uncharacterized [orf19.6805;orf19.6805;orf19.14097;IPF20302.1;IPF2374.2;orf6.8826;CA5901;CaO19.14097;CaO19.6805;IPF2374]
Cal316050C	orf19.6816	2.385	3.475	2.93	Predicted ORF in Assemblies 19, 20 and 21; Uncharacterized [orf19.6816;orf19.6816;orf19.14108;IPF20400.1;IPF2400.1;Contig4-3076_0009;orf6.8815;CA5891;CaO19.6816;CaO19.14108;IPF2400]
Cal411770W	orf19.6861	1.063	1.82	1.4415	Predicted ORF in Assemblies 19, 20 and 21; Uncharacterized [orf19.6861;orf19.6861;APC5;orf19.14151;IPF20261.1;IPF9828.2;Contig4-2844_0002;orf6.7010;CA4464;CaO19.6861;CaO19.14151;IPF9828]
Cal604330C	orf19.687.1	0.516	1.578	1.047	ORF Predicted by Annotation Working Group; shows colony morphology-related gene regulation by Ssn6p; Uncharacterized [orf19.687.1;orf19.687.1;IPF26650.1;IPF9581.1;Contig4-2607_0004;CA1977;RPL25.3]
Cal212580C	orf19.6873	1.178	1.902	1.54	Putative ribosomal protein; similar to S. cerevisiae Rps8Bp; gene is induced by ciclopirox olamine treatment; genes encoding cytoplasmic ribosomal subunits are downregulated upon phagocytosis by murine macrophage; intron in 5'-UTR; Uncharacterized [orf19.6873;orf19.6873;RPS8;orf19.14162;IPF20242.1;IPF6565.2;Contig4-3086_0015;orf6.7137;CA4562;CaO19.6873;CaO19.14162]
Cal212590W	orf19.6873,orf19.6873.1	1.132	2.36	1.746	Small 40S ribosomal subunit protein; induced by ciclopirox olamine; repressed upon phagocytosis by murine macrophage; 5'-UTR intron; Hap43-induced; Spider biofilm repressed
Cal212810C	orf19.6882.1	0.82	1.774	1.297	ORF Predicted by Annotation Working Group; Uncharacterized [orf19.6882.1;orf19.6882.1;RPL33;IPF20254.1;IPF9548.1;Contig4-3086_0043;CA4571;RPL33.3]
Cal702670W	orf19.6906	0.931	2.007	1.469	40S ribosomal subunit protein; similar to G-beta subunits; antigenic in human, murine infection; soluble in hyphae; iron, temperature, Gcn4p regulated; amino acid starvation (3-aminotriazole)-, caspofungin-, farnesol-downregulated; Verified [orf19.6906;orf19.6906;BEL1;orf6.7170;Contig4-3039_0017;IPF2221.1;Contig4-3039_0016;orf19.6906.1;CA4588;CaJ7.0140;CA4589;BEL1.exon2;IPF2220.1;BEL1.exon1]
Cal702660W	orf19.6906,snR24	0.911	1.979	1.445	40S ribosomal subunit protein; similar to G-beta subunits; antigenic in human, murine infection; soluble in hyphae; iron, temperature, Gcn4p regulated; amino acid starvation (3-aminotriazole)-, caspofungin-, farnesol-downregulated; Verified [orf19.6906;orf19.6906;BEL1;orf6.7170;Contig4-3039_0017;IPF2221.1;Contig4-3039_0016;orf19.6906.1;CA4588;CaJ7.0140;CA4589;BEL1.exon2;IPF2220.1;BEL1.exon1]
Cal702730W	orf19.6909	0.931	1.451	1.191	40S ribosomal subunit protein; similar to G-beta subunits; antigenic in human, murine infection; soluble in hyphae; iron, temperature, Gcn4p regulated; amino acid starvation (3-aminotriazole)-, caspofungin-, farnesol-downregulated; Verified [orf19.6906;orf19.6906;BEL1;orf6.7170;Contig4-3039_0017;IPF2221.1;Contig4-3039_0016;orf19.6906.1;CA4588;CaJ7.0140;CA4589;BEL1.exon2;IPF2220.1;BEL1.exon1]
Cal702930C	orf19.6920	0.89	1.701	1.2955	Predicted ORF in Assemblies 19, 20 and 21; induced upon biofilm formation; possibly spurious ORF (Annotation Working Group prediction); Uncharacterized [orf19.6920;orf19.6920;IPF2195.1;Contig4-2895_0017;orf6.7184;CA4601;CaJ7.0154;CaO19.6920;CaO19_6920;CaJ7_0154;IPF2195]
CalR14670C	orf19.693	1.643	2.271	1.957	Predicted ORF in Assemblies 19, 20 and 21; Uncharacterized [orf19.693;orf19.693;IPF18511.2;IPF16201.2;Contig4-1704_0003;orf6.4014;orf6.456;CA0085;CaO19.693;IPF16201]
CalR14700W	orf19.695	1.542	0.986	1.264	Protein of RGS superfamily; not essential for viability; possibly spurious ORF (Annotation Working Group prediction); Uncharacterized [orf19.695;orf19.695;orf19.8314;IPF18512;IPF26603.1;IPF18512.1;orf6.4013;CA2209;CaO19.8314;CaO19.695]
Cal312200C	orf19.6968	1.205	0.948	1.0765	Predicted ORF in Assemblies 19, 20 and 21; Hog1p-downregulated; Uncharacterized [orf19.6968;orf19.6968;IPF7561.2;Contig4-2973_0020;orf6.7714;CA5016;CaO19.6968;IPF7561]
Cal312310C	orf19.6975	0.763	1.817	1.29	Ribosome-associated protein; antigenic in mouse; complements S. cerevisiae yst1 yst2 mutant; similar to laminin-binding proteins, but does not bind laminin; possible S/T phosphorylation, N-glycosylation, myristoylation, Gcn4p-regulated; Verified [orf19.6975;orf19.6975;IPF7549.1;RPS0A;Contig4-2973_0009;orf6.7721;CA5022;orf19.6975.1;CA5021;YST1.exon2]
Cal312340C	orf19.6976	1.391	1.122	1.2565	Predicted membrane transporter; member of the proton coupled folate transporter/heme carrier protein (PCFT/HCP) family, major facilitator superfamily (MFS); virulence-group-correlated expression; Uncharacterized [orf19.6976;orf19.6976;IPF7547.2;Contig4-2973_0006;orf6.7722;CA5023;CaO19.6976;IPF7547]
Cal312550W	orf19.6983	1.114	1.816	1.465	Predicted ORF in Assemblies 19, 20 and 21; repressed by nitric oxide; Uncharacterized [orf19.6983;orf19.6983;IPF2997.1;Contig4-2787_0006;orf6.7729;CA5029;CaO19.6983;IPF2997]
Cal312670W	orf19.6986	1.141	1.742	1.4415	Predicted ORF in Assemblies 19, 20 and 21; Uncharacterized [orf19.6986;orf19.6986;MSB3;IPF2982.1;Contig4-2884_0003;Contig4-2884_0004;orf6.7732;CA5032;CaO19.6986;IPF2982]
CalR14870W	orf19.699	0.861	1.29	1.0755	Predicted ORF in Assemblies 19, 20 and 21; Uncharacterized [orf19.699;orf19.699;orf19.8318;IPF26611.1;IPF17671.2;Contig4-2015_0004;orf6.4009;CaO19.8318;CaO19.699]
Cal702210C	orf19.7014:orf19.7013	0.949	1.603	1.276	Putative protein of unknown function; transcription is positively regulated by Tbf1p; overlaps orf19.7015
Cal702110C	orf19.7017	0.633	1.47	1.0515	Predicted ORF in Assemblies 19, 20 and 21; Uncharacterized [orf19.7017;orf19.7017;IPF2351.1;Contig4-3091_0036;orf6.7943;CA5202;CaJ7.0115;CaO19.7017;CaJ7_0115;CaO19_7017]
Cal702100W	orf19.7018	0.759	1.703	1.231	Predicted ribosomal protein; genes encoding cytoplasmic ribosomal subunits, translation factors, and tRNA synthetases are downregulated upon phagocytosis by murine macrophage; repressed by nitric oxide; Uncharacterized [orf19.7018;orf19.7018;IPF2353.1;RPS18A;Contig4-3091_0033;orf6.7944;CA5203;CaJ7.0114]
Cal702080W	orf19.7019	1.661	2.928	2.2945	Protein described as a mitochondrial ribosomal protein; induced upon adherence to polystyrene; Uncharacterized [orf19.7019;orf19.7019;IPF2354.1;Contig4-3091_0029;orf6.7945;CA5204;CaJ7.0113;CaO19.7019;CaO19_7019;CaJ7_0113]
Cal701760W	orf19.7034	2.458	0.575	1.5165	Predicted ORF in Assemblies 19, 20 and 21; Uncharacterized [orf19.7034;orf19.7034;IPF3069.2;Contig4-2889_0017;orf6.7960;CA5216;CaJ7.0098;CaO19.7034;CaO19_7034;CaJ7_0098;IPF3069]
Cal701680W	orf19.7038	0.997	1.157	1.077	Predicted ORF in Assemblies 19, 20 and 21; Uncharacterized [orf19.7038;orf19.7038;MVP1;IPF3075.1;IPF3076.1;Contig4-1858_0003;orf6.7964;orf6.7965;CA5220;CaJ7.0093;orf19.7039;CA5221;MVP1.exon1;MVP1.exon2]
Cal701640W	orf19.7041	0.708	1.358	1.033	Predicted ORF in Assemblies 19, 20 and 21; Uncharacterized [orf19.7041;orf19.7041;PTA1;IPF3079.2;Contig4-1858_0007;orf6.7967;CA5222;CaJ7.0091;CaO19.7041;CaJ7_0091;CaO19_7041;IPF3079]
Cal701620W	orf19.7042	2.277	2.829	2.553	Increased transcription is observed upon benomyl treatment or in an azole-resistant strain that overexpresses MDR1; induced by nitric oxide; Uncharacterized [orf19.7042;orf19.7042;IPF3080.2;IPF3080;Contig4-2855_0017;orf6.7968;CA5223;CaJ7.0090;CaO19_7042;CaJ7_0090;CaO19.7042]
Cal701460W	orf19.7047	1.559	2.101	1.83	Protein induced during the mating process; Uncharacterized [orf19.7047;orf19.7047;orf6.8505;IPF3088.3;Contig4-2855_0020;orf6.7973;CA5228;CaJ7.0085;orf19.7048;RTF1.3f;RTF1.3eoc;IPF3088.2]
Cal701470C	orf19.7047	0.886	1.596	1.241	Protein induced during the mating process; Uncharacterized [orf19.7047;orf19.7047;orf6.8505;IPF3088.3;Contig4-2855_0020;orf6.7973;CA5228;CaJ7.0085;orf19.7048;RTF1.3f;RTF1.3eoc;IPF3088.2]
Cal701390W	orf19.7050	0.941	1.692	1.3165	Protein described as a nucleolar ribosome biogenesis factor; hyphal-induced expression; Uncharacterized [orf19.7050;orf19.7050;IPF447.1;Contig4-2838_0006;Contig4-2871_0006;orf6.8503;CA5644;CaJ7.0083;CaO19.7050;CaJ7_0083;CaO19_7050;IPF447]
Cal701370W	orf19.7051	0.852	1.324	1.088	Predicted ORF in Assemblies 19, 20 and 21; Uncharacterized [orf19.7051;orf19.7051;IPF448.1;Contig4-2871_0005;orf6.8502;CA5643;CaJ7.0082;CaO19_7051;CaJ7_0082;CaO19.7051;IPF448]
CalR14510C	orf19.714	1.134	1.153	1.1435	Predicted ORF in Assemblies 19, 20 and 21; Uncharacterized [orf19.714;orf19.714;YPT6;orf19.8333;IPF15785.2;IPF13387.1;Contig4-1948_0007;Contig4-2069_0006;orf6.2635;orf6.408;CA1236;CaO19.714]
Cal709180C	orf19.7150	0.849	1.496	1.1725	Transcriptional repressor; regulates hyphal genes, virulence genes, chlamydospore development, and genes involved in rescue and stress responses; effects both Tup1p-dependent (major) and -independent (minor) regulation; Verified [orf19.7150;orf19.7150;IPF1932.1;Contig4-3083_0019;orf6.8050;CA5289;CaJ7.0489;CaO19_7150;CaJ7_0489;CaO19.7150]
CalR14470C	orf19.716	0.859	1.619	1.239	Predicted ORF in Assemblies 19, 20 and 21; regulated by Nrg1p, Tup1p; transcription is repressed in response to alpha pheromone in SpiderM medium; Uncharacterized [orf19.716;orf19.716;orf19.8335;IPF15781.2;IPF29722.1;Contig4-2069_0010;orf6.2637;CA1238;CaO19.716;CaO19.8335;IPF15781]
CalR14460W	orf19.717	0.748	1.264	1.006	Protein described as mitochondrial heat shock protein; soluble protein in hyphae; transcription is regulated by Nrg1p; transcriptionally regulated by iron; expression greater in high iron; heavy metal (cadmium) stress-induced; Verified [orf19.717;orf19.717;orf19.8336;orf6.2638;IPF26576.1;IPF14025.2;Contig4-2196_0002;CA1239;CaO19.8336;CaO19.717]
Cal708500C	orf19.7194	1.042	1.796	1.419	Protein not essential for viability; decreased transcription is observed upon fluphenazine treatment; induced upon adherence to polystyrene; Verified [orf19.7194;orf19.7194;IPF2147;IPF2147.2;Contig4-3097_0041;orf6.8094;CA5320;CaJ7.0443;CaO19_7194;CaJ7_0443;CaO19.7194]
Cal708440W	orf19.7197	0.833	1.403	1.118	Predicted ORF in Assemblies 19, 20 and 21; Uncharacterized [orf19.7197;orf19.7197;IPF2142.1;Contig4-3097_0048;orf6.8097;CA5323;CaJ7.0440;CaO19_7197;CaJ7_0440;CaO19.7197;IPF2142]
Cal708430C	orf19.7197	0.831	1.211	1.021	Predicted ORF in Assemblies 19, 20 and 21; Uncharacterized [orf19.7197;orf19.7197;IPF2142.1;Contig4-3097_0048;orf6.8097;CA5323;CaJ7.0440;CaO19_7197;CaJ7_0440;CaO19.7197;IPF2142]
Cal708370C	orf19.7200	0.846	1.471	1.1585	Predicted ORF in Assemblies 19, 20 and 21; possibly spurious ORF (Annotation Working Group prediction); Uncharacterized [orf19.7200;orf19.7200;IPF2137.1;Contig4-3097_0053;orf6.8100;CA5326;CaJ7.0437;CaO19.7200;CaO19_7200;CaJ7_0437;IPF2137]
Cal708360W	orf19.7201	2.915	1.281	2.098	Actin binding protein, ortholog of S. cerevisiae Sla2p; required for alkaline pH-induced hyphal formation; Verified [orf19.7201;orf19.7201;IPF2136.1;Contig4-3097_0055;orf6.8101;CA5327;CaJ7.0436;CaJ7_0436;CaO19_7201;CaO19.7201]
Cal708320W	orf19.7203	0.739	1.486	1.1125	Predicted ORF in Assemblies 19, 20 and 21; Uncharacterized [orf19.7203;orf19.7203;MRP7;IPF2131.2;Contig4-3097_0058;orf6.8103;CA5329;CaJ7.0434;CaO19_7203;CaJ7_0434;CaO19.7203]
Cal132310C	orf19.7217	0.832	1.933	1.3825	Putative ribosomal protein; genes encoding cytoplasmic ribosomal subunits, translation factors, and tRNA synthetases are downregulated upon phagocytosis by murine macrophage; Verified [orf19.7217;orf19.7217;RPL4;IPF875.1;Contig4-2519_0003;orf6.8117;CA5343;CaO19.7217]
CalR20280W	orf19.7303	1.536	2.463	1.9995	Predicted ORF in Assemblies 19, 20 and 21; Uncharacterized [orf19.7303;orf19.7303;IPF2827.2;Contig4-2245_0006;orf6.8384;CA5541;CaO19.7303;IPF2827]
CalR20490W	orf19.7312	8.246	7.219	7.7325	Protein similar to S. cerevisiae Erg13p, which is involved in ergosterol biosynthesis; transposon mutation affects filamentous growth; amphotericin B, caspofungin repressed; Verified [orf19.7312;orf19.7312;IPF5977.1;Contig4-2983_0016;orf6.8393;CA5549;CaO19.7312]
CalR21170C	orf19.7343	0.74	1.353	1.0465	Predicted ORF in Assemblies 19, 20 and 21; Uncharacterized [orf19.7343;orf19.7343;PRP4;IPF12538.2;Contig4-2379_0002;orf6.8424;CA5576;CaO19.7343]
Cal313230W	orf19.7354	1.042	1.884	1.463	Predicted ORF in Assemblies 19, 20 and 21; caspofungin induced; Uncharacterized [orf19.7354;orf19.7354;LAC1;IPF19815.1;Contig4-2885_0022;orf6.8514;CA5652;CaO19.7354;IPF19815]
Cal313280W	orf19.7356,orf19.7357	0.802	1.699	1.2505	Ortholog of C. parapsilosis CDC317 : CPAR2_807080, C. dubliniensis CD36 : Cd36_85690, Candida orthopsilosis Co 90-125 : CORT_0C02090 and Candida albicans WO-1 : CAWG_02885:: Ortholog(s) have role in coenzyme A biosynthetic process and cytosol, nucleus localization
Cal313310C	orf19.7358	1.438	2.226	1.832	Predicted ORF in Assemblies 19, 20 and 21; Uncharacterized [orf19.7358;orf19.7358;IPF14683.2;Contig4-2195_0001;orf6.8518;CA5656;CaO19.7358;IPF14683]
Cal313590W	orf19.7367	0.848	1.492	1.17	Protein described as ubiquitin carboxyl-1-terminal hydrolase; Uncharacterized [orf19.7367;orf19.7367;IPF1255.1;Contig4-2926_0029;orf6.8527;CA5665;CaO19.7367]
Cal313650W	orf19.7369	0.742	1.372	1.057	Predicted ORF in Assemblies 19, 20 and 21; Uncharacterized [orf19.7369;orf19.7369;IPF1259.1;Contig4-3093_0001;orf6.8529;CA5667;CaO19.7369;IPF1259]
Cal314010W	orf19.7384	0.645	1.411	1.028	Predicted ORF in Assemblies 19, 20 and 21; mutation confers hypersensitivity to 5-fluorocytosine (5-FC), 5-fluorouracil (5-FU), and tubercidin (7-deazaadenosine); decreased expression in response to prostaglandins; Verified [orf19.7384;orf19.7384;IPF1302.2;Contig4-3036_0030;orf6.8544;CA5682;CaO19.7384]
Cal411510W	orf19.740	2.058	3.072	2.565	Predicted ORF in Assemblies 19, 20 and 21; not required for response to low iron; possibly spurious ORF (Annotation Working Group prediction); transcriptionally activated by Mnl1p under weak acid stress; Verified [orf19.740;orf19.740;orf19.8359;IPF26555.1;IPF13319.2;Contig4-2600_0002;orf6.2411;CA1088;CaO19.740;CaO19.8359;IPF13319]
Cal315240C	orf19.7443	1.064	2.018	1.541	Predicted ORF in Assemblies 19, 20 and 21; Uncharacterized [orf19.7443;orf19.7443;IPF2873.1;Contig4-2076_0001;orf6.8603;CA5733;CaO19.7443;IPF2873]
CalR01430W	orf19.7475	0.893	1.514	1.2035	Predicted ORF in Assemblies 19, 20 and 21; possibly adherence-induced; Uncharacterized [orf19.7475;orf19.7475;IPF2499.1;Contig4-2988_0003;orf6.8727;CA5821;CaO19.7475]
CalR22000W	orf19.7556	0.979	1.653	1.316	Predicted ORF in Assemblies 19, 20 and 21; possibly spurious ORF (Annotation Working Group prediction); Uncharacterized [orf19.7556;orf19.7556;IPF959.1;Contig4-3105_0014;orf6.8904;CA5966;CaO19.7556;IPF959]
CalR22010C	orf19.7557	0.837	1.42	1.1285	Protein lacking an ortholog in S. cerevisiae; transposon mutation affects filamentous growth; Verified [orf19.7557;orf19.7557;IPF27261.1;Contig4-3105_0015;orf6.8905;CaO19.7557]
CalR22570C	orf19.7586	0.741	1.528	1.1345	Chitinase, major; functional homolog of S. cerevisiae Cts1p; 4 N-glycosylation motifs; possible O-mannosylated region; putative signal peptide; hyphal-repressed; farnesol upregulated in biofilm; regulated by Efg1p, Cyr1p, Ras1p; Verified [orf19.7586;orf19.7586;IPF696.1;Contig4-3108_0002;orf6.8934;CA5987;CaO19.7586]
CalR22590C	orf19.7588	1.231	1.772	1.5015	Predicted ORF in Assemblies 19, 20 and 21; Uncharacterized [orf19.7588;orf19.7588;IPF693.1;Contig4-3108_0004;orf6.8936;CA5988;CaO19.7588;IPF693]
Cal209570W	orf19.793	0.764	1.425	1.0945	Monomeric CDK-activating kinase (CAK); functional homolog of S. cerevisiae Cak1p; phosphorylates cyclin-free human CDK2; lacks glycine loop motif; conserved lysine (K36) not required for activity; Verified [orf19.793;orf19.793;orf19.8412;IPF5082.2;IPF29659.1;Contig4-2905_0010;orf6.2993;CA1467;CaO19.793;IPF5082]
Cal209550W	orf19.794	0.867	1.502	1.1845	Predicted ORF in Assemblies 19, 20 and 21; Uncharacterized [orf19.794;orf19.794;SSN3;SRB10;orf19.8413;IPF26407.1;IPF5080.2;Contig4-2905_0013;orf6.2994;CA1468;CaO19.794;CaO19.8413]
CalR15960W	orf19.8	0.694	1.391	1.0425	Predicted ORF in Assemblies 19, 20 and 21; possibly spurious ORF (Annotation Working Group prediction); Uncharacterized [orf19.8;orf19.8;orf19.7681;IPF11570.2;IPF29984.1;orf6.506;CA0099;CaO19.8;IPF11570.5eoc]
Cal214910W	orf19.81	1.031	1.442	1.2365	Predicted ORF in Assemblies 19, 20 and 21; Uncharacterized [orf19.81;orf19.81;RRP46;Contig4-2678_0013;CaO19.81]
Cal209150W	orf19.814	0.891	1.553	1.222	Amino acid sensor, required for wild-type hyphal growth on solid serum or Lees media, but not for hyphal growth under all conditions; similar to S. cerevisiae Ssy1p aa sensor and to aa permeases; 12 predicted membrane spanning regions; Verified [orf19.814;orf19.814;CSY1;orf19.8434;IPF5802.2;IPF29641.1;IPF29694.1;Contig4-2714_0007;orf6.6705;SSY1.5;CA4215;orf19.814.3;CaO19.814]
Cal208960C	orf19.826	0.669	1.616	1.1425	Predicted ORF in Assemblies 19, 20 and 21; Uncharacterized [orf19.826;orf19.826;orf19.8446;IPF26408.1;IPF8757.2;Contig4-2913_0006;orf6.6717;CA4223;CaO19.8446;CaO19.826;IPF8757]
Cal208940C	orf19.827	0.996	1.763	1.3795	Predicted ORF in Assemblies 19, 20 and 21; possibly spurious ORF (Annotation Working Group prediction); Uncharacterized [orf19.827;orf19.827;orf19.8447;IPF26456.1;IPF8755.2;Contig4-2913_0007;orf6.6718;CA4224;CaO19.827;CaO19.8447;IPF8755]
Cal208820W	orf19.832	1.051	1.82	1.4355	Protein of major facilitator superfamily; has phosphodiesterase/nucleotide pyrophosphatase domain; similar to S. cerevisiae Gpi13p, which acts in GPI anchor biosynthesis; Uncharacterized [orf19.832;orf19.832;orf19.8452;orf19.8453;IPF26461.1;IPF16059.3;IPF3385.1;IPF3384.1;Contig4-2493_0001;Contig4-2493_0002;orf6.3843;orf6.3844;orf6.6723;CA2083;CA2084;orf19.833;IPF3384.5f]
Cal208620C	orf19.838.1	1.3	1.963	1.6315	Predicted ribosomal protein; genes encoding cytoplasmic ribosomal subunits, translation factors, and tRNA synthetases are downregulated upon phagocytosis by murine macrophage; possibly transcriptionally regulated upon hyphal formation; Uncharacterized [orf19.838.1;orf19.838.1;IPF3402.2;IPF29662.1;Contig4-2739_0010;orf6.1126;CA0322]
Cal208600C	orf19.840	1.294	2.136	1.715	Putative ribosomal protein; genes encoding cytoplasmic ribosomal subunits, translation factors, and tRNA synthetases are downregulated upon phagocytosis by murine macrophage; Uncharacterized [orf19.840;orf19.840;orf19.8460;IPF19037.2;IPF3404.2;Contig4-2739_0007;orf6.1127;orf6.3851;CA2092;RPL21A.3]
Cal208430W	orf19.848	0.933	1.468	1.2005	Putative GPI-anchored protein of unknown function; possibly spurious ORF (Annotation Working Group prediction); Uncharacterized [orf19.848;orf19.848;orf19.8468;IPF14806.1;IPF3416.1;Contig4-2477_0002;orf6.3746;orf6.901;CA2015;CaO19.848;IPF3416]
Cal208410W	orf19.848	0.373	1.654	1.0135	Putative GPI-anchored protein of unknown function; possibly spurious ORF (Annotation Working Group prediction); Uncharacterized [orf19.848;orf19.848;orf19.8468;IPF14806.1;IPF3416.1;Contig4-2477_0002;orf6.3746;orf6.901;CA2015;CaO19.848;IPF3416]
Cal208280W	orf19.852	0.689	1.848	1.2685	Predicted ORF in Assemblies 19, 20 and 21; regulated by Gcn2p and Gcn4p; expressed in opaque MTLa/MTLa cells; Uncharacterized [orf19.852;orf19.852;orf19.8472;IPF26435.1;IPF14031.2;Contig4-2545_0002;orf6.1542;CA0549;CaO19.852;IPF14031;IPF14031.1]
Cal601820C	orf19.88	0.737	1.29	1.0135	Protein described as ketol-acid reductoisomerase; antigenic during human or murine infection; regulated by Gcn4p; amino acid starvation (3-aminotriazole) induced; biofilm induced; macrophage-downregulated protein; no human or murine homolog; Verified [orf19.88;orf19.88;orf19.7733;IPF9595.2;IPF19137.2;Contig4-2691_0001;orf6.3699;orf6.810;CA1983;CaO19.88]
Cal207520W	orf19.895:orf19.894	0.661	1.566	1.1135	MAP kinase of osmotic-, heavy metal-, and core stress response; role in regulation of glycerol, D-arabitol in response to stress; phosphorylated in response to H2O2 (Ssk1-dependent) or NaCl; mutant induces protective mouse immune response:: Ortholog(s) have guanyl-nucleotide exchange factor activity, role in retrograde transport, endosome to Golgi and Golgi membrane, Ric1p-Rgp1p complex, guanyl-n…
Cal501490W	orf19.921	1.236	2.081	1.6585	Predicted ORF in Assemblies 19, 20 and 21; Uncharacterized [orf19.921;orf19.921;orf19.8536;IPF16514.3;Contig4-2692_0006;orf6.1243;orf6.2867;CA1388;CaO19.921;IPF16514;IPF16514.2]
Cal501350W	orf19.929	0.874	1.653	1.2635	Predicted ORF in Assemblies 19, 20 and 21; Uncharacterized [orf19.929;orf19.929;orf19.8544;IPF26332.1;IPF8420.2;Contig4-2136_0001;orf6.2859;CA1381;CaO19.929;CaO19.8544;IPF8420]
Cal501140C	orf19.936	1.487	1.902	1.6945	Predicted ORF in Assemblies 19, 20 and 21; Uncharacterized [orf19.936;orf19.936;ASM2;orf19.8551;IPF26316.1;IPF9398.1;Contig4-2726_0007;Contig4-2726_0009;orf6.8185;CA5393;CaO19.8551;CaO19.936;IPF9398]
Cal602000W	orf19.94	1.111	1.926	1.5185	Predicted ORF in Assemblies 19, 20 and 21; Uncharacterized [orf19.94;orf19.94;orf19.7740;IPF17606.2;IPF19749.1;orf6.3706;CA1988;CaO19.94;CaO19.7740;IPF19749]
Cal501010W	orf19.942	0.846	1.415	1.1305	Protein described as subunit of glucan synthase; macrophage-induced gene; Uncharacterized [orf19.942;orf19.942;orf19.8557;IPF26313.1;IPF26324.1;IPF1539.1;IPF1538.2;Contig4-3103_0054;orf6.8191;KRE62.5f;KRE62.3f;orf19.942.1;CA5399;CA5400]
Cal500940C	orf19.944	0.518	1.601	1.0595	Putative D-amino acid oxidase; Uncharacterized [orf19.944;orf19.944;orf19.8559;IPF26335.1;IPF1541.1;Contig4-3103_0050;orf6.8193;CA5402;IFG3.3]
Cal602050C	orf19.96	1.101	1.585	1.343	DNA topoisomerase I; required for wild-type growth and for wild-type mouse virulence; sensitive to camptothecin; induced upon adherence to polystyrene; Verified [orf19.96;orf19.96;orf19.7742;IPF17557.3;IPF29943.1;Contig4-2327_0003;Contig4-2327_0004;orf6.2499;orf6.3708;CA1990;CaO19.96;IPF17557.2]
Cal124230C	orf19.994	2.43	4.23	3.33	Predicted ORF in Assemblies 19, 20 and 21; possibly spurious ORF (Annotation Working Group prediction); transcriptionally activated by Mnl1p under weak acid stress; Uncharacterized [orf19.994;orf19.994;orf19.8609;IPF26297.1;IPF20134.1;Contig4-2932_0016;orf6.5804;CA3522;CaO19.8609;CaO19.994;IPF20134]
Cal120330W	snR128	1.955	2.367	2.161	Small nucleolar RNA (snoRNA)
Cal120340W	snR128	1.201	1.64	1.4205	Small nucleolar RNA (snoRNA)
CalR23260W	snR13	0.803	1.355	1.079	Small nucleolar RNA (snoRNA)
Cal410140W	snR18	0.618	1.688	1.153	Small nucleolar RNA (snoRNA)
Cal502550C	snR189c	0.891	1.585	1.238	Small nucleolar RNA (snoRNA)
Cal120320W	snR190	1.488	2.303	1.8955	Small nucleolar RNA (snoRNA)
Cal120310W	snR190	1.17	1.704	1.437	Small nucleolar RNA (snoRNA)
Cal702650W	snR24	0.658	1.567	1.1125	Small nucleolar RNA (snoRNA)
CalR01140W	snR35a	1.17	1.707	1.4385	Small nucleolar RNA (snoRNA)
Cal112840W	snR39b	2.045	2.151	2.098	Small nucleolar RNA (snoRNA)
Cal112850W	snR39b	1.68	2.348	2.014	Small nucleolar RNA (snoRNA)
Cal112830W	snR39b	0.958	1.488	1.223	Small nucleolar RNA (snoRNA)
Cal313460W	snR44d	0.934	1.712	1.323	Small nucleolar RNA (snoRNA)
Cal224160W	snR47	0.719	1.364	1.0415	Small nucleolar RNA (snoRNA)
Cal204510W	snR48	1.295	1.926	1.6105	Small nucleolar RNA (snoRNA)
Cal204500W	snR48	0.72	1.326	1.023	Small nucleolar RNA (snoRNA)
Cal214260C	snR54	1.129	1.759	1.444	Small nucleolar RNA (snoRNA)
Cal214270W	snR54	0.639	1.387	1.013	Small nucleolar RNA (snoRNA)
CalR13870W	snR55,snR57	1.776	2.232	2.004	Small nucleolar RNA (snoRNA)
CalR13860C	snR55,snR57	0.999	1.617	1.308	Small nucleolar RNA (snoRNA)
CalR13880C	snR57b	1.41	2.106	1.758	Small nucleolar RNA (snoRNA)
Cal605320W	snR58	1.045	1.599	1.322	Small nucleolar RNA (snoRNA)
CalR13850W	snR61	2.594	3.273	2.9335	Small nucleolar RNA (snoRNA)
CalR13840C	snR61	2.136	2.762	2.449	Small nucleolar RNA (snoRNA)
Cal124470W	snR62	0.827	1.695	1.261	Small nucleolar RNA (snoRNA)
Cal212190C	snR63	0.992	1.906	1.449	Small nucleolar RNA (snoRNA)
Cal212200W	snR63	0.963	1.747	1.355	Small nucleolar RNA (snoRNA)
Cal125720C	snR64	1.659	1.989	1.824	Small nucleolar RNA (snoRNA)
CalR14820W	snR66	1.725	2.463	2.094	Small nucleolar RNA (snoRNA)
CalR14800W	snR66	1.104	1.795	1.4495	Small nucleolar RNA (snoRNA)
CalR14810W	snR66	1.044	1.666	1.355	Small nucleolar RNA (snoRNA)
Cal221430W	snR68	1.192	1.569	1.3805	Small nucleolar RNA (snoRNA)
Cal129780W	snR70	1.193	1.947	1.57	Small nucleolar RNA (snoRNA)
Cal129790W	snR70	1.092	1.826	1.459	Small nucleolar RNA (snoRNA)
CalR05190W	snR71	0.986	1.638	1.312	Small nucleolar RNA (snoRNA)
Cal403500W	snR72	0.621	1.419	1.02	Small nucleolar RNA (snoRNA)
Cal403510C	snR73	1.254	1.797	1.5255	Small nucleolar RNA (snoRNA)
Cal403520W	snR73	1.096	1.6	1.348	Small nucleolar RNA (snoRNA)
Cal403540W	snR74	0.832	1.404	1.118	Small nucleolar RNA (snoRNA)
Cal403550C	snR75	1.542	2.291	1.9165	Small nucleolar RNA (snoRNA)
Cal403560C	snR76	1.42	1.877	1.6485	Small nucleolar RNA (snoRNA)
Cal403580W	snR76,snR77	1.416	2.083	1.7495	Small nucleolar RNA (snoRNA)
Cal403570C	snR77,snR76	1.218	1.834	1.526	Small nucleolar RNA (snoRNA)
Cal403600W	snR77b	2.141	2.866	2.5035	Small nucleolar RNA (snoRNA)
Cal403590C	snR77b	1.847	2.508	2.1775	Small nucleolar RNA (snoRNA)
Cal403610C	snR78	1.623	2.493	2.058	Small nucleolar RNA (snoRNA)
Cal405970W	snR79	2.098	2.866	2.482	Small nucleolar RNA (snoRNA)
Cal405960C	snR79	1.025	1.893	1.459	Small nucleolar RNA (snoRNA)
Cal129870C	snR87	0.77	1.359	1.0645	Small nucleolar RNA (snoRNA)
CalR12570W	tC(GCA)1	0.772	1.588	1.18	tRNA
CalR12560C	tC(GCA)1	0.665	1.49	1.0775	tRNA
Cal208230W	tE(CUC)1	0.722	1.388	1.055	tRNA
Cal211130W	tG(GCC)3,tG(GCC)5,tG(GCC)4,tG(GCC)2,tG(GCC)1,tG(GCC)6	1.8	1.269	1.5345	tRNA
Cal401970W	tG(GCC)5	0.527	1.577	1.052	tRNA
CalR11440W	tH(GUG)1	0.77	1.484	1.127	tRNA
Cal212220W	tI(AAU)3:orf19.3573	0.682	1.347	1.0145	tRNA
Cal220740W	tP(UGG)2	1.154	1.475	1.3145	tRNA
Cal306400W	tR(UCU)1	1.061	1.695	1.378	tRNA
Cal304300W	tV(AAC)2,orf19.1662	0.887	1.371	1.129	tRNA

## Sheet: ORFs loci
	Probe ID
	Cal100130W
	Cal403570C
	Cal403780C
	Cal605320W
	Cal100390W
	Cal100400C
	Cal101470W
	Cal101670C
	Cal101770W
	Cal102760C
	Cal102890C
	Cal103190C
	Cal103550W
	Cal105070C
	Cal105090W
	Cal105150C
	Cal105300C
	Cal105450C
	Cal105480W
	Cal105570W
	Cal106750C
	Cal106770W
	Cal106920W
	Cal106980W
	Cal108090C
	Cal108950W
	Cal109150C
	Cal109340C
	Cal109430C
	Cal109580W
	Cal109610C
	Cal112850W
	Cal112860W
	Cal113750C
	Cal114410W
	Cal114570C
	Cal114880W
	Cal115590C
	Cal116010C
	Cal117310C
	Cal117710C
	Cal119060W
	Cal120190C
	Cal120210W
	Cal120320W
	Cal120340W
	Cal120450W
	Cal120520C
	Cal123740W
	Cal123900C
	Cal124470W
	Cal125060W
	Cal125410W
	Cal125440W
	Cal125470C
	Cal125720C
	Cal126150W
	Cal126510C
	Cal128420C
	Cal128620W
	Cal128770W
	Cal128960C
	Cal128990W
	Cal129210W
	Cal129790W
	Cal129870C
	Cal129890W
	Cal129900C
	Cal130250C
	Cal130610C
	Cal131330W
	Cal131480C
	Cal132000W
	Cal132310C
	Cal200450C
	Cal202450W
	Cal202570W
	Cal202780W
	Cal203430C
	Cal203720W
	Cal204140C
	Cal204510W
	Cal204710W
	Cal204740W
	Cal204750C
	Cal205510W
	Cal206930W
	Cal208430W
	Cal208600C
	Cal208620C
	Cal208960C
	Cal209550W
	Cal209570W
	Cal210370C
	Cal210480C
	Cal210700W
	Cal211130W
	Cal211930C
	Cal212080C
	Cal212160W
	Cal212180W
	Cal212190C
	Cal212580C
	Cal212810C
	Cal214230C
	Cal214260C
	Cal214770W
	Cal214830W
	Cal214910W
	Cal215290C
	Cal215380W
	Cal217950C
	Cal218360W
	Cal218980C
	Cal219000W
	Cal219100C
	Cal219510W
	Cal219520C
	Cal219580W
	Cal219630W
	Cal219670W
	Cal221200W
	Cal222340W
	Cal222710C
	Cal222840W
	Cal223300C
	Cal223780W
	Cal224160W
	Cal300200W
	Cal302460C
	Cal302540C
	Cal302690W
	Cal303010W
	Cal303140C
	Cal303420W
	Cal303430C
	Cal303980C
	Cal304380W
	Cal304900W
	Cal305520W
	Cal305620C
	Cal305770C
	Cal305940W
	Cal310210C
	Cal310490W
	Cal310640C
	Cal310670C
	Cal311340W
	Cal311640C
	Cal311990C
	Cal312310C
	Cal312670W
	Cal313310C
	Cal313460W
	Cal313650W
	Cal314010W
	Cal315240C
	Cal316050C
	Cal316720C
	Cal316830C
	Cal316870W
	Cal401660C
	Cal401680C
	Cal402060W
	Cal402130W
	Cal402830W
	Cal402860W
	Cal402960W
	Cal403230C
	Cal403250W
	Cal403330W
	Cal403380C
	Cal403460C
	Cal403510C
	Cal403550C
	Cal403560C
	Cal403590C
	Cal403610C
	Cal405490W
	Cal405730W
	Cal405960C
	Cal407410W
	Cal408400W
	Cal408810W
	Cal409270C
	Cal409890W
	Cal411040C
	Cal411090C
	Cal412030C
	Cal412120W
	Cal413360W
	Cal414380C
	Cal415030W
	Cal415970W
	Cal500940C
	Cal502550C
	Cal503130W
	Cal503170C
	Cal503410C
	Cal503470C
	Cal503630C
	Cal503820W
	Cal505180C
	Cal505420C
	Cal505660C
	Cal505710W
	Cal506340W
	Cal506740W
	Cal507780C
	Cal508620C
	Cal508660C
	Cal508800W
	Cal509190C
	Cal510250C
	Cal510870C
	Cal510910W
	Cal511050W
	Cal511130W
	Cal511340W
	Cal511770C
	Cal512080C
	Cal600730C
	Cal601320C
	Cal601820C
	Cal602050C
	Cal602310C
	Cal602460C
	Cal602560W
	Cal602600C
	Cal602930W
	Cal602960W
	Cal603370C
	Cal603470W
	Cal603570W
	Cal603630W
	Cal603790W
	Cal604330C
	Cal604570C
	Cal605340W
	Cal607650W
	Cal608430C
	Cal609040C
	Cal701370W
	Cal701390W
	Cal701680W
	Cal702080W
	Cal702100W
	Cal702110C
	Cal702660W
	Cal702670W
	Cal702730W
	Cal703110C
	Cal703600C
	Cal703750C
	Cal703840C
	Cal704800C
	Cal707150W
	Cal707870W
	Cal708320W
	Cal708360W
	Cal708370C
	Cal708440W
	Cal708500C
	CalR01980C
	CalR02440C
	CalR02690W
	CalR02800C
	CalR02890W
	CalR03130C
	CalR05190W
	CalR05200C
	CalR05820W
	CalR05880C
	CalR06050W
	CalR06190C
	CalR06840C
	CalR07810W
	CalR08520C
	CalR09270C
	CalR09450W
	CalR10780W
	CalR11070W
	CalR12280W
	CalR12560C
	CalR13840C
	CalR13860C
	CalR13880C
	CalR13940C
	CalR14470C
	CalR14510C
	CalR14820W
	CalR15530W
	CalR17200C
	CalR18250W
	CalR18780W
	CalR18790C
	CalR19060C
	CalR19090W
	CalR20280W
	CalR21230C
	CalR21410W
	CalR22010C
	CalR22590C
	CalR23260W

## Sheet: Promoter loci
	Probe ID
	Cal101740W
	Cal101940C
	Cal103700W
	Cal104390C
	Cal105140W
	Cal105350W
	Cal105470C
	Cal105990W
	Cal106780W
	Cal106990W
	Cal108100W
	Cal108640W
	Cal109080W
	Cal109680W
	Cal111700W
	Cal111730W
	Cal112440C
	Cal112830W
	Cal112840W
	Cal113720W
	Cal115400W
	Cal115580W
	Cal115880W
	Cal115940W
	Cal116020W
	Cal116680C
	Cal116740W
	Cal117110W
	Cal117920W
	Cal119930C
	Cal120310W
	Cal120330W
	Cal120570W
	Cal122150C
	Cal122930C
	Cal123020W
	Cal124230C
	Cal124410W
	Cal125070C
	Cal125450C
	Cal126820C
	Cal127100W
	Cal127420W
	Cal128040W
	Cal129350W
	Cal129780W
	Cal129800W
	Cal129860W
	Cal130330W
	Cal131870W
	Cal202320W
	Cal202540W
	Cal203440W
	Cal203890W
	Cal204500W
	Cal204700C
	Cal204950W
	Cal205240C
	Cal205530C
	Cal205990W
	Cal207520W
	Cal208230W
	Cal208280W
	Cal208410W
	Cal208820W
	Cal208940C
	Cal209150W
	Cal210500W
	Cal210650W
	Cal211940W
	Cal212200W
	Cal212220W
	Cal212590W
	Cal213590W
	Cal214240W
	Cal214270W
	Cal215050W
	Cal215370W
	Cal216440W
	Cal217400C
	Cal217940W
	Cal218450W
	Cal218650W
	Cal219360W
	Cal219610W
	Cal220490W
	Cal220740W
	Cal221430W
	Cal221690W
	Cal222320W
	Cal222770W
	Cal222830C
	Cal222920W
	Cal223090W
	Cal223440W
	Cal223850C
	Cal300210C
	Cal301200W
	Cal301740C
	Cal303020W
	Cal303060W
	Cal303670C
	Cal303720W
	Cal304300W
	Cal304420W
	Cal304450W
	Cal304910W
	Cal305250W
	Cal305550W
	Cal305650W
	Cal305750W
	Cal305760W
	Cal305780W
	Cal306400W
	Cal309470W
	Cal309700W
	Cal310630W
	Cal311630W
	Cal311790C
	Cal312030W
	Cal312200C
	Cal312340C
	Cal312550W
	Cal313230W
	Cal313280W
	Cal313590W
	Cal316260C
	Cal316710W
	Cal401970W
	Cal402150W
	Cal402240W
	Cal403030W
	Cal403060W
	Cal403120W
	Cal403200W
	Cal403260C
	Cal403390W
	Cal403420W
	Cal403470W
	Cal403480W
	Cal403500W
	Cal403520W
	Cal403540W
	Cal403580W
	Cal403600W
	Cal404120W
	Cal404500W
	Cal405270W
	Cal405720C
	Cal405950W
	Cal405970W
	Cal406840W
	Cal407600W
	Cal407640W
	Cal407790W
	Cal408450W
	Cal408660W
	Cal408740W
	Cal409150W
	Cal409240W
	Cal410140W
	Cal410800C
	Cal411050W
	Cal411510W
	Cal411770W
	Cal414330W
	Cal415980C
	Cal501010W
	Cal501140C
	Cal501350W
	Cal501490W
	Cal501590W
	Cal502360W
	Cal502540W
	Cal503320W
	Cal503420W
	Cal503460W
	Cal503490W
	Cal504000W
	Cal504890C
	Cal505440W
	Cal505740W
	Cal506380W
	Cal507770W
	Cal508630W
	Cal508890W
	Cal508930W
	Cal508950W
	Cal508960W
	Cal509610W
	Cal510240W
	Cal510650W
	Cal510750W
	Cal601640W
	Cal601680C
	Cal602000W
	Cal602520W
	Cal602920C
	Cal603620C
	Cal605230W
	Cal605350W
	Cal606920C
	Cal607720W
	Cal608060W
	Cal609050W
	Cal609250W
	Cal609370W
	Cal701460W
	Cal701470C
	Cal701620W
	Cal701640W
	Cal701760W
	Cal702210C
	Cal702650W
	Cal702930C
	Cal702990W
	Cal703230C
	Cal703300C
	Cal703330C
	Cal703630W
	Cal705070W
	Cal705520W
	Cal705530C
	Cal705790C
	Cal707140C
	Cal707480W
	Cal707640C
	Cal707820W
	Cal708430C
	Cal709180C
	CalR01140W
	CalR01430W
	CalR02330W
	CalR02840W
	CalR02920W
	CalR02990W
	CalR03040W
	CalR03970W
	CalR04020W
	CalR04160C
	CalR04410W
	CalR04960W
	CalR05010W
	CalR05670C
	CalR05910W
	CalR06210W
	CalR07040C
	CalR09190W
	CalR09920W
	CalR11160C
	CalR11440W
	CalR11990W
	CalR12110W
	CalR12570W
	CalR13850W
	CalR13870W
	CalR14460W
	CalR14670C
	CalR14700W
	CalR14800W
	CalR14810W
	CalR14870W
	CalR15770W
	CalR15960W
	CalR17890C
	CalR18360W
	CalR19070W
	CalR20490W
	CalR21170C
	CalR21550W
	CalR22000W
	CalR22570C

## Sheet: non-Coding RNA loci
snoRNA	tRNA
CD39	tC(GCA)1
LSU-C2809	tC(GCA)1
snR128	tE(CUC)1
snR128	tG(GCC)3
snR13	tG(GCC)5
snR18	tH(GUG)1
snR189c	tI(AAU)3
snR190	tP(UGG)2
snR190	tR(UCU)1
snR24	tV(AAC)2
snR35a	tG(GCC)5
snR39b	tG(GCC)4
snR39b	tG(GCC)2
snR39b	tG(GCC)1
snR44d	tG(GCC)6
snR47
snR48
snR48
snR54
snR54
snR55
snR55
snR57b
snR58
snR61
snR61
snR62
snR63
snR63
snR64
snR66
snR66
snR66
snR68
snR70
snR70
snR71
snR72
snR73
snR73
snR74
snR75
snR76
snR76
snR77
snR77b
snR77b
snR78
snR79
snR79
snR87
snR57
snR77
snR76
