# Supplementary material for: The p38/HOG stress-activated protein kinase network couples growth to division in Candida albicans
Source: PLoS Genet. 2019 Mar 28;15(3):e1008052. doi: 10.1371/journal.pgen.1008052 (PMC6456229; doi:10.1371/journal.pgen.1008052)
Supplement: S6 Table — Data were extracted from CGD database. (XLSX) [file pgen.1008052.s012.xlsx]

## Sheet: Description
	Table S6
	Description
	List of size mutants with virulence defects. Data were extracted from CGD database and recent study of Binkley et al (*)
	* : Binkley J, Arnaud MB, Inglis DO, Skrzypek MS, Shah P, Wymore F, et al. The Candida Genome Database: the new homology information page highlights protein similarity and phylogeny. Nucleic Acids Res. 2014;42(Database issue):D711-6. doi: 10.1093/nar/gkt1046. PubMed PMID: 24185697; PubMed Central PMCID: PMCPMC3965001.

## Sheet: Small size mutants
Small size mutant with virulence defect
	Gene name	Orf19 ID	Mutant median size	Description
	SWE1	orf19.4867	44	Putative protein kinase with a role in control of growth and morphogenesis, required for full virulence; mutant cells are small, rounded, and sometimes binucleate; not required for filamentous growth; mutant is hypersensitive to caspofungin
	CYR1	orf19.5148	51	Class III adenylyl cyclase; mutant lacks cAMP; mutant hyphal growth defect rescued by exogenous cAMP; required for mouse mucosal or systemic infection; role in macrophage sensitivity, apoptosis; downstream of Ras1p and CO2 signaling
	HAP43	orf19.681	38	CCAAT-binding factor-dependent transcription factor; repressor; also called CAP2; required for low iron response; similar to bZIP transcription factor AP-1; repressed by Sfu1; ciclopirox olamine induced; rat catheter, Spider biofilm induced
	AHR1	orf19.7381	34	Zn(II)2Cys6 transcription factor; involved in regulation of adhesion genes; involved in white-opaque switch; forms complex with Mcm1; mutant is sensetive to 5-fluorocytosine and lithium chloride; Spider biofilm induced
	PBS2	orf19.7388	49.2	MAPK kinase (MAPKK); role in osmotic and oxidative stress responses, oxidative stress adaptation; required for stress regulation of Hog1p localization and activity; functional homolog of S. cerevisiae Pbs2p
	SCH9	orf19.829	34	Protein kinase; involved in growth control, cell size, resistance to rapamycin, cations, chlamydospore formation, filamentous growth under some conditions, and virulence; prevents hyphal growth in hypoxia at high CO2; Spider biofilm induced
	HOG1	orf19.895	50.2	MAP kinase of osmotic-, heavy metal-, and core stress response; role in regulation of glycerol, D-arabitol in response to stress; phosphorylated in response to H2O2 (Ssk1-dependent) or NaCl; mutant induces protective mouse immune response

## Sheet: Large size mutants
Large size mutant with virulence defect
	Gene name	Orf19 ID	Mutant median size	Description
	GAT1	orf19.1275	85.4	GATA-type transcription factor; regulator of nitrogen utilization; required for nitrogen catabolite repression and utilization of isoleucine, tyrosine and tryptophan N sources; required for virulence in a mouse systemic infection model
	CTF1	orf19.1499	86.7	Putative zinc-finger transcription factor, similar to A. nidulans FarA and FarB; activates genes required for fatty acid degradation; induced by oleate; null mutant displays carbon source utilization defects and slightly reduced virulence
	NDT80	orf19.2119	94.9	Ortholog of Ndt80; meiosis-specific transcription factor; activator of CDR1 induction by antifungal drugs; required for wild-type drug resistance and for Spider biofilm formation; transcript induced by antifungal drug treatment
	GZF3	orf19.2842	84	GATA-type transcription factor; oxidative stress-induced via Cap1; mutant has abnormal colony morphology and altered sensitivity to fluconazole, LiCl, and copper; Spider biofilm induced
	MTLA1	orf19.3201	101.7	Homeodomain protein of the MTLa mating type locus; a1 and alpha2 together repress white-opaque switching and mating (an opaque-specific process); a/alpha mating type may increase virulence by competitive advantage; Spider biofilm induced
	SLN1	orf19.3256	88	Histidine kinase involved in a two-component signaling pathway that regulates cell wall biosynthesis; mutants are sensitive to growth on H2O2 medium; rat catheter and Spider biofilm induced
	SWI4	orf19.4545	91	Putative component of the SBF transcription complex involved in G1/S cell-cycle progression; periodic mRNA expression, peak at cell-cycle G1/S phase; predicted, conserved MBF binding sites upstream of G1/S-regulated genes
	ZCF27	orf19.4649	88.8	Putative Zn(II)2Cys6 transcription factor
	ROB1	orf19.4998	86.7	Zn(II)2Cys6 transcription factor; required for Spider model biofilm formation; mutant displays abnormal colony morphology and invasive growth; caspofungin repressed; flow model biofilm induced; rat catheter biofilm repressed
	CCR4	orf19.5101	87	Component of the Ccr4-Pop2 mRNA deadenylase; transposon mutation affects filamentous growth
	ASH1	orf19.5343	84	GATA-like transcription factor; localizes to daughter cell, hyphal tip cell nuclei; mRNA localization mediated by She3; required for WT virulence and filamentous growth on solid media; Ras1 repressed in yeast, Cyr1 repressed yeast, hyphae
	POP2	orf19.5734	81	Component of the Ccr4-Pop2 mRNA deadenylase; heterozygous null mutant exhibits resistance to parnafungin and cordycepin in the C. albicans fitness test
	ACE2	orf19.6124	88	Transcription factor; similar to S. cerevisiae Ace2 and Swi5; regulates morphogenesis, cell separation, adherence, virulence in a mice; mutant is hyperfilamentous; rat catheter and Spider biofilm induced
	GCN5	orf19.705	70	Ortholog(s) have histone acetyltransferase activity (H3-K14 specific), histone acetyltransferase activity (H3-K9 specific), lysine-acetylated histone binding activity
